# Supplementary material for: Strategy of micro-environmental adaptation to cold seep among different brittle stars’ colonization
Source: Frontiers journal article supplement (doi:10.3389/fevo.2022.1027139), 2022-11-23
Supplement: Table_1.XLSX [file Table_1.XLSX]

## Sheet: traits
ID	Species	synonym	ChineseName	Family	Order	Sample	sample_depth	minDepth	maxDepth	depth_stat (I: Intertidal, S: Shallow 0-200, UB: upper bathyal 200-700, MB: middle bathyal 700-2000, LB: lower bathyal 2000-4000, Ab: Abyss 4000-6000, H: hardal, >6000	ecosystem	class1	class2	class3	class4	SST	SSS
Acanthaster_brevispinus	Acanthaster brevispinus					NC_007789.1						OG	OG	OG	OG
Amphioplus_laevis	Amphioplus (Lymanella) laevis	Amphioplus laevis		Amphiuridae	Amphilepidida	MN276320.1		3	300	S		Shallow	Shallow	Shallow	Shallow
Amphipholis_squamata	Amphipholis squamata			Amphiuridae	Amphilepidida	FN562578.1		5	137	S		Shallow	Shallow	Shallow	Shallow
Amphiura_digitula2	Amphiura (Amphiura) digitula	Amphiura digitula	小指阳遂足	Amphiuridae	Amphilepidida	MK343096.1, NC_042738.1		120	130	S		Shallow	Shallow	Shallow	Shallow	15~30	30~35
Amphiura_sp	Amphiura (Amphiura) sp.			Amphiuridae	Amphilepidida	SCP88	1300	1300	1300	MB	Seep	Deep	DeepAnt	Seep	Seep
Amphiura_sinicola	Amphiura (Fellaria) sinicola	Amphiura sinicola		Amphiuridae	Amphilepidida	NC_045938.1		0	200	S		Shallow	Shallow	Shallow	Shallow	15~25	25~35
Amphiura_sp_JN-2020	Amphiura sp JN-2020			Amphiuridae	Amphilepidida	MN296491.1	1950	1950	1950	MB		Deep	DeepAnt	Deep	DeepAnt
Ophioplocus_incipiens	Ophioplocus incipiens	Ophioceres incipiens		Hemieuryalidae	Amphilepidida	NC_040148.1	277	25	2609	S-LB	Antartic	Deep	DeepAnt	Deep	DeepAnt	-5~5	30-35
Ophioplocus_japonicus	Ophioplocus japonicus			Hemieuryalidae	Amphilepidida	NC_044109.1		638	641	UB		Shallow	Shallow	Shallow	Shallow	15~30
Ophiopholis_aculeata	Ophiopholis aculeata			Ophiopholidae	Amphilepidida	NC_005334.1		0	10730	S-Ab	Antartic	Deep	DeepAnt	Deep	DeepAnt	-5~15	25~35
Ophiopholis_japonica2	Ophiopholis japonica			Ophiopholidae	Amphilepidida	NC_045939.1		15	1865	S-MB		Deep	DeepAnt	Deep	DeepAnt	0~25	30~35
Ophiopholis_mirabilis	Ophiopholis mirabilis			Ophiopholidae	Amphilepidida	NC_045940.1		24	144	S		Shallow	Shallow	Shallow	Shallow	10~20	25~35
Histampica_haimaensis	Histampica haimaensis sp.nov			Ophiothamnidae	Amphilepidida	MZ442339.1,SCP45	1300	1300	1300	MB	Seep	Deep	DeepAnt	Seep	Seep
Astrohamma_tuberculatum	Astrohamma tuberculatum			Gorgonocephalidae	Euryalida	MH671876.1	612	55	975	S-UB	Antartic	Shallow	DeepAnt	Shallow	DeepAnt	-5~0	30-35
Astrospartus_mediterraneus	Astrospartus mediterraneus			Gorgonocephalidae	Euryalida	NC_013878.1		50	777	S-UB		Shallow	Shallow	Shallow	Shallow	15-30	20-35
Astrotoma_agassizii2	Astrotoma agassizii			Gorgonocephalidae	Euryalida	MH671878.1, NC_040146.1	457	20	2283	S-MB	Antartic	Deep	DeepAnt	Deep	DeepAnt	-5-15	30-35
Gorgonocephalus_chilensis	Gorgonocephalus chilensis			Gorgonocephalidae	Euryalida	NC_040147.1	664	62	3405	S-LB	Antartic	Deep	DeepAnt	Deep	DeepAnt	-5~20	30~35
Ophiacantha_linea	Ophiacantha linea			Ophiacanthidae	Ophiacanthida	NC_023254.1				UB-LB		Deep	DeepAnt	Deep	DeepAnt	10~30
Ophiophthalmus_sp	Ophiophthalmus sp.			Ophiacanthidae	Ophiacanthida	SCP60,SCP61	1300			MB	Seep	Deep	DeepAnt	Seep	Seep
Ophiomastix_mixta	Ophiomastix mixta			Ophiocomidae	Ophiacanthida	NC_045937.1		0	217	S		Shallow	Shallow	Shallow	Shallow	25~30	30~35
Ophiarachnella_gorgonia	Ophiarachnella gorgonia			Ophiodermatidae	Ophiacanthida	NC_046053.1, ZSD1_4				S-UB		Shallow	Shallow	Shallow	Shallow	20~30	30~35
Ophiocomina_nigra	Ophiocomina nigra			Ophiotomidae	Ophiacanthida	FN562577.1		7	112	S		Shallow	Shallow	Shallow	Shallow	5~15	30~35
Ophioplinthus_brevirima	Ophioplinthus brevirima			Ophiopyrgidae	Ophiurida	NC_040150.1	228	50	1620	S-MB	Antartic	Deep	DeepAnt	Deep	DeepAnt	-5~0	30~35
Ophioplinthus_gelida	Ophioplinthus gelida			Ophiopyrgidae	Ophiurida	NC_040145.1	228	14	2844	S-LB	Antartic	Deep	DeepAnt	Deep	DeepAnt	-5~0	30~35
Ophiosteira_antarctica	Ophiosteira antarctica			Ophiopyrgidae	Ophiurida	NC_040151.1	570	191	765	UB	Antartic	Shallow	DeepAnt	Shallow	DeepAnt	-5~0	30~35
Ophiosteira_sp	Ophiosteira sp.			Ophiopyrgidae	Ophiurida	MH671884.1	570	570	570	UB	Antartic	Shallow	DeepAnt	Shallow	DeepAnt
Ophiuroglypha_kinbergi	Ophiuroglypha kinbergi	Ophiura kinbergi		Ophiopyrgidae	Ophiurida	NC_052742.1		1	1180	S-UB		Shallow	Shallow	Shallow	Shallow	10~30	25~35
Ophionotus_victoriae	Ophionotus victoriae			Ophiuridae	Ophiurida	NC_040149.1	122	3	1266	S-MB	Antartic	Deep	DeepAnt	Deep	DeepAnt	-5~0	30~35
Ophiura_albida	Ophiura albida			Ophiuridae	Ophiurida	NC_010691.1		0	621	S		Shallow	Shallow	Shallow	Shallow	5~15	30~35
Ophiura_lutkeni	Ophiura lutkeni			Ophiuridae	Ophiurida	NC_005930.1				S-UB		Shallow	Shallow	Shallow	Shallow
Ophiura_sarsii	Ophiura sarsii			Ophiuridae	Ophiurida	NC_044861.1		28	410	S-UB		Shallow	Shallow	Shallow	Shallow	-5~20	25~35

## Sheet: MT_size
ID	SequenceID	Family	Clade	D1	D2	D3	D4	D5	MT_size	cds_size	cds_count	rRNA_size	rRNA_count	tRNA_size	tRNA_count	ATP6	ATP8	COX1	COX2	COX3	CYTB	ND1	ND2	ND3	ND4	ND4L	ND5	ND6	rrnL	rrnS	trnA	trnC	trnD	trnE	trnF	trnG	trnH	trnI	trnK	trnL1	trnL2	trnL3	trnM	trnM2	trnN	trnP	trnQ	trnR	trnS1
Acanthaster_brevispinus	NC_007789.1	.	.	OG	OG	OG	OG	OG	16254	11493	13	2475	2	1563	22	693	165	1554	690	783	1140	981	1065	351	1383	297	1902	489	1545	930	69	69	72	69	72	69	69	72	72	72	72	0	72	0	72	72	72	69	69
Amphiura_sp	SCP88	Amphiuridae	C1	Deep	DeepAnt	Seep	Seep	Seep	16147	11400	13	2289	2	1556	22	690	141	1602	693	798	1161	999	1059	360	1359	294	1764	480	1390	899	69	66	69	69	72	69	72	71	72	72	75	0	72	0	75	69	72	72	66
Amphiura_sp_JN-2020	MN296491.1	Amphiuridae	C1	Deep	DeepAnt	Deep	DeepAnt	Antartic	15457	11301	13	2277	2	1533	22	684	114	1602	690	798	1107	1002	1011	360	1359	297	1797	480	1389	888	66	69	69	66	72	63	72	72	66	72	72	0	72	0	72	66	72	72	69
Amphioplus_laevis	MN276320.1	Amphiuridae	C1	Shallow	Shallow	Shallow	Shallow	Shallow	16084	11376	13	2277	2	1566	22	693	135	1599	690	798	1146	999	1041	360	1347	297	1791	480	1386	891	72	66	69	69	72	69	69	75	72	75	75	0	75	0	75	69	72	66	69
Amphipholis_squamata	FN562578.1	Amphiuridae	C1	Shallow	Shallow	Shallow	Shallow	Shallow	16907	11391	13	2292	2	1560	22	684	126	1602	690	798	1176	993	1041	360	1347	297	1791	486	1398	894	69	66	72	69	72	72	72	72	75	72	75	0	72	0	75	69	72	69	69
Amphiura_digitula2	NC_042738.1	Amphiuridae	C1	Shallow	Shallow	Shallow	Shallow	Shallow	16291	11391	13	2343	2	1554	22	699	129	1602	690	798	1146	999	1047	360	1359	297	1782	483	1443	900	66	69	72	66	72	66	72	72	75	72	75	0	72	0	75	66	72	69	69
Amphiura_sinicola	NC_045938.1	Amphiuridae	C1	Shallow	Shallow	Shallow	Shallow	Shallow	15348	11343	13	2247	2	1548	22	693	114	1602	687	798	1143	999	1011	360	1359	297	1800	480	1356	891	66	66	69	69	72	66	72	72	66	75	72	0	72	0	72	69	75	69	69
Histampica_haimaensis	MZ442339.1	Ophiothamnidae	C2	Deep	DeepAnt	Seep	Seep	Seep	15759	11391	13	2244	2	1515	22	693	171	1608	696	798	1140	975	1038	345	1353	294	1797	483	1356	888	66	63	66	63	72	63	66	72	72	72	75	0	69	0	72	69	69	63	69
Ophiopholis_aculeata	NC_005334.1	Ophiopholidae	C2	Deep	DeepAnt	Deep	DeepAnt	Deep	16472	11397	13	2304	2	1560	22	684	174	1587	696	795	1146	999	1059	345	1359	291	1782	480	1419	885	66	69	69	66	72	69	69	72	72	72	75	0	72	0	75	69	72	66	69
Ophiopholis_japonica2	NC_045939.1	Ophiopholidae	C2	Deep	DeepAnt	Deep	DeepAnt	Deep	16214	11421	13	2295	2	1563	22	684	174	1617	696	798	1143	1005	1044	342	1359	294	1785	480	1410	885	66	66	69	69	72	72	72	72	72	75	75	0	69	0	75	69	72	63	72
Ophiopholis_mirabilis	NC_045940.1	Ophiopholidae	C2	Shallow	Shallow	Shallow	Shallow	Shallow	16398	11415	13	2313	2	1552	22	684	171	1617	696	798	1143	999	1044	345	1359	294	1785	480	1419	894	66	64	69	66	72	66	69	72	75	72	75	0	72	0	75	69	72	69	72
Ophiophthalmus_serratus	SCP60	Ophiacanthidae	C4	Deep	DeepAnt	Seep	Seep	Seep	16705	11448	13	2266	2	1593	23	690	162	1587	729	789	1167	990	1065	351	1368	300	1764	486	1369	897	63	69	72	66	69	66	66	72	72	72	75	0	72	72	72	66	72	63	69
Ophiacantha_linea	NC_023254.1	Ophiacanthidae	C4	Deep	DeepAnt	Deep	DeepAnt	Deep	15845	11439	13	2289	2	1524	22	699	177	1599	690	795	1143	984	1065	360	1368	297	1782	480	1401	888	66	63	69	69	72	63	66	72	69	75	75	0	72	0	72	69	72	66	69
Ophiocomina_nigra	FN562577.1	Ophiotomidae	C4	Shallow	Shallow	Shallow	Shallow	Shallow	17383	11442	13	2373	2	1551	22	693	165	1590	690	798	1197	993	1044	354	1371	297	1791	459	1435	938	72	66	69	66	72	66	66	72	75	72	75	0	69	0	72	69	72	72	69
Ophiomastix_mixta	NC_045937.1	Ophiocomidae	C4	Shallow	Shallow	Shallow	Shallow	Shallow	16495	11406	13	2298	2	1548	22	687	168	1590	696	798	1143	999	1041	348	1362	297	1788	489	1395	903	66	63	69	66	72	69	75	72	72	72	75	0	69	0	72	69	75	72	63
Ophiarachnella_gorgonia	NC_046053.1	Ophiodermatidae	C4	Shallow	Shallow	Shallow	Shallow	Shallow	15948	11391	13	2358	2	1566	22	687	165	1593	693	798	1146	993	1038	354	1365	297	1779	483	1440	918	66	66	66	69	72	72	72	75	75	72	75	0	69	0	72	69	72	75	72
Ophioplocus_incipiens	NC_040148.1	Hemieuryalidae	C3	Deep	DeepAnt	Deep	DeepAnt	Deep	18107	11421	13	2232	2	1512	22	696	168	1608	684	798	1137	981	1056	357	1359	297	1797	483	1362	870	63	63	66	66	66	66	69	72	72	66	75	0	72	0	72	66	72	69	69
Ophionotus_victoriae	NC_040149.1	Ophiuridae	C5	Deep	DeepAnt	Deep	DeepAnt	Deep	15932	11457	13	2262	2	1533	22	696	165	1605	693	798	1146	1011	1056	354	1362	297	1794	480	1368	894	66	66	72	66	72	69	69	72	72	69	72	0	72	0	72	66	72	69	69
Gorgonocephalus_chilensis	NC_040147.1	Gorgonocephalidae	C6	Deep	DeepAnt	Deep	DeepAnt	Deep	16361	11415	13	2322	2	1551	22	687	162	1608	693	795	1143	996	1059	354	1365	297	1776	480	1425	897	72	72	69	69	75	69	75	72	72	66	75	0	69	0	72	66	72	69	69
Astrohamma_tuberculatum	MH671876.1	Gorgonocephalidae	C6	Shallow	DeepAnt	Shallow	DeepAnt	Antartic	16438	11448	13	2316	2	1527	22	702	159	1614	693	795	1146	996	1059	354	1365	297	1788	480	1425	891	69	72	69	69	69	69	72	60	72	69	75	0	69	0	72	66	72	69	69
Astrospartus_mediterraneus	NC_013878.1	Gorgonocephalidae	C6	Shallow	Shallow	Shallow	Shallow	Shallow	16238	11418	13	2370	2	1528	22	693	162	1599	690	795	1146	993	1065	354	1374	297	1770	480	1476	894	69	66	66	66	72	66	72	72	69	69	75	0	69	0	72	66	72	69	67
Astrotoma_agassizii2	NC_040146.1	Gorgonocephalidae	C6	Deep	DeepAnt	Deep	DeepAnt	Deep	16464	11412	13	2286	2	1539	22	690	159	1608	693	795	1146	996	1053	354	1365	297	1776	480	1392	894	69	69	66	69	72	69	75	72	72	69	75	0	69	0	72	66	72	69	69
Ophiosteira_antarctica	NC_040151.1	Ophiopyrgidae	C5	Shallow	DeepAnt	Shallow	DeepAnt	Antartic	16979	11511	13	2250	2	1482	22	696	162	1605	693	798	1140	999	1053	354	1365	297	1845	504	1359	891	66	66	69	66	66	66	69	60	69	60	72	0	69	0	72	63	72	69	69
Ophiosteira_sp	MH671884.1	Ophiopyrgidae	C5	Shallow	DeepAnt	Shallow	DeepAnt	Antartic	16664	11451	13	2238	2	1500	22	696	162	1605	693	798	1140	999	1053	354	1362	297	1794	498	1350	888	66	63	69	66	69	66	69	60	69	63	75	0	72	0	72	66	72	69	69
Ophioplinthus_brevirima	NC_040150.1	Ophiopyrgidae	C5	Deep	DeepAnt	Deep	DeepAnt	Deep	15967	11397	13	2232	2	1542	23	693	162	1605	693	798	1140	996	1050	354	1362	297	1782	465	1344	888	66	63	69	60	66	66	69	75	66	63	72	51	69	0	72	63	72	69	69
Ophioplinthus_gelida	NC_040145.1	Ophiopyrgidae	C5	Deep	DeepAnt	Deep	DeepAnt	Deep	18387	11388	13	2283	2	1512	22	699	165	1605	693	798	1140	981	1047	351	1365	297	1794	453	1386	897	66	66	69	69	69	69	66	72	66	63	72	0	69	0	72	63	72	72	69
Ophioplocus_japonicus	NC_044109.1	Hemieuryalidae	C3	Shallow	Shallow	Shallow	Shallow	Shallow	16144	11460	13	2319	2	1551	22	696	165	1602	693	795	1143	1005	1062	354	1362	297	1803	483	1419	900	69	66	72	66	72	69	69	72	69	72	75	0	72	0	75	69	72	69	66
Ophiura_albida	NC_010691.1	Ophiuridae	C5	Shallow	Shallow	Shallow	Shallow	Shallow	16580	11436	13	2304	2	1515	22	702	162	1605	693	798	1143	1002	1056	354	1362	297	1788	474	1404	900	63	63	72	66	72	66	69	72	69	69	69	0	69	0	72	66	69	69	69
Ophiuroglypha_kinbergi	NC_052742.1	Ophiopyrgidae	C5	Shallow	Shallow	Shallow	Shallow	Shallow	16521	11400	13	2286	2	1524	22	696	162	1599	693	798	1140	996	1056	354	1362	297	1767	480	1398	888	66	66	69	66	72	69	69	75	72	66	72	0	69	0	72	66	72	66	66
Ophiura_lutkeni	NC_005930.1	Ophiuridae	C5	Shallow	Shallow	Shallow	Shallow	Shallow	17329	11481	13	2316	2	1527	22	708	168	1605	714	798	1143	1002	1056	354	1362	297	1794	480	1419	897	69	63	69	66	72	69	69	72	75	69	69	0	69	0	72	66	72	69	69
Ophiura_sarsii	NC_044861.1	Ophiuridae	C5	Shallow	Shallow	Shallow	Shallow	Shallow	16603	11451	13	2664	2	1515	22	705	162	1605	693	798	1143	1002	1056	354	1362	297	1794	480	1770	894	69	63	72	66	72	66	69	72	72	66	69	0	69	0	72	69	69	69	69
[truncated: 5 more columns]

## Sheet: nuc_perc
ID	Family	Clade	D1	D2	D3	D4	D5	GeneID	AorT	CorG	G_skew((G-C)/(G+C))	T_skew((T-A)/(T+A))	A	T	C	G	AA	AC	AG	AT	CA	CC	CG	CT	GA	GC	GG	GT	TA	TC	TG	TT
Acanthaster_brevispinus	.	.	OG	OG	OG	OG	OG	ATP6	55.7	44.3	-0.381107	-0.056995	29.437	26.263	30.592	13.709	7.876	4.986	7.442	7.514	5.202	7.225	2.312	7.442	5.925	4.046	7.225	4.986	8.815	5.925	5.202	7.876
Amphiura_sp	Amphiuridae	C1	Deep	DeepAnt	Seep	Seep	Seep	ATP6	61.739	38.261	-0.393939	-0.079812	33.333	28.406	26.667	11.594	10.74	4.427	7.402	8.273	4.499	5.806	1.451	7.402	5.588	3.338	5.806	4.427	10.015	5.588	4.499	10.74
Amphiura_sp_JN-2020	Amphiuridae	C1	Deep	DeepAnt	Deep	DeepAnt	Antartic	ATP6	59.795	40.205	-0.272727	-0.026895	30.702	29.094	25.585	14.62	10.395	4.758	7.687	7.028	4.832	6.296	1.318	7.687	5.124	3.953	6.296	4.758	9.517	5.124	4.832	10.395
Amphioplus_laevis	Amphiuridae	C1	Shallow	Shallow	Shallow	Shallow	Shallow	ATP6	61.76	38.24	-0.245283	0.074766	28.571	33.189	23.81	14.43	10.838	4.335	7.731	7.948	5.058	5.058	1.301	7.731	6.142	3.613	5.058	4.335	8.815	6.142	5.058	10.838
Amphipholis_squamata	Amphiuridae	C1	Shallow	Shallow	Shallow	Shallow	Shallow	ATP6	68.567	31.433	-0.209302	0.061834	32.164	36.404	19.006	12.427	12.299	4.026	7.54	10.395	4.319	3.148	0.732	7.54	5.783	2.782	3.148	4.026	11.859	5.783	4.319	12.299
Amphiura_digitula2	Amphiuridae	C1	Shallow	Shallow	Shallow	Shallow	Shallow	ATP6	62.661	37.339	-0.394636	0.050228	29.757	32.904	26.037	11.302	11.676	4.871	6.734	8.023	4.585	5.659	1.719	6.734	5.444	2.722	5.659	4.871	9.599	5.444	4.585	11.676
Amphiura_sinicola	Amphiuridae	C1	Shallow	Shallow	Shallow	Shallow	Shallow	ATP6	68.11	31.89	-0.339367	0.059322	32.035	36.075	21.356	10.534	13.15	4.335	6.72	9.827	4.48	3.902	0.867	6.72	4.986	2.746	3.902	4.335	11.416	4.986	4.48	13.15
Histampica_haimaensis	Ophiothamnidae	C2	Deep	DeepAnt	Seep	Seep	Seep	ATP6	64.069	35.931	0.301205	0.310811	22.078	41.991	12.554	23.377	12.934	5.13	5.491	8.526	5.78	5.347	1.301	5.491	4.046	3.468	5.347	5.13	9.249	4.046	5.78	12.934
Ophiopholis_aculeata	Ophiopholidae	C2	Deep	DeepAnt	Deep	DeepAnt	Deep	ATP6	62.719	37.281	-0.192157	-0.034965	32.456	30.263	22.222	15.058	11.054	4.612	6.735	8.931	5.271	5.051	1.611	6.735	5.051	3.953	5.051	4.612	9.956	5.051	5.271	11.054
Ophiopholis_japonica2	Ophiopholidae	C2	Deep	DeepAnt	Deep	DeepAnt	Deep	ATP6	63.45	36.55	-0.12	-0.023041	32.456	30.994	20.468	16.082	11.127	4.685	6.369	9.517	5.271	5.051	1.611	6.369	4.758	3.807	5.051	4.685	10.542	4.758	5.271	11.127
Ophiopholis_mirabilis	Ophiopholidae	C2	Shallow	Shallow	Shallow	Shallow	Shallow	ATP6	60.088	39.912	-0.172161	0.007299	29.825	30.263	23.392	16.52	9.883	5.783	7.321	7.028	5.198	5.124	2.343	7.321	4.832	4.246	5.124	5.783	10.102	4.832	5.198	9.883
Ophiophthalmus_sp	Ophiacanthidae	C4	Deep	DeepAnt	Seep	Seep	Seep	ATP6	70.145	29.855	-0.300971	-0.012397	35.507	34.638	19.42	10.435	14.224	3.991	5.37	11.466	5.298	3.556	0.726	5.37	4.354	3.048	3.556	3.991	11.176	4.354	5.298	14.224
Ophiacantha_linea	Ophiacanthidae	C4	Deep	DeepAnt	Deep	DeepAnt	Deep	ATP6	69.385	30.615	-0.205607	0.030928	33.619	35.765	18.455	12.16	13.754	3.582	6.447	10.888	4.155	3.438	1.289	6.447	5.587	2.722	3.438	3.582	11.175	5.587	4.155	13.754
Ophiocomina_nigra	Ophiotomidae	C4	Shallow	Shallow	Shallow	Shallow	Shallow	ATP6	61.039	38.961	-0.2	-0.078014	32.9	28.139	23.377	15.584	9.754	5.13	7.009	8.671	5.419	5.202	1.879	7.009	5.491	3.613	5.202	5.13	9.827	5.491	5.419	9.754
Ophiomastix_mixta	Ophiocomidae	C4	Shallow	Shallow	Shallow	Shallow	Shallow	ATP6	60.262	39.738	-0.428571	-0.028986	31.004	29.258	28.384	11.354	10.933	5.685	7.507	5.977	5.758	5.612	1.02	7.507	5.831	2.77	5.612	5.685	7.58	5.831	5.758	10.933
Ophiarachnella_gorgonia	Ophiodermatidae	C4	Shallow	Shallow	Shallow	Shallow	Shallow	ATP6	65.211	34.789	-0.405858	-0.236607	40.32	24.891	24.454	10.335	12.536	4.592	6.851	8.601	4.665	5.029	0.875	6.851	5.321	2.478	5.029	4.592	10.058	5.321	4.665	12.536
Ophioplocus_incipiens	Hemieuryalidae	C3	Deep	DeepAnt	Deep	DeepAnt	Deep	ATP6	59.914	40.086	-0.333333	0.074341	27.73	32.184	26.724	13.362	10.791	4.101	7.41	7.626	4.173	6.475	2.014	7.41	6.043	3.453	6.475	4.101	8.921	6.043	4.173	10.791
Ophionotus_victoriae	Ophiuridae	C5	Deep	DeepAnt	Deep	DeepAnt	Deep	ATP6	67.241	32.759	-0.192982	0.068376	31.322	35.92	19.54	13.218	12.446	4.388	7.698	9.065	4.748	3.237	0.719	7.698	5.468	3.309	3.237	4.388	10.935	5.468	4.748	12.446
Gorgonocephalus_chilensis	Gorgonocephalidae	C6	Deep	DeepAnt	Deep	DeepAnt	Deep	ATP6	75.109	24.891	-0.239766	-0.120155	42.067	33.042	15.429	9.461	17.42	3.863	5.466	10.787	3.79	2.478	0.729	5.466	4.665	1.458	2.478	3.863	11.662	4.665	3.79	17.42
Astrohamma_tuberculatum	Gorgonocephalidae	C6	Shallow	DeepAnt	Shallow	DeepAnt	Antartic	ATP6	76.923	23.077	-0.234568	-0.1	42.308	34.615	14.245	8.832	17.76	3.78	6.277	10.699	2.924	1.926	0.428	6.277	4.422	1.427	1.926	3.78	13.267	4.422	2.924	17.76
Astrospartus_mediterraneus	Gorgonocephalidae	C6	Shallow	Shallow	Shallow	Shallow	Shallow	ATP6	72.727	27.273	-0.396825	-0.138889	41.414	31.313	19.048	8.225	16.185	3.613	6.575	9.971	3.685	2.962	0.434	6.575	5.636	1.445	2.962	3.613	10.838	5.636	3.685	16.185
Astrotoma_agassizii2	Gorgonocephalidae	C6	Deep	DeepAnt	Deep	DeepAnt	Deep	ATP6	75.797	24.203	-0.281437	-0.120459	42.464	33.333	15.507	8.696	17.489	3.701	5.08	11.611	3.846	2.467	0.726	5.08	4.644	1.306	2.467	3.701	11.901	4.644	3.846	17.489
Ophiosteira_antarctica	Ophiopyrgidae	C5	Shallow	DeepAnt	Shallow	DeepAnt	Antartic	ATP6	71.264	28.736	-0.21	0.072581	33.046	38.218	17.385	11.351	12.95	3.597	7.122	11.942	4.317	2.374	0.576	7.122	5.827	2.59	2.374	3.597	12.518	5.827	4.317	12.95
Ophiosteira_sp	Ophiopyrgidae	C5	Shallow	DeepAnt	Shallow	DeepAnt	Antartic	ATP6	69.971	30.029	-0.205742	0.034908	33.764	36.207	18.103	11.925	12.95	3.957	6.835	11.223	4.532	3.094	0.576	6.835	5.54	2.446	3.094	3.957	11.942	5.54	4.532	12.95
Ophioplinthus_brevirima	Ophiopyrgidae	C5	Deep	DeepAnt	Deep	DeepAnt	Deep	ATP6	71.14	28.86	-0.23	-0.026369	36.508	34.632	17.749	11.111	14.451	3.613	6.647	10.838	4.191	3.179	0.434	6.647	5.636	2.023	3.179	3.613	11.272	5.636	4.191	14.451
Ophioplinthus_gelida	Ophiopyrgidae	C5	Deep	DeepAnt	Deep	DeepAnt	Deep	ATP6	67.382	32.618	-0.27193	0.057325	31.76	35.622	20.744	11.874	11.819	3.868	6.948	11.032	5.158	4.083	0.143	6.948	6.089	2.292	4.083	3.868	10.602	6.089	5.158	11.819
Ophioplocus_japonicus	Hemieuryalidae	C3	Shallow	Shallow	Shallow	Shallow	Shallow	ATP6	62.069	37.931	-0.462121	-0.203704	37.356	24.713	27.73	10.201	10.288	5.18	7.338	8.201	5.18	5.755	0.719	7.338	5.18	2.878	5.755	5.18	10.36	5.18	5.18	10.288
Ophiura_albida	Ophiuridae	C5	Shallow	Shallow	Shallow	Shallow	Shallow	ATP6	71.51	28.49	-0.14	0.003984	35.613	35.897	16.239	12.251	14.194	4.494	6.348	10.699	4.422	2.782	0.713	6.348	4.85	2.14	2.782	4.494	12.268	4.85	4.422	14.194
Ophiuroglypha_kinbergi	Ophiopyrgidae	C5	Shallow	Shallow	Shallow	Shallow	Shallow	ATP6	71.264	28.736	-0.12	0.03629	34.339	36.925	16.092	12.644	14.532	4.532	6.906	9.64	4.245	2.518	0.719	6.906	5.18	2.158	2.518	4.532	11.655	5.18	4.245	14.532
Ophiura_lutkeni	Ophiuridae	C5	Shallow	Shallow	Shallow	Shallow	Shallow	ATP6	68.785	31.215	-0.20362	0.002053	34.322	34.463	18.785	12.429	13.296	4.385	6.789	9.901	4.243	3.465	1.132	6.789	5.516	2.263	3.465	4.385	11.315	5.516	4.243	13.296
Ophiura_sarsii	Ophiuridae	C5	Shallow	Shallow	Shallow	Shallow	Shallow	ATP6	68.511	31.489	-0.153153	0.006211	34.043	34.468	18.156	13.333	13.991	4.403	6.321	9.517	4.901	3.693	0.852	6.321	5.256	2.415	3.693	4.403	10.085	5.256	4.901	13.991
Acanthaster_brevispinus	.	.	OG	OG	OG	OG	OG	ATP8	63.636	36.364	-0.433333	-0.219048	38.788	24.848	26.061	10.303	12.195	6.098	7.317	6.098	6.402	4.573	0	7.317	3.354	4.268	4.573	6.098	9.756	3.354	6.402	12.195
Amphiura_sp	Amphiuridae	C1	Deep	DeepAnt	Seep	Seep	Seep	ATP8	65.957	34.043	-0.5	-0.075269	35.461	30.496	25.532	8.511	13.571	3.929	4.643	10.714	6.429	6.071	0	4.643	5	2.143	6.071	3.929	7.857	5	6.429	13.571
Amphiura_sp_JN-2020	Amphiuridae	C1	Deep	DeepAnt	Deep	DeepAnt	Antartic	ATP8	69.298	30.702	-0.314286	-0.037975	35.965	33.333	20.175	10.526	13.717	4.867	7.08	8.85	4.425	3.982	0	7.08	4.867	1.77	3.982	4.867	11.504	4.867	4.425	13.717
Amphioplus_laevis	Amphiuridae	C1	Shallow	Shallow	Shallow	Shallow	Shallow	ATP8	61.481	38.519	-0.307692	-0.156627	35.556	25.926	25.185	13.333	11.567	4.478	7.836	6.716	5.597	5.224	0.746	7.836	5.97	3.731	5.224	4.478	7.463	5.97	5.597	11.567
Amphipholis_squamata	Amphiuridae	C1	Shallow	Shallow	Shallow	Shallow	Shallow	ATP8	69.841	30.159	-0.315789	-0.113636	38.889	30.952	19.841	10.317	12	5.6	6	11.2	8	0.4	0.8	6	5.2	4	0.4	5.6	9.6	5.2	8	12
Amphiura_digitula2	Amphiuridae	C1	Shallow	Shallow	Shallow	Shallow	Shallow	ATP8	68.217	31.783	-0.414634	-0.090909	37.209	31.008	22.481	9.302	15.234	5.078	5.078	8.594	6.641	4.297	0	5.078	4.297	2.344	4.297	5.078	7.812	4.297	6.641	15.234
Amphiura_sinicola	Amphiuridae	C1	Shallow	Shallow	Shallow	Shallow	Shallow	ATP8	74.561	25.439	-0.37931	0.129412	32.456	42.105	17.544	7.895	16.814	2.655	6.195	11.504	3.982	2.655	0	6.195	5.752	1.77	2.655	2.655	10.619	5.752	3.982	16.814
Histampica_haimaensis	Ophiothamnidae	C2	Deep	DeepAnt	Seep	Seep	Seep	ATP8	69.591	30.409	0.153846	0.092437	31.579	38.012	12.865	17.544	15	3.235	5.294	11.176	4.412	4.412	1.176	5.294	6.471	1.176	4.412	3.235	8.824	6.471	4.412	15
Ophiopholis_aculeata	Ophiopholidae	C2	Deep	DeepAnt	Deep	DeepAnt	Deep	ATP8	69.54	30.46	-0.283019	-0.305785	45.402	24.138	19.54	10.92	16.474	4.335	4.046	9.827	5.202	5.491	0.578	4.046	4.335	1.156	5.491	4.335	8.671	4.335	5.202	16.474
Ophiopholis_japonica2	Ophiopholidae	C2	Deep	DeepAnt	Deep	DeepAnt	Deep	ATP8	70.115	29.885	-0.230769	-0.262295	44.253	25.862	18.391	11.494	14.74	4.624	5.78	9.827	6.069	3.179	0	5.78	4.913	2.312	3.179	4.624	9.249	4.913	6.069	14.74
Ophiopholis_mirabilis	Ophiopholidae	C2	Shallow	Shallow	Shallow	Shallow	Shallow	ATP8	67.836	32.164	-0.345455	-0.310345	44.444	23.392	21.637	10.526	14.412	5.294	6.471	7.647	6.176	3.529	0	6.471	3.235	4.118	3.529	5.294	10	3.235	6.176	14.412
Ophiophthalmus_sp	Ophiacanthidae	C4	Deep	DeepAnt	Seep	Seep	Seep	ATP8	81.481	18.519	-0.266667	-0.106061	45.062	36.42	11.728	6.79	18.634	4.348	4.037	13.665	3.106	0.932	1.242	4.037	3.416	0.621	0.932	4.348	15.528	3.416	3.106	18.634
Ophiacantha_linea	Ophiacanthidae	C4	Deep	DeepAnt	Deep	DeepAnt	Deep	ATP8	71.751	28.249	-0.12	-0.055118	37.853	33.898	15.819	12.429	17.045	5.114	3.977	9.659	6.534	3.125	0.568	3.977	2.557	3.409	3.125	5.114	9.659	2.557	6.534	17.045
Ophiocomina_nigra	Ophiotomidae	C4	Shallow	Shallow	Shallow	Shallow	Shallow	ATP8	66.667	33.333	-0.345455	-0.290909	43.03	23.636	22.424	10.909	12.195	7.927	7.012	6.098	7.012	2.744	0	7.012	4.268	1.829	2.744	7.927	9.756	4.268	7.012	12.195
Ophiomastix_mixta	Ophiocomidae	C4	Shallow	Shallow	Shallow	Shallow	Shallow	ATP8	64.286	35.714	-0.566667	-0.185185	38.095	26.19	27.976	7.738	11.078	5.988	4.192	10.778	7.186	4.79	1.796	4.192	4.192	2.994	4.79	5.988	9.581	4.192	7.186	11.078
Ophiarachnella_gorgonia	Ophiodermatidae	C4	Shallow	Shallow	Shallow	Shallow	Shallow	ATP8	75.152	24.848	-0.609756	-0.435484	53.939	21.212	20	4.848	19.207	4.878	4.268	9.146	5.488	2.744	0	4.268	4.268	0.61	2.744	4.878	8.537	4.268	5.488	19.207
Ophioplocus_incipiens	Hemieuryalidae	C3	Deep	DeepAnt	Deep	DeepAnt	Deep	ATP8	61.905	38.095	-0.5	-0.096154	33.929	27.976	28.571	9.524	12.575	3.593	6.886	7.784	4.491	5.988	1.796	6.886	3.593	5.988	5.988	3.593	10.18	3.593	4.491	12.575
Ophionotus_victoriae	Ophiuridae	C5	Deep	DeepAnt	Deep	DeepAnt	Deep	ATP8	69.091	30.909	-0.215686	-0.105263	38.182	30.909	18.788	12.121	12.5	7.622	5.183	9.146	8.537	1.829	0	5.183	3.659	2.439	1.829	7.622	9.756	3.659	8.537	12.5
Gorgonocephalus_chilensis	Gorgonocephalidae	C6	Deep	DeepAnt	Deep	DeepAnt	Deep	ATP8	82.099	17.901	-0.448276	-0.263158	51.852	30.247	12.963	4.938	20.186	3.416	5.59	11.801	2.795	0.621	0	5.59	4.348	0.621	0.621	3.416	13.665	4.348	2.795	20.186
Astrohamma_tuberculatum	Gorgonocephalidae	C6	Shallow	DeepAnt	Shallow	DeepAnt	Antartic	ATP8	80.503	19.497	-0.096774	-0.140625	45.912	34.591	10.692	8.805	18.671	2.848	4.114	14.557	3.797	1.899	0	4.114	4.43	0.633	1.899	2.848	13.291	4.43	3.797	18.671
Astrospartus_mediterraneus	Gorgonocephalidae	C6	Shallow	Shallow	Shallow	Shallow	Shallow	ATP8	76.543	23.457	-0.631579	-0.274194	48.765	27.778	19.136	4.321	19.876	3.416	4.969	9.938	4.348	2.484	0	4.969	5.28	0.621	2.484	3.416	8.696	5.28	4.348	19.876
Astrotoma_agassizii2	Gorgonocephalidae	C6	Deep	DeepAnt	Deep	DeepAnt	Deep	ATP8	76.73	23.27	-0.135135	-0.229508	47.17	29.56	13.208	10.063	18.987	2.532	4.747	12.025	4.747	2.215	0	4.747	6.329	0.633	2.215	2.532	8.228	6.329	4.747	18.987
Ophiosteira_antarctica	Ophiopyrgidae	C5	Shallow	DeepAnt	Shallow	DeepAnt	Antartic	ATP8	75.926	24.074	-0.333333	-0.073171	40.741	35.185	16.049	8.025	15.217	4.969	5.28	12.422	4.969	1.863	0	5.28	4.037	1.242	1.863	4.969	13.665	4.037	4.969	15.217
Ophiosteira_sp	Ophiopyrgidae	C5	Shallow	DeepAnt	Shallow	DeepAnt	Antartic	ATP8	77.778	22.222	-0.277778	-0.079365	41.975	35.802	14.198	8.025	15.839	5.28	4.037	13.665	5.28	1.863	0	4.037	3.416	0.621	1.863	5.28	14.286	3.416	5.28	15.839
Ophioplinthus_brevirima	Ophiopyrgidae	C5	Deep	DeepAnt	Deep	DeepAnt	Deep	ATP8	74.074	25.926	-0.428571	-0.216667	45.062	29.012	18.519	7.407	16.149	5.901	5.59	9.317	5.901	1.553	0	5.59	4.348	1.242	1.553	5.901	10.559	4.348	5.901	16.149
Ophioplinthus_gelida	Ophiopyrgidae	C5	Deep	DeepAnt	Deep	DeepAnt	Deep	ATP8	69.091	30.909	-0.568627	0.157895	29.091	40	24.242	6.667	13.415	4.878	6.402	9.756	4.878	3.659	0.61	6.402	5.793	1.22	3.659	4.878	10.366	5.793	4.878	13.415
Ophioplocus_japonicus	Hemieuryalidae	C3	Shallow	Shallow	Shallow	Shallow	Shallow	ATP8	73.333	26.667	-0.545455	-0.322314	48.485	24.848	20.606	6.061	17.378	5.183	5.488	8.537	4.268	3.049	0.61	5.488	4.573	0.61	3.049	5.183	10.366	4.573	4.268	17.378
Ophiura_albida	Ophiuridae	C5	Shallow	Shallow	Shallow	Shallow	Shallow	ATP8	79.63	20.37	-0.212121	-0.193798	47.531	32.099	12.346	8.025	18.634	4.348	3.727	13.043	5.59	0.932	0	3.727	3.106	1.863	0.932	4.348	12.422	3.106	5.59	18.634
Ophiuroglypha_kinbergi	Ophiopyrgidae	C5	Shallow	Shallow	Shallow	Shallow	Shallow	ATP8	76.543	23.457	-0.210526	-0.096774	41.975	34.568	14.198	9.259	16.149	3.727	5.901	12.422	4.658	1.242	0	5.901	6.211	0.621	1.242	3.727	11.18	6.211	4.658	16.149
Ophiura_lutkeni	Ophiuridae	C5	Shallow	Shallow	Shallow	Shallow	Shallow	ATP8	76.786	23.214	-0.179487	-0.24031	47.619	29.167	13.69	9.524	17.665	5.689	4.79	10.18	5.988	0.299	0.599	4.79	4.491	1.198	0.299	5.689	10.18	4.491	5.988	17.665
Ophiura_sarsii	Ophiuridae	C5	Shallow	Shallow	Shallow	Shallow	Shallow	ATP8	68.519	31.481	-0.176471	-0.189189	40.741	27.778	18.519	12.963	15.839	6.522	4.348	7.453	8.075	2.795	0.621	4.348	5.28	1.242	2.795	6.522	4.969	5.28	8.075	15.839
Acanthaster_brevispinus	.	.	OG	OG	OG	OG	OG	COX1	53.668	46.332	-0.197222	0.01199	26.512	27.156	27.735	18.597	6.632	5.634	6.665	7.92	6.504	6.922	3.091	6.665	6.568	4.057	6.922	5.634	7.083	6.568	6.504	6.632
Amphiura_sp	Amphiuridae	C1	Deep	DeepAnt	Seep	Seep	Seep	COX1	56.429	43.571	-0.252149	-0.037611	29.276	27.154	27.278	16.292	8.276	4.841	6.34	8.745	5.903	6.683	2.873	6.34	6.465	3.81	6.683	4.841	7.558	6.465	5.903	8.276
Amphiura_sp_JN-2020	Amphiuridae	C1	Deep	DeepAnt	Deep	DeepAnt	Antartic	COX1	58.177	41.823	-0.179104	0.01073	28.777	29.401	24.657	17.166	8.651	5.809	6.433	8.182	6.059	6.309	2.124	6.433	5.184	3.623	6.309	5.809	9.182	5.184	6.059	8.651
Amphioplus_laevis	Amphiuridae	C1	Shallow	Shallow	Shallow	Shallow	Shallow	COX1	56.973	43.027	-0.148256	0.097695	25.704	31.27	24.703	18.324	8.542	5.601	6.821	7.509	5.695	6.383	2.628	6.821	6.414	3.129	6.383	5.601	7.822	6.414	5.695	8.542
Amphipholis_squamata	Amphiuridae	C1	Shallow	Shallow	Shallow	Shallow	Shallow	COX1	62.484	37.516	-0.12812	0.058941	29.401	33.084	21.161	16.355	9.151	4.934	6.34	10.806	6.402	4.403	1.624	6.34	6.184	3.248	4.403	4.934	9.494	6.184	6.402	9.151
Amphiura_digitula2	Amphiuridae	C1	Shallow	Shallow	Shallow	Shallow	Shallow	COX1	57.241	42.759	-0.220438	0.079607	26.342	30.899	26.092	16.667	9.244	5.153	6.09	8.12	5.809	6.683	2.811	6.09	6.184	3.373	6.683	5.153	7.37	6.184	5.809	9.244
Amphiura_sinicola	Amphiuridae	C1	Shallow	Shallow	Shallow	Shallow	Shallow	COX1	62.172	37.828	-0.148515	0.094378	28.152	34.02	21.723	16.105	11.024	5.247	5.871	8.932	6.152	5.215	1.686	5.871	5.715	2.748	5.215	5.247	8.182	5.715	6.152	11.024
Histampica_haimaensis	Ophiothamnidae	C2	Deep	DeepAnt	Seep	Seep	Seep	COX1	58.955	41.045	0.054545	0.21519	23.134	35.821	19.403	21.642	10.672	4.325	4.605	9.894	6.223	6.876	2.8	4.605	4.947	4.356	6.876	4.325	7.654	4.947	6.223	10.672
Ophiopholis_aculeata	Ophiopholidae	C2	Deep	DeepAnt	Deep	DeepAnt	Deep	COX1	60.365	39.635	-0.125596	0.020877	29.553	30.813	22.306	17.328	9.647	5.107	6.116	9.332	6.368	5.265	2.081	6.116	5.643	3.783	5.265	5.107	8.512	5.643	6.368	9.647
Ophiopholis_japonica2	Ophiopholidae	C2	Deep	DeepAnt	Deep	DeepAnt	Deep	COX1	62.523	37.477	-0.066007	0.024728	30.489	32.035	19.975	17.502	10.427	4.95	5.941	9.963	6.188	4.827	1.795	5.941	5.476	3.465	4.827	4.95	9.158	5.476	6.188	10.427
Ophiopholis_mirabilis	Ophiopholidae	C2	Shallow	Shallow	Shallow	Shallow	Shallow	COX1	59.74	40.26	-0.078341	0.026915	29.066	30.674	21.707	18.553	10.087	5.26	6.064	8.478	6.095	5.322	2.661	6.064	5.693	3.837	5.322	5.26	7.983	5.693	6.095	10.087
Ophiophthalmus_sp	Ophiacanthidae	C4	Deep	DeepAnt	Seep	Seep	Seep	COX1	64.524	35.476	-0.047957	-0.005859	32.451	32.073	18.589	16.887	11.223	4.729	5.769	10.53	5.895	4.634	1.45	5.769	5.359	3.026	4.634	4.729	9.773	5.359	5.895	11.223
Ophiacantha_linea	Ophiacanthidae	C4	Deep	DeepAnt	Deep	DeepAnt	Deep	COX1	62.414	37.586	-0.071547	0.012024	30.832	31.582	20.138	17.448	10.638	4.599	5.695	10.263	5.538	5.507	2.065	5.695	5.382	3.317	5.507	4.599	9.637	5.382	5.538	10.638
Ophiocomina_nigra	Ophiotomidae	C4	Shallow	Shallow	Shallow	Shallow	Shallow	COX1	57.925	42.075	-0.121076	-0.040174	30.126	27.799	23.585	18.491	8.685	5.695	6.073	8.496	6.199	6.136	2.643	6.073	5.255	3.965	6.136	5.695	8.811	5.255	6.199	8.685
Ophiomastix_mixta	Ophiocomidae	C4	Shallow	Shallow	Shallow	Shallow	Shallow	COX1	56.792	43.208	-0.260553	0.016611	27.925	28.868	27.233	15.975	8.716	5.57	6.545	7.552	6.293	5.884	2.895	6.545	6.199	3.965	5.884	5.57	7.174	6.199	6.293	8.716
Ophiarachnella_gorgonia	Ophiodermatidae	C4	Shallow	Shallow	Shallow	Shallow	Shallow	COX1	56.685	43.315	-0.24058	-0.218162	34.526	22.159	26.868	16.447	7.695	5.999	6.47	8.166	6.91	6.03	2.261	6.47	6.25	3.392	6.03	5.999	7.475	6.25	6.91	7.695
Ophioplocus_incipiens	Hemieuryalidae	C3	Deep	DeepAnt	Deep	DeepAnt	Deep	COX1	55.286	44.714	-0.22114	0.001125	27.612	27.674	27.301	17.413	7.996	4.76	7.032	7.841	5.414	7.25	2.676	7.032	6.067	4.294	7.25	4.76	8.152	6.067	5.414	7.996
Ophionotus_victoriae	Ophiuridae	C5	Deep	DeepAnt	Deep	DeepAnt	Deep	COX1	61.869	38.131	-0.039216	0.131923	26.854	35.016	19.813	18.318	10.973	4.551	5.549	9.85	5.985	5.736	1.808	5.549	5.05	3.741	5.736	4.551	8.915	5.05	5.985	10.973
Gorgonocephalus_chilensis	Gorgonocephalidae	C6	Deep	DeepAnt	Deep	DeepAnt	Deep	COX1	65.858	34.142	-0.092896	-0.023607	33.706	32.152	18.657	15.485	12.197	4.543	5.787	10.392	5.725	4.325	1.245	5.787	5.663	2.551	4.325	4.543	9.334	5.663	5.725	12.197
Astrohamma_tuberculatum	Gorgonocephalidae	C6	Shallow	DeepAnt	Shallow	DeepAnt	Antartic	COX1	66.791	33.209	-0.093284	-0.079777	36.059	30.731	18.154	15.056	11.934	4.154	6.014	11.283	5.27	4.03	1.302	6.014	5.828	2.604	4.03	4.154	10.353	5.828	5.27	11.934
Astrospartus_mediterraneus	Gorgonocephalidae	C6	Shallow	Shallow	Shallow	Shallow	Shallow	COX1	64.603	35.397	-0.159011	-0.076476	34.772	29.831	20.513	14.884	11.389	5.1	5.695	10.138	6.008	4.318	1.69	5.695	5.695	2.566	4.318	5.1	9.199	5.695	6.008	11.389
Astrotoma_agassizii2	Gorgonocephalidae	C6	Deep	DeepAnt	Deep	DeepAnt	Deep	COX1	65.734	34.266	-0.139746	-0.099338	36.132	29.602	19.527	14.739	11.792	4.356	5.694	11.014	5.6	4.605	1.245	5.694	5.756	2.427	4.605	4.356	9.708	5.756	5.6	11.792
Ophiosteira_antarctica	Ophiopyrgidae	C5	Shallow	DeepAnt	Shallow	DeepAnt	Antartic	COX1	62.43	37.57	-0.064677	0.073852	28.91	33.52	20	17.57	10.411	4.084	6.359	10.349	5.393	5.299	1.746	6.359	5.673	3.741	5.299	4.084	9.726	5.673	5.393	10.411
Ophiosteira_sp	Ophiopyrgidae	C5	Shallow	DeepAnt	Shallow	DeepAnt	Antartic	COX1	63.178	36.822	-0.055838	0.084813	28.91	34.268	19.439	17.383	10.754	4.333	5.704	10.786	5.455	5.954	1.309	5.704	5.143	2.993	5.954	4.333	10.224	5.143	5.455	10.754
Ophioplinthus_brevirima	Ophiopyrgidae	C5	Deep	DeepAnt	Deep	DeepAnt	Deep	COX1	64.174	35.826	-0.092174	0.071845	29.782	34.393	19.564	16.262	11.066	4.551	6.297	10.162	5.829	4.863	0.935	6.297	5.58	2.93	4.863	4.551	9.601	5.58	5.829	11.066
Ophioplinthus_gelida	Ophiopyrgidae	C5	Deep	DeepAnt	Deep	DeepAnt	Deep	COX1	61.246	38.754	-0.131833	0.11292	27.165	34.081	21.931	16.822	9.975	4.52	6.515	9.601	5.486	5.829	1.559	6.515	4.925	4.115	5.829	4.52	10.224	4.925	5.486	9.975
Ophioplocus_japonicus	Hemieuryalidae	C3	Shallow	Shallow	Shallow	Shallow	Shallow	COX1	58.052	41.948	-0.264881	-0.163441	33.77	24.282	26.529	15.418	8.62	5.59	6.621	8.182	6.027	6.277	2.061	6.621	6.121	2.998	6.277	5.59	8.245	6.121	6.027	8.62
Ophiura_albida	Ophiuridae	C5	Shallow	Shallow	Shallow	Shallow	Shallow	COX1	65.234	34.766	-0.010753	0.121299	28.66	36.573	17.57	17.196	11.378	4.582	5.673	10.973	6.079	4.333	1.309	5.673	5.175	3.304	4.333	4.582	9.975	5.175	6.079	11.378
Ophiuroglypha_kinbergi	Ophiopyrgidae	C5	Shallow	Shallow	Shallow	Shallow	Shallow	COX1	64.165	35.835	-0.005236	0.105263	28.705	35.46	18.011	17.824	11.389	4.443	6.446	9.825	5.476	4.631	1.377	6.446	5.695	3.129	4.631	4.443	9.512	5.695	5.476	11.389
Ophiura_lutkeni	Ophiuridae	C5	Shallow	Shallow	Shallow	Shallow	Shallow	COX1	61.558	38.442	-0.069692	0.036437	29.657	31.9	20.561	17.882	10.567	5.081	5.393	9.726	6.079	5.892	1.87	5.393	5.081	3.18	5.892	5.081	9.04	5.081	6.079	10.567
Ophiura_sarsii	Ophiuridae	C5	Shallow	Shallow	Shallow	Shallow	Shallow	COX1	62.679	37.321	-0.038397	0.091451	28.474	34.206	19.377	17.944	11.004	5.143	6.016	9.165	5.517	4.894	2.244	6.016	5.33	3.304	4.894	5.143	9.476	5.33	5.517	11.004
Acanthaster_brevispinus	.	.	OG	OG	OG	OG	OG	COX2	55.942	44.058	-0.269737	-0.07772	30.145	25.797	27.971	16.087	7.837	4.935	6.386	8.853	5.806	6.531	3.338	6.386	6.967	3.628	6.531	4.935	7.257	6.967	5.806	7.837
Amphiura_sp	Amphiuridae	C1	Deep	DeepAnt	Seep	Seep	Seep	COX2	59.307	40.693	-0.184397	-0.104623	32.756	26.551	24.098	16.595	8.743	5.13	6.358	9.393	6.431	5.13	2.457	6.358	6.214	3.902	5.13	5.13	8.237	6.214	6.431	8.743
Amphiura_sp_JN-2020	Amphiuridae	C1	Deep	DeepAnt	Deep	DeepAnt	Antartic	COX2	60.29	39.71	-0.20438	-0.0625	32.029	28.261	23.913	15.797	9.144	5.443	6.313	9.289	5.515	5.225	2.758	6.313	5.878	3.338	5.225	5.443	9.579	5.878	5.515	9.144
Amphioplus_laevis	Amphiuridae	C1	Shallow	Shallow	Shallow	Shallow	Shallow	COX2	58.986	41.014	-0.088339	-0.017199	30	28.986	22.319	18.696	9.361	5.66	7.112	7.402	6.241	4.717	2.467	7.112	6.459	3.628	4.717	5.66	7.402	6.459	6.241	9.361
Amphipholis_squamata	Amphiuridae	C1	Shallow	Shallow	Shallow	Shallow	Shallow	COX2	64.058	35.942	-0.112903	0.013575	31.594	32.464	20	15.942	10.305	5.37	6.168	10.16	5.951	3.846	2.032	6.168	6.459	2.322	3.846	5.37	9.289	6.459	5.951	10.305
Amphiura_digitula2	Amphiuridae	C1	Shallow	Shallow	Shallow	Shallow	Shallow	COX2	57.971	42.029	-0.186207	-0.105	32.029	25.942	24.928	17.101	8.345	5.806	5.951	8.853	6.241	5.951	2.903	5.951	6.531	2.758	5.951	5.806	7.837	6.531	6.241	8.345
Amphiura_sinicola	Amphiuridae	C1	Shallow	Shallow	Shallow	Shallow	Shallow	COX2	65.066	34.934	-0.125	0.006711	32.314	32.751	19.651	15.284	11.224	4.81	6.414	10.058	4.81	4.082	2.187	6.414	6.122	2.478	4.082	4.81	10.35	6.122	4.81	11.224
Histampica_haimaensis	Ophiothamnidae	C2	Deep	DeepAnt	Seep	Seep	Seep	COX2	59.195	40.805	0.056338	0.116505	26.149	33.046	19.253	21.552	10	4.892	5.108	9.64	7.05	5.54	2.734	5.108	6.187	3.741	5.54	4.892	6.331	6.187	7.05	10
Ophiopholis_aculeata	Ophiopholidae	C2	Deep	DeepAnt	Deep	DeepAnt	Deep	COX2	60.92	39.08	-0.139706	-0.084906	33.046	27.874	22.27	16.81	8.921	5.899	6.547	9.065	6.259	4.173	2.59	6.547	6.331	3.165	4.173	5.899	8.921	6.331	6.259	8.921
Ophiopholis_japonica2	Ophiopholidae	C2	Deep	DeepAnt	Deep	DeepAnt	Deep	COX2	63.362	36.638	-0.07451	-0.047619	33.19	30.172	19.684	16.954	11.223	5.827	5.827	8.777	6.403	3.813	2.302	5.827	5.827	2.878	3.813	5.827	8.201	5.827	6.403	11.223
Ophiopholis_mirabilis	Ophiopholidae	C2	Shallow	Shallow	Shallow	Shallow	Shallow	COX2	58.621	41.379	-0.069444	-0.068627	31.322	27.299	22.126	19.253	9.065	6.043	6.115	8.058	6.259	4.892	3.453	6.115	5.612	4.173	4.892	6.043	8.345	5.612	6.259	9.065
Ophiophthalmus_sp	Ophiacanthidae	C4	Deep	DeepAnt	Seep	Seep	Seep	COX2	67.49	32.51	-0.147679	-0.105691	37.311	30.178	18.656	13.855	12.225	4.327	5.22	11.951	5.014	3.846	2.198	5.22	5.22	2.885	3.846	4.327	11.264	5.22	5.014	12.225
Ophiacantha_linea	Ophiacanthidae	C4	Deep	DeepAnt	Deep	DeepAnt	Deep	COX2	67.246	32.754	-0.150442	-0.099138	36.957	30.29	18.841	13.913	11.393	5.298	5.515	11.466	5.806	3.338	1.742	5.515	5.588	2.177	3.338	5.298	10.74	5.588	5.806	11.393
Ophiocomina_nigra	Ophiotomidae	C4	Shallow	Shallow	Shallow	Shallow	Shallow	COX2	57.971	42.029	-0.110345	-0.06	30.725	27.246	23.333	18.696	7.983	6.096	5.733	9.144	5.951	5.007	4.354	5.733	6.749	3.193	5.007	6.096	8.273	6.749	5.951	7.983
Ophiomastix_mixta	Ophiocomidae	C4	Shallow	Shallow	Shallow	Shallow	Shallow	COX2	56.609	43.391	-0.211921	-0.126904	31.897	24.713	26.293	17.098	7.986	6.187	6.331	7.77	6.763	5.612	3.022	6.331	6.619	3.309	5.612	6.187	6.906	6.619	6.763	7.986
Ophiarachnella_gorgonia	Ophiodermatidae	C4	Shallow	Shallow	Shallow	Shallow	Shallow	COX2	59.019	40.981	-0.204225	-0.286064	37.951	21.068	24.675	16.306	9.827	5.997	5.564	8.092	6.503	4.552	3.902	5.564	6.647	3.324	4.552	5.997	6.503	6.647	6.503	9.827
Ophioplocus_incipiens	Hemieuryalidae	C3	Deep	DeepAnt	Deep	DeepAnt	Deep	COX2	57.749	42.251	-0.155709	-0.037975	29.971	27.778	24.415	17.836	7.98	4.685	6.296	9.956	5.49	6.589	2.782	6.296	6.296	3.514	6.589	4.685	9.078	6.296	5.49	7.98
Ophionotus_victoriae	Ophiuridae	C5	Deep	DeepAnt	Deep	DeepAnt	Deep	COX2	62.482	37.518	-0.038462	0.020785	30.592	31.89	19.481	18.038	9.682	5.275	6.142	10.116	6.286	4.624	1.734	6.142	5.853	3.035	4.624	5.275	9.393	5.853	6.286	9.682
Gorgonocephalus_chilensis	Gorgonocephalidae	C6	Deep	DeepAnt	Deep	DeepAnt	Deep	COX2	68.543	31.457	-0.110092	-0.141053	39.105	29.437	17.46	13.997	12.934	4.769	4.986	11.561	5.708	2.89	2.168	4.986	6.069	2.023	2.89	4.769	9.538	6.069	5.708	12.934
Astrohamma_tuberculatum	Gorgonocephalidae	C6	Shallow	DeepAnt	Shallow	DeepAnt	Antartic	COX2	70.996	29.004	-0.024876	-0.134146	40.26	30.736	14.863	14.141	12.717	4.263	5.058	13.439	4.913	2.818	1.734	5.058	5.853	1.59	2.818	4.263	11.994	5.853	4.913	12.717
Astrospartus_mediterraneus	Gorgonocephalidae	C6	Shallow	Shallow	Shallow	Shallow	Shallow	COX2	66.957	33.043	-0.245614	-0.255411	42.029	24.928	20.58	12.464	12.046	5.08	5.588	10.74	6.313	2.758	1.887	5.588	6.967	1.742	2.758	5.08	8.128	6.967	6.313	12.046
Astrotoma_agassizii2	Gorgonocephalidae	C6	Deep	DeepAnt	Deep	DeepAnt	Deep	COX2	68.687	31.313	-0.179724	-0.218487	41.847	26.84	18.47	12.843	11.416	4.697	5.058	13.15	5.636	2.962	2.023	5.058	6.431	1.59	2.962	4.697	10.838	6.431	5.636	11.416
Ophiosteira_antarctica	Ophiopyrgidae	C5	Shallow	DeepAnt	Shallow	DeepAnt	Antartic	COX2	65.224	34.776	-0.103734	-0.044248	34.055	31.169	19.192	15.584	10.694	4.046	5.275	12.572	5.925	4.48	1.734	5.275	5.708	3.179	4.48	4.046	10.26	5.708	5.925	10.694
Ophiosteira_sp	Ophiopyrgidae	C5	Shallow	DeepAnt	Shallow	DeepAnt	Antartic	COX2	66.667	33.333	-0.056277	-0.030303	34.343	32.323	17.605	15.729	11.272	4.48	5.275	12.283	5.636	3.757	2.023	5.275	5.997	2.457	3.757	4.48	10.405	5.997	5.636	11.272
Ophioplinthus_brevirima	Ophiopyrgidae	C5	Deep	DeepAnt	Deep	DeepAnt	Deep	COX2	64.646	35.354	-0.110204	-0.084821	35.065	29.582	19.625	15.729	10.043	4.841	5.708	11.705	6.431	3.974	1.59	5.708	6.431	2.457	3.974	4.841	9.393	6.431	6.431	10.043
Ophioplinthus_gelida	Ophiopyrgidae	C5	Deep	DeepAnt	Deep	DeepAnt	Deep	COX2	62.915	37.085	-0.089494	0.013761	31.025	31.89	20.202	16.883	9.682	5.419	5.925	10.405	6.214	4.48	1.879	5.925	6.214	2.457	4.48	5.419	9.393	6.214	6.214	9.682
Ophioplocus_japonicus	Hemieuryalidae	C3	Shallow	Shallow	Shallow	Shallow	Shallow	COX2	57.287	42.713	-0.222973	-0.24937	35.786	21.501	26.118	16.595	8.382	4.913	6.792	8.526	5.708	5.997	2.89	6.792	5.997	4.48	5.997	4.913	8.526	5.997	5.708	8.382
Ophiura_albida	Ophiuridae	C5	Shallow	Shallow	Shallow	Shallow	Shallow	COX2	65.079	34.921	-0.049587	0.002217	32.468	32.612	18.326	16.595	10.043	5.853	5.925	10.694	6.72	3.251	1.59	5.925	5.925	2.457	3.251	5.853	9.827	5.925	6.72	10.043
Ophiuroglypha_kinbergi	Ophiopyrgidae	C5	Shallow	Shallow	Shallow	Shallow	Shallow	COX2	64.791	35.209	-0.008197	0.011136	32.035	32.756	17.749	17.46	10.477	5.13	5.347	11.416	6.358	3.757	2.168	5.347	6.286	2.457	3.757	5.13	9.249	6.286	6.358	10.477
Ophiura_lutkeni	Ophiuridae	C5	Shallow	Shallow	Shallow	Shallow	Shallow	COX2	63.025	36.975	-0.106061	-0.031111	32.493	30.532	20.448	16.527	10.449	5.68	6.311	9.116	5.891	4.067	2.244	6.311	6.101	2.665	4.067	5.68	8.976	6.101	5.891	10.449
Ophiura_sarsii	Ophiuridae	C5	Shallow	Shallow	Shallow	Shallow	Shallow	COX2	63.348	36.652	-0.062992	0.025057	30.88	32.468	19.481	17.172	10.838	5.13	5.853	9.827	6.142	4.48	1.879	5.853	6.575	2.168	4.48	5.13	8.092	6.575	6.142	10.838
Acanthaster_brevispinus	.	.	OG	OG	OG	OG	OG	COX3	53.129	46.871	-0.297003	0.009615	26.309	26.82	30.396	16.475	6.458	6.586	7.225	6.266	5.946	6.841	3.453	7.225	5.818	4.22	6.841	6.586	8.312	5.818	5.946	6.458
Amphiura_sp	Amphiuridae	C1	Deep	DeepAnt	Seep	Seep	Seep	COX3	58.02	41.98	-0.170149	0.015119	28.571	29.449	24.561	17.419	8.407	5.332	6.462	8.783	6.085	5.082	3.388	6.462	7.089	3.513	5.082	5.332	7.403	7.089	6.085	8.407
Amphiura_sp_JN-2020	Amphiuridae	C1	Deep	DeepAnt	Deep	DeepAnt	Antartic	COX3	57.018	42.982	-0.154519	0.050549	27.068	29.95	24.812	18.17	8.281	5.458	6.964	7.779	5.96	6.085	2.509	6.964	6.085	3.89	6.085	5.458	8.156	6.085	5.96	8.281
Amphioplus_laevis	Amphiuridae	C1	Shallow	Shallow	Shallow	Shallow	Shallow	COX3	55.013	44.987	-0.069638	0.09795	24.812	30.201	24.06	20.927	8.156	5.583	6.713	7.026	5.96	6.838	3.011	6.713	6.336	3.764	6.838	5.583	7.026	6.336	5.96	8.156
Amphipholis_squamata	Amphiuridae	C1	Shallow	Shallow	Shallow	Shallow	Shallow	COX3	61.905	38.095	-0.111842	0.11336	27.444	34.461	21.178	16.917	9.598	4.58	6.211	10.54	6.901	4.454	1.506	6.211	6.148	3.89	4.454	4.58	8.281	6.148	6.901	9.598
Amphiura_digitula2	Amphiuridae	C1	Shallow	Shallow	Shallow	Shallow	Shallow	COX3	56.015	43.985	-0.190883	0.082774	25.689	30.326	26.19	17.794	8.532	5.709	6.713	7.026	5.96	5.96	3.388	6.713	6.964	3.388	5.96	5.709	6.524	6.964	5.96	8.532
Amphiura_sinicola	Amphiuridae	C1	Shallow	Shallow	Shallow	Shallow	Shallow	COX3	61.278	38.722	-0.106796	0.124744	26.817	34.461	21.429	17.293	10.289	5.521	6.148	8.657	6.524	4.58	2.133	6.148	5.646	3.639	4.58	5.521	8.156	5.646	6.524	10.289
Histampica_haimaensis	Ophiothamnidae	C2	Deep	DeepAnt	Seep	Seep	Seep	COX3	58.271	41.729	0.255255	0.337634	19.298	38.972	15.539	26.19	10.602	5.207	4.893	8.407	6.901	5.96	3.137	4.893	5.082	4.642	5.96	5.207	6.524	5.082	6.901	10.602
Ophiopholis_aculeata	Ophiopholidae	C2	Deep	DeepAnt	Deep	DeepAnt	Deep	COX3	60.881	39.119	-0.093248	0	30.44	30.44	21.384	17.736	10.013	5.73	6.36	8.312	6.549	4.534	2.141	6.36	5.668	3.652	4.534	5.73	8.186	5.668	6.549	10.013
Ophiopholis_japonica2	Ophiopholidae	C2	Deep	DeepAnt	Deep	DeepAnt	Deep	COX3	62.907	37.093	-0.013514	0.027888	30.576	32.331	18.797	18.296	10.665	5.27	7.089	8.407	6.462	3.764	1.255	7.089	5.646	3.89	3.764	5.27	8.657	5.646	6.462	10.665
Ophiopholis_mirabilis	Ophiopholidae	C2	Shallow	Shallow	Shallow	Shallow	Shallow	COX3	57.644	42.356	-0.035503	0.056522	27.193	30.451	21.93	20.426	9.912	5.772	6.336	6.775	6.964	5.521	2.384	6.336	5.144	4.768	5.521	5.772	6.775	5.144	6.964	9.912
Ophiophthalmus_sp	Ophiacanthidae	C4	Deep	DeepAnt	Seep	Seep	Seep	COX3	66.92	33.08	-0.065134	0.003788	33.333	33.587	17.617	15.463	11.612	4.569	5.584	11.675	5.33	4.251	1.396	5.584	5.203	2.538	4.251	4.569	11.294	5.203	5.33	11.612
Ophiacantha_linea	Ophiacanthidae	C4	Deep	DeepAnt	Deep	DeepAnt	Deep	COX3	66.667	33.333	-0.064151	0.049057	31.698	34.969	17.736	15.597	12.28	4.723	6.108	10.202	5.479	3.841	1.259	6.108	5.353	2.771	3.841	4.723	10.202	5.353	5.479	12.28
Ophiocomina_nigra	Ophiotomidae	C4	Shallow	Shallow	Shallow	Shallow	Shallow	COX3	54.386	45.614	-0.137363	0.013825	26.817	27.569	25.94	19.674	6.713	5.521	6.524	8.407	6.085	5.96	4.266	6.524	7.215	4.141	5.96	5.521	7.152	7.215	6.085	6.713
Ophiomastix_mixta	Ophiocomidae	C4	Shallow	Shallow	Shallow	Shallow	Shallow	COX3	57.644	42.356	-0.142012	-0.017391	29.323	28.321	24.185	18.17	8.657	5.144	6.838	8.156	6.462	5.521	2.384	6.838	6.524	4.015	5.521	5.144	7.152	6.524	6.462	8.657
Ophiarachnella_gorgonia	Ophiodermatidae	C4	Shallow	Shallow	Shallow	Shallow	Shallow	COX3	58.145	41.855	-0.185629	-0.172414	34.085	24.06	24.812	17.043	8.407	5.521	6.964	8.156	5.834	5.521	2.635	6.964	6.65	3.262	5.521	5.521	8.156	6.65	5.834	8.407
Ophioplocus_incipiens	Hemieuryalidae	C3	Deep	DeepAnt	Deep	DeepAnt	Deep	COX3	55.764	44.236	-0.155807	0.029213	27.068	28.697	25.564	18.672	7.716	4.956	7.277	7.905	6.023	6.085	2.76	7.277	6.211	4.893	6.085	4.956	7.905	6.211	6.023	7.716
Ophionotus_victoriae	Ophiuridae	C5	Deep	DeepAnt	Deep	DeepAnt	Deep	COX3	59.9	40.1	0.0125	0.150628	25.439	34.461	19.799	20.301	9.849	5.332	6.336	8.407	6.211	5.521	2.008	6.336	5.583	3.639	5.521	5.332	8.281	5.583	6.211	9.849
Gorgonocephalus_chilensis	Gorgonocephalidae	C6	Deep	DeepAnt	Deep	DeepAnt	Deep	COX3	67.547	32.453	-0.093023	-0.057728	35.723	31.824	17.736	14.717	12.72	5.164	6.171	9.698	6.045	3.023	1.008	6.171	5.542	2.519	3.023	5.164	9.446	5.542	6.045	12.72
Astrohamma_tuberculatum	Gorgonocephalidae	C6	Shallow	DeepAnt	Shallow	DeepAnt	Antartic	COX3	68.805	31.195	-0.120968	-0.042048	35.849	32.956	17.484	13.711	12.469	4.597	5.982	11.335	5.793	3.086	0.756	5.982	6.045	1.889	3.086	4.597	10.076	6.045	5.793	12.469
Astrospartus_mediterraneus	Gorgonocephalidae	C6	Shallow	Shallow	Shallow	Shallow	Shallow	COX3	65.157	34.843	-0.155235	-0.050193	34.214	30.943	20.126	14.717	12.217	5.479	6.423	8.438	5.668	3.589	1.763	6.423	6.36	2.015	3.589	5.479	8.312	6.36	5.668	12.217
Astrotoma_agassizii2	Gorgonocephalidae	C6	Deep	DeepAnt	Deep	DeepAnt	Deep	COX3	67.044	32.956	-0.091603	-0.050657	35.22	31.824	17.987	14.969	12.343	4.282	5.793	11.083	5.856	3.589	1.259	5.793	6.108	2.519	3.589	4.282	9.194	6.108	5.856	12.343
Ophiosteira_antarctica	Ophiopyrgidae	C5	Shallow	DeepAnt	Shallow	DeepAnt	Antartic	COX3	63.033	36.967	-0.050847	0.073559	29.198	33.835	19.424	17.544	10.916	4.203	6.713	9.661	5.772	5.019	1.004	6.713	6.023	3.262	5.019	4.203	8.783	6.023	5.772	10.916
Ophiosteira_sp	Ophiopyrgidae	C5	Shallow	DeepAnt	Shallow	DeepAnt	Antartic	COX3	62.406	37.594	0.02	0.076305	28.822	33.584	18.421	19.173	10.54	4.203	6.399	10.038	5.897	5.521	1.004	6.399	6.085	3.011	5.521	4.203	8.657	6.085	5.897	10.54
Ophioplinthus_brevirima	Ophiopyrgidae	C5	Deep	DeepAnt	Deep	DeepAnt	Deep	COX3	63.91	36.09	-0.048611	0.05098	30.326	33.584	18.922	17.168	10.351	4.768	7.026	9.787	6.148	4.015	0.878	7.026	5.897	3.388	4.015	4.768	9.536	5.897	6.148	10.351
Ophioplinthus_gelida	Ophiopyrgidae	C5	Deep	DeepAnt	Deep	DeepAnt	Deep	COX3	62.03	37.97	-0.141914	0.220202	24.185	37.845	21.679	16.291	10.54	4.391	6.901	9.159	5.332	4.768	2.008	6.901	6.462	3.388	4.768	4.391	8.657	6.462	5.332	10.54
Ophioplocus_japonicus	Hemieuryalidae	C3	Shallow	Shallow	Shallow	Shallow	Shallow	COX3	58.365	41.635	-0.196375	-0.146552	33.459	24.906	24.906	16.73	8.501	6.171	7.557	6.927	6.486	4.786	2.015	7.557	6.36	3.526	4.786	6.171	7.809	6.36	6.486	8.501
Ophiura_albida	Ophiuridae	C5	Shallow	Shallow	Shallow	Shallow	Shallow	COX3	61.779	38.221	0.022951	0.083164	28.321	33.459	18.672	19.549	9.849	5.646	6.462	8.908	6.65	4.015	2.008	6.462	6.085	3.388	4.015	5.646	8.281	6.085	6.65	9.849
Ophiuroglypha_kinbergi	Ophiopyrgidae	C5	Shallow	Shallow	Shallow	Shallow	Shallow	COX3	62.406	37.594	0.04	0.11245	27.694	34.712	18.045	19.549	10.916	5.27	6.838	8.156	5.583	4.266	2.133	6.838	5.772	3.513	4.266	5.27	8.908	5.772	5.583	10.916
Ophiura_lutkeni	Ophiuridae	C5	Shallow	Shallow	Shallow	Shallow	Shallow	COX3	58.772	41.228	-0.051672	0.066098	27.444	31.328	21.679	19.549	9.41	5.144	6.901	7.905	6.023	5.458	2.258	6.901	6.524	3.513	5.458	5.144	7.403	6.524	6.023	9.41
Ophiura_sarsii	Ophiuridae	C5	Shallow	Shallow	Shallow	Shallow	Shallow	COX3	60.902	39.098	-0.019231	0.111111	27.068	33.835	19.925	19.173	9.724	4.642	6.524	9.536	6.274	4.768	2.008	6.524	6.274	3.89	4.768	4.642	8.156	6.274	6.274	9.724
Acanthaster_brevispinus	.	.	OG	OG	OG	OG	OG	CYTB	56.404	43.596	-0.331992	0.023328	27.544	28.86	29.035	14.561	8.911	4.96	6.98	7.375	5.443	6.629	2.722	6.98	6.716	3.512	6.629	4.96	7.112	6.716	5.443	8.911
Amphiura_sp	Amphiuridae	C1	Deep	DeepAnt	Seep	Seep	Seep	CYTB	62.963	37.037	0.227907	0.316005	21.533	41.43	14.298	22.739	12.802	4.957	4.957	8.793	5.905	4.655	3.017	4.957	4.741	4.138	4.655	4.957	8.017	4.741	5.905	12.802
Amphiura_sp_JN-2020	Amphiuridae	C1	Deep	DeepAnt	Deep	DeepAnt	Antartic	CYTB	62.24	37.76	0.004785	0.227866	24.029	38.211	18.79	18.97	11.573	4.611	6.193	8.77	5.741	5.515	1.447	6.193	5.651	3.074	5.515	4.611	8.137	5.651	5.741	11.573
Amphioplus_laevis	Amphiuridae	C1	Shallow	Shallow	Shallow	Shallow	Shallow	CYTB	63.264	36.736	0.026128	0.266207	23.211	40.052	17.888	18.848	12.314	4.76	6.463	8.122	5.59	5.022	1.31	6.463	5.459	3.144	5.022	4.76	8.21	5.459	5.59	12.314
Amphipholis_squamata	Amphiuridae	C1	Shallow	Shallow	Shallow	Shallow	Shallow	CYTB	67.602	32.398	0.086614	0.220126	26.361	41.241	14.796	17.602	13.362	4.426	5.617	10.383	5.234	3.83	1.532	5.617	4.979	2.979	3.83	4.426	10.213	4.979	5.234	13.362
Amphiura_digitula2	Amphiuridae	C1	Shallow	Shallow	Shallow	Shallow	Shallow	CYTB	67.016	32.984	0.179894	0.304688	23.298	43.717	13.525	19.459	13.1	5.328	5.328	9.782	5.939	3.93	1.31	5.328	4.629	2.62	3.93	5.328	9.782	4.629	5.939	13.1
Amphiura_sinicola	Amphiuridae	C1	Shallow	Shallow	Shallow	Shallow	Shallow	CYTB	66.054	33.946	0.06701	0.260927	24.409	41.645	15.836	18.11	13.398	4.422	5.648	9.545	5.56	4.378	1.401	5.648	5.035	3.152	4.378	4.422	9.019	5.035	5.56	13.398
Histampica_haimaensis	Ophiothamnidae	C2	Deep	DeepAnt	Seep	Seep	Seep	CYTB	63.07	36.93	0.111639	0.301808	22.018	41.053	16.404	20.526	12.994	5.048	4.214	9.306	6.19	5.18	2.809	4.214	4.214	4.039	5.18	5.048	8.165	4.214	6.19	12.994
Ophiopholis_aculeata	Ophiopholidae	C2	Deep	DeepAnt	Deep	DeepAnt	Deep	CYTB	63.874	36.126	0.086957	0.295082	22.513	41.361	16.492	19.634	12.751	4.76	5.459	8.996	5.371	4.629	2.62	5.459	5.284	3.406	4.629	4.76	8.472	5.284	5.371	12.751
Ophiopholis_japonica2	Ophiopholidae	C2	Deep	DeepAnt	Deep	DeepAnt	Deep	CYTB	63.43	36.57	0.110048	0.318621	21.61	41.82	16.273	20.297	12.084	5.56	6.13	7.968	5.867	4.422	1.839	6.13	5.342	2.977	4.422	5.56	8.406	5.342	5.867	12.084
Ophiopholis_mirabilis	Ophiopholidae	C2	Shallow	Shallow	Shallow	Shallow	Shallow	CYTB	60.367	39.633	0.024283	0.284058	21.61	38.758	19.335	20.297	11.471	5.166	6.217	7.356	6.392	4.991	2.189	6.217	5.385	4.291	4.991	5.166	6.918	5.385	6.392	11.471
Ophiophthalmus_sp	Ophiacanthidae	C4	Deep	DeepAnt	Seep	Seep	Seep	CYTB	69.666	30.334	-0.146893	0.072571	32.305	37.361	17.395	12.939	13.25	4.631	5.103	11.835	4.588	3.945	1.544	5.103	4.288	2.316	3.945	4.631	12.693	4.288	4.588	13.25
Ophiacantha_linea	Ophiacanthidae	C4	Deep	DeepAnt	Deep	DeepAnt	Deep	CYTB	67.979	32.021	0.120219	0.320463	23.097	44.882	14.086	17.935	14.842	4.422	4.947	9.807	5.123	4.553	1.313	4.947	4.51	2.539	4.553	4.422	9.545	4.51	5.123	14.842
Ophiocomina_nigra	Ophiotomidae	C4	Shallow	Shallow	Shallow	Shallow	Shallow	CYTB	62.406	37.594	0.075556	0.261044	23.058	39.348	17.377	20.217	11.538	5.477	6.062	8.11	5.769	4.724	2.258	6.062	5.184	3.428	4.724	5.477	8.696	5.184	5.769	11.538
Ophiomastix_mixta	Ophiocomidae	C4	Shallow	Shallow	Shallow	Shallow	Shallow	CYTB	63.78	36.22	0.217391	0.341564	20.997	42.782	14.173	22.047	12.653	5.298	5.648	8.319	6.042	4.685	1.751	5.648	4.947	3.152	4.685	5.298	8.231	4.947	6.042	12.653
Ophiarachnella_gorgonia	Ophiodermatidae	C4	Shallow	Shallow	Shallow	Shallow	Shallow	CYTB	61.867	38.133	0.212815	0.413258	18.15	43.717	15.009	23.124	13.406	5.764	5.502	6.288	6.157	5.677	1.747	5.502	4.716	2.882	5.677	5.764	6.638	4.716	6.157	13.406
Ophioplocus_incipiens	Hemieuryalidae	C3	Deep	DeepAnt	Deep	DeepAnt	Deep	CYTB	63.588	36.412	0.077295	0.325035	21.46	42.128	16.799	19.613	13.204	4.357	5.81	8.451	5.37	5.106	1.937	5.81	4.665	4.049	5.106	4.357	8.539	4.665	5.37	13.204
Ophionotus_victoriae	Ophiuridae	C5	Deep	DeepAnt	Deep	DeepAnt	Deep	CYTB	62.565	37.435	-0.142191	0.124128	27.4	35.166	21.379	16.056	11.485	4.672	6.07	9.083	5.371	5.109	2.183	6.07	5.328	3.581	5.109	4.672	9.083	5.328	5.371	11.485
Gorgonocephalus_chilensis	Gorgonocephalidae	C6	Deep	DeepAnt	Deep	DeepAnt	Deep	CYTB	70.079	29.921	0.116959	0.278402	25.284	44.794	13.211	16.71	14.667	4.203	5.298	10.858	4.466	3.984	1.226	5.298	4.947	1.839	3.984	4.203	10.946	4.947	4.466	14.667
Astrohamma_tuberculatum	Gorgonocephalidae	C6	Shallow	DeepAnt	Shallow	DeepAnt	Antartic	CYTB	72.775	27.225	0.179487	0.278177	26.265	46.51	11.169	16.056	15.764	4.061	4.934	11.616	4.323	3.493	0.873	4.934	4.585	1.485	3.493	4.061	11.703	4.585	4.323	15.764
Astrospartus_mediterraneus	Gorgonocephalidae	C6	Shallow	Shallow	Shallow	Shallow	Shallow	CYTB	70.942	29.058	0.183183	0.281673	25.48	45.462	11.867	17.19	14.672	5.109	5.633	10.044	4.585	3.1	1.223	5.633	4.672	1.659	3.1	5.109	11.528	4.672	4.585	14.672
Astrotoma_agassizii2	Gorgonocephalidae	C6	Deep	DeepAnt	Deep	DeepAnt	Deep	CYTB	71.03	28.97	0.162651	0.260442	26.265	44.764	12.129	16.841	15.328	4.236	5.197	10.742	4.541	3.45	1.31	5.197	4.716	2.096	3.45	4.236	10.917	4.716	4.541	15.328
Ophiosteira_antarctica	Ophiopyrgidae	C5	Shallow	DeepAnt	Shallow	DeepAnt	Antartic	CYTB	68.158	31.842	-0.173554	0.052767	32.281	35.877	18.684	13.158	12.072	3.6	5.751	12.643	4.785	4.17	1.229	5.751	5.882	2.283	4.17	3.6	11.326	5.882	4.785	12.072
Ophiosteira_sp	Ophiopyrgidae	C5	Shallow	DeepAnt	Shallow	DeepAnt	Antartic	CYTB	67.544	32.456	-0.097297	0.064935	31.579	35.965	17.807	14.649	12.291	4.083	5.751	11.677	5.004	4.258	1.229	5.751	5.575	2.283	4.258	4.083	10.887	5.575	5.004	12.291
Ophioplinthus_brevirima	Ophiopyrgidae	C5	Deep	DeepAnt	Deep	DeepAnt	Deep	CYTB	66.842	33.158	-0.179894	-0.007874	33.684	33.158	19.561	13.596	11.677	4.17	5.926	11.677	5.268	4.434	0.966	5.926	5.663	2.283	4.434	4.17	10.799	5.663	5.268	11.677
Ophioplinthus_gelida	Ophiopyrgidae	C5	Deep	DeepAnt	Deep	DeepAnt	Deep	CYTB	64.298	35.702	-0.169533	0.178718	26.404	37.895	20.877	14.825	11.545	4.39	6.058	10.184	4.565	5.224	2.019	6.058	5.224	2.985	5.224	4.39	10.799	5.224	4.565	11.545
Ophioplocus_japonicus	Hemieuryalidae	C3	Shallow	Shallow	Shallow	Shallow	Shallow	CYTB	65.267	34.733	0.219144	0.399464	19.598	45.669	13.561	21.172	13.748	4.641	5.342	8.932	5.604	4.947	1.489	5.342	5.254	2.539	4.947	4.641	7.968	5.254	5.604	13.748
Ophiura_albida	Ophiuridae	C5	Shallow	Shallow	Shallow	Shallow	Shallow	CYTB	62.992	37.008	-0.059102	0.086111	28.784	34.208	19.598	17.41	10.727	4.991	6.961	8.844	4.729	4.641	2.189	6.961	5.779	3.065	4.641	4.991	10.245	5.779	4.729	10.727
Ophiuroglypha_kinbergi	Ophiopyrgidae	C5	Shallow	Shallow	Shallow	Shallow	Shallow	CYTB	63.86	36.14	0.004854	0.173077	26.404	37.456	17.982	18.158	11.765	4.96	6.19	9.043	5.663	4.434	1.756	6.19	5.882	2.809	4.434	4.96	8.604	5.882	5.663	11.765
Ophiura_lutkeni	Ophiuridae	C5	Shallow	Shallow	Shallow	Shallow	Shallow	CYTB	63.43	36.57	-0.129187	0.015172	31.234	32.196	20.647	15.923	11.077	4.816	5.867	9.982	5.254	5.342	1.839	5.867	5.692	2.452	5.342	4.816	9.632	5.692	5.254	11.077
Ophiura_sarsii	Ophiuridae	C5	Shallow	Shallow	Shallow	Shallow	Shallow	CYTB	61.505	38.495	-0.118182	0.11522	27.209	34.296	21.522	16.973	11.033	5.385	6.392	7.968	4.991	5.21	2.627	6.392	5.867	2.802	5.21	5.385	8.844	5.867	4.991	11.033
Acanthaster_brevispinus	.	.	OG	OG	OG	OG	OG	ND1	58.308	41.692	0.310513	0.36014	18.654	39.653	14.373	27.319	11.224	5.612	6.327	6.02	5.408	6.531	2.551	6.327	5	3.673	6.531	5.612	7.551	5	5.408	11.224
Amphiura_sp	Amphiuridae	C1	Deep	DeepAnt	Seep	Seep	Seep	ND1	63.764	36.236	0.359116	0.356358	20.521	43.243	11.612	24.625	13.477	4.409	5.11	8.918	4.91	5.912	2.204	5.11	4.459	3.307	5.912	4.409	9.018	4.459	4.91	13.477
Amphiura_sp_JN-2020	Amphiuridae	C1	Deep	DeepAnt	Deep	DeepAnt	Antartic	ND1	63.573	36.427	0.145205	0.287284	22.655	40.918	15.569	20.858	13.187	3.946	5.994	8.691	4.845	5.894	1.499	5.994	4.246	4.096	5.894	3.946	9.491	4.246	4.845	13.187
Amphioplus_laevis	Amphiuridae	C1	Shallow	Shallow	Shallow	Shallow	Shallow	ND1	62.663	37.337	0.211796	0.348243	20.42	42.242	14.715	22.623	12.926	4.659	6.964	6.814	4.259	5.661	1.804	6.964	5.21	3.106	5.661	4.659	8.918	5.21	4.259	12.926
Amphipholis_squamata	Amphiuridae	C1	Shallow	Shallow	Shallow	Shallow	Shallow	ND1	68.077	31.923	0.242902	0.269231	24.874	43.202	12.085	19.839	13.76	4.385	6.502	9.375	4.335	4.335	0.806	6.502	4.536	2.722	4.335	4.385	11.391	4.536	4.335	13.76
Amphiura_digitula2	Amphiuridae	C1	Shallow	Shallow	Shallow	Shallow	Shallow	ND1	67.267	32.733	0.278287	0.324405	22.723	44.545	11.812	20.921	14.629	5.06	5.361	8.617	4.96	4.359	1.703	5.361	3.908	3.006	4.359	5.06	10.12	3.908	4.96	14.629
Amphiura_sinicola	Amphiuridae	C1	Shallow	Shallow	Shallow	Shallow	Shallow	ND1	64.665	35.335	0.314448	0.278638	23.323	41.341	12.112	23.223	12.926	4.058	6.463	8.918	4.709	4.709	1.804	6.463	4.259	4.609	4.709	4.058	10.421	4.259	4.709	12.926
Histampica_haimaensis	Ophiothamnidae	C2	Deep	DeepAnt	Seep	Seep	Seep	ND1	63.179	36.821	-0.114206	0.11039	28.103	35.077	20.513	16.308	11.294	3.593	5.955	10.78	4.107	5.801	2.567	5.955	4.671	4.312	5.801	3.593	11.499	4.671	4.107	11.294
Ophiopholis_aculeata	Ophiopholidae	C2	Deep	DeepAnt	Deep	DeepAnt	Deep	ND1	62.863	37.137	0.180593	0.404459	18.719	44.144	15.215	21.922	12.475	4.709	6.413	7.816	5.311	5.06	1.804	6.413	5.01	3.808	5.06	4.709	8.617	5.01	5.311	12.475
Ophiopholis_japonica2	Ophiopholidae	C2	Deep	DeepAnt	Deep	DeepAnt	Deep	ND1	62.488	37.512	0.198939	0.43949	17.512	44.975	15.025	22.488	13.795	5.428	5.827	6.175	5.03	5.727	2.191	5.827	4.133	3.486	5.727	5.428	8.267	4.133	5.03	13.795
Ophiopholis_mirabilis	Ophiopholidae	C2	Shallow	Shallow	Shallow	Shallow	Shallow	ND1	62.162	37.838	0.111111	0.355878	20.02	42.142	16.817	21.021	12.926	4.91	6.814	6.413	5.311	4.81	2.004	6.814	5.11	4.108	4.81	4.91	7.715	5.11	5.311	12.926
Ophiophthalmus_sp	Ophiacanthidae	C4	Deep	DeepAnt	Seep	Seep	Seep	ND1	71.313	28.687	-0.077465	0.065156	33.333	37.98	15.455	13.232	14.004	3.236	6.572	11.83	3.387	3.488	0.91	6.572	4.702	2.932	3.488	3.236	13.549	4.702	3.387	14.004
Ophiacantha_linea	Ophiacanthidae	C4	Deep	DeepAnt	Deep	DeepAnt	Deep	ND1	70.122	29.878	0.244898	0.336232	23.272	46.85	11.28	18.598	15.412	4.069	5.646	9.969	3.561	4.222	1.526	5.646	4.273	2.34	4.222	4.069	11.801	4.273	3.561	15.412
Ophiocomina_nigra	Ophiotomidae	C4	Shallow	Shallow	Shallow	Shallow	Shallow	ND1	61.732	38.268	0.252632	0.334421	20.544	41.188	14.3	23.968	11.19	4.738	7.006	7.964	5.242	5.04	1.815	7.006	5.292	4.032	5.04	4.738	9.173	5.292	5.242	11.19
Ophiomastix_mixta	Ophiocomidae	C4	Shallow	Shallow	Shallow	Shallow	Shallow	ND1	64.665	35.335	0.291785	0.421053	18.719	45.946	12.513	22.823	15.13	4.459	5.511	7.214	5.361	5.21	1.603	5.511	4.409	3.607	5.21	4.459	7.415	4.409	5.361	15.13
Ophiarachnella_gorgonia	Ophiodermatidae	C4	Shallow	Shallow	Shallow	Shallow	Shallow	ND1	64.753	35.247	0.291429	0.533437	15.106	49.648	12.487	22.759	15.524	5.141	6.3	5.444	5.04	4.889	1.411	6.3	4.738	2.823	4.889	5.141	7.056	4.738	5.04	15.524
Ophioplocus_incipiens	Hemieuryalidae	C3	Deep	DeepAnt	Deep	DeepAnt	Deep	ND1	63.099	36.901	0.18232	0.399031	18.96	44.139	15.087	21.814	13.469	3.673	6.735	7.653	4.643	5.306	1.735	6.735	5.102	4.388	5.306	3.673	8.367	5.102	4.643	13.469
Ophionotus_victoriae	Ophiuridae	C5	Deep	DeepAnt	Deep	DeepAnt	Deep	ND1	66.271	33.729	-0.108504	0.155224	27.992	38.279	18.694	15.035	12.327	3.812	6.98	10	4.505	3.614	1.782	6.98	6.089	3.366	3.614	3.812	10.198	6.089	4.505	12.327
Gorgonocephalus_chilensis	Gorgonocephalidae	C6	Deep	DeepAnt	Deep	DeepAnt	Deep	ND1	72.691	27.309	0.198529	0.325967	24.498	48.193	10.944	16.365	16.633	3.92	5.829	9.95	3.719	3.166	0.905	5.829	4.874	1.709	3.166	3.92	11.156	4.874	3.719	16.633
Astrohamma_tuberculatum	Gorgonocephalidae	C6	Shallow	DeepAnt	Shallow	DeepAnt	Antartic	ND1	73.394	26.606	0.25283	0.406293	21.787	51.606	9.94	16.667	17.487	3.819	5.578	9.849	3.668	3.367	0.704	5.578	4.975	1.106	3.367	3.819	10.553	4.975	3.668	17.487
Astrospartus_mediterraneus	Gorgonocephalidae	C6	Shallow	Shallow	Shallow	Shallow	Shallow	ND1	71.601	28.399	0.347518	0.409283	21.148	50.453	9.265	19.134	17.137	4.889	5.292	8.468	4.637	3.175	1.109	5.292	4.94	1.21	3.175	4.889	9.073	4.94	4.637	17.137
Astrotoma_agassizii2	Gorgonocephalidae	C6	Deep	DeepAnt	Deep	DeepAnt	Deep	ND1	71.988	28.012	0.25448	0.380753	22.289	49.699	10.442	17.57	17.136	3.869	5.628	9.347	3.869	3.518	1.005	5.628	4.925	1.709	3.518	3.869	10.05	4.925	3.869	17.136
Ophiosteira_antarctica	Ophiopyrgidae	C5	Shallow	DeepAnt	Shallow	DeepAnt	Antartic	ND1	68.068	31.932	-0.210031	0.052941	32.232	35.836	19.319	12.613	12.976	3.257	6.162	11.623	3.958	4.659	1.202	6.162	5.261	2.806	4.659	3.257	11.824	5.261	3.958	12.976
Ophiosteira_sp	Ophiopyrgidae	C5	Shallow	DeepAnt	Shallow	DeepAnt	Antartic	ND1	68.268	31.732	-0.179811	0.064516	31.932	36.336	18.719	13.013	13.176	3.507	5.912	11.523	4.058	4.409	1.503	5.912	5.06	2.906	4.409	3.507	11.824	5.06	4.058	13.176
Ophioplinthus_brevirima	Ophiopyrgidae	C5	Deep	DeepAnt	Deep	DeepAnt	Deep	ND1	69.177	30.823	-0.224756	0.024673	33.735	35.442	18.876	11.948	13.518	3.367	6.633	11.055	4.121	3.769	0.905	6.633	5.578	2.714	3.769	3.367	11.357	5.578	4.121	13.518
Ophioplinthus_gelida	Ophiopyrgidae	C5	Deep	DeepAnt	Deep	DeepAnt	Deep	ND1	62.487	37.513	-0.228261	0.171289	25.892	36.595	23.038	14.475	11.531	4.439	7.245	8.061	4.133	6.02	1.327	7.245	5.51	2.755	6.02	4.439	10.102	5.51	4.133	11.531
Ophioplocus_japonicus	Hemieuryalidae	C3	Shallow	Shallow	Shallow	Shallow	Shallow	ND1	62.886	37.114	0.367292	0.531646	14.726	48.159	11.741	25.373	14.592	5.179	6.076	5.578	5.528	5.478	1.494	6.076	4.93	2.988	5.478	5.179	6.375	4.93	5.528	14.592
Ophiura_albida	Ophiuridae	C5	Shallow	Shallow	Shallow	Shallow	Shallow	ND1	65.968	34.032	-0.032258	0.09531	29.84	36.128	17.565	16.467	12.687	4.296	5.994	9.99	4.246	4.496	2.298	5.994	5.045	3.197	4.496	4.296	10.989	5.045	4.246	12.687
Ophiuroglypha_kinbergi	Ophiopyrgidae	C5	Shallow	Shallow	Shallow	Shallow	Shallow	ND1	67.671	32.329	0.006211	0.186944	27.51	40.161	16.064	16.265	12.965	4.171	6.533	10.151	4.221	3.518	1.91	6.533	5.377	3.116	3.518	4.171	11.256	5.377	4.221	12.965
Ophiura_lutkeni	Ophiuridae	C5	Shallow	Shallow	Shallow	Shallow	Shallow	ND1	66.068	33.932	-0.094118	0.135952	28.543	37.525	18.563	15.369	12.188	4.096	6.943	9.79	4.246	4.096	1.698	6.943	5.395	3.397	4.096	4.096	11.189	5.395	4.246	12.188
Ophiura_sarsii	Ophiuridae	C5	Shallow	Shallow	Shallow	Shallow	Shallow	ND1	64.571	35.429	-0.132394	0.156105	27.246	37.325	20.06	15.369	12.987	4.096	6.993	8.192	3.896	4.645	2.198	6.993	5.694	3.297	4.645	4.096	9.69	5.694	3.896	12.987
Acanthaster_brevispinus	.	.	OG	OG	OG	OG	OG	ND2	55.399	44.601	0.313684	0.437288	15.587	39.812	15.305	29.296	10.009	6.344	6.485	4.887	7.096	6.767	1.974	6.485	5.31	3.853	6.767	6.344	5.263	5.31	7.096	10.009
Amphiura_sp	Amphiuridae	C1	Deep	DeepAnt	Seep	Seep	Seep	ND2	67.517	32.483	0.430233	0.353846	21.813	45.703	9.254	23.229	14.461	5.34	5.198	8.79	5.34	4.395	1.323	5.198	4.112	2.363	4.395	5.34	9.83	4.112	5.34	14.461
Amphiura_sp_JN-2020	Amphiuridae	C1	Deep	DeepAnt	Deep	DeepAnt	Antartic	ND2	63.798	36.202	0.240437	0.255814	23.739	40.059	13.749	22.453	11.733	5.099	6.881	8.218	4.653	5.297	1.287	6.881	4.505	3.168	5.297	5.099	10.99	4.505	4.653	11.733
Amphioplus_laevis	Amphiuridae	C1	Shallow	Shallow	Shallow	Shallow	Shallow	ND2	66.859	33.141	0.246377	0.270115	24.4	42.459	12.488	20.653	14.231	4.471	6.01	8.75	3.942	5.481	1.154	6.01	4.279	2.308	5.481	4.471	10.962	4.279	3.942	14.231
Amphipholis_squamata	Amphiuridae	C1	Shallow	Shallow	Shallow	Shallow	Shallow	ND2	73.391	26.609	0.256318	0.185864	29.875	43.516	9.894	16.715	14.808	3.942	6.298	11.635	3.269	2.885	0.865	6.298	4.183	2.308	2.885	3.942	14.423	4.183	3.269	14.808
Amphiura_digitula2	Amphiuridae	C1	Shallow	Shallow	Shallow	Shallow	Shallow	ND2	68.481	31.519	0.436364	0.232915	26.266	42.216	8.883	22.636	13.862	5.593	4.924	9.847	5.258	4.446	1.147	4.924	3.728	2.008	4.446	5.593	11.377	3.728	5.258	13.862
Amphiura_sinicola	Amphiuridae	C1	Shallow	Shallow	Shallow	Shallow	Shallow	ND2	70.03	29.97	0.412541	0.262712	25.816	44.214	8.803	21.167	14.851	4.901	5.545	9.703	4.356	4.307	0.792	5.545	4.01	1.782	4.307	4.901	11.782	4.01	4.356	14.851
Histampica_haimaensis	Ophiothamnidae	C2	Deep	DeepAnt	Seep	Seep	Seep	ND2	64.74	35.26	0.278689	0.264881	23.796	40.944	12.717	22.543	12.97	4.484	5.111	9.836	5.497	5.786	1.254	5.111	3.954	3.375	5.786	4.484	9.932	3.954	5.497	12.97
Ophiopholis_aculeata	Ophiopholidae	C2	Deep	DeepAnt	Deep	DeepAnt	Deep	ND2	67.989	32.011	0.268437	0.375	21.246	46.742	11.709	20.302	14.461	5.246	6.285	8.034	4.631	4.064	1.04	6.285	4.679	1.985	4.064	5.246	10.208	4.679	4.631	14.461
Ophiopholis_japonica2	Ophiopholidae	C2	Deep	DeepAnt	Deep	DeepAnt	Deep	ND2	67.529	32.471	0.233038	0.341844	22.222	45.307	12.452	20.019	14.286	4.986	6.663	7.862	4.602	4.027	0.959	6.663	4.41	2.78	4.027	4.986	10.451	4.41	4.602	14.286
Ophiopholis_mirabilis	Ophiopholidae	C2	Shallow	Shallow	Shallow	Shallow	Shallow	ND2	66.092	33.908	0.20904	0.353623	21.36	44.732	13.41	20.498	13.95	5.561	6.52	6.999	4.842	4.075	1.534	6.52	4.458	2.876	4.075	5.561	9.779	4.458	4.842	13.95
Ophiophthalmus_sp	Ophiacanthidae	C4	Deep	DeepAnt	Seep	Seep	Seep	ND2	79.906	20.094	-0.11215	-0.001175	40	39.906	11.174	8.92	15.836	3.055	4.041	17.011	3.242	2.115	0.658	4.041	3.665	1.222	2.115	3.055	17.199	3.665	3.242	15.836
Ophiacantha_linea	Ophiacanthidae	C4	Deep	DeepAnt	Deep	DeepAnt	Deep	ND2	72.3	27.7	0.437288	0.272727	26.291	46.009	7.793	19.906	15.977	4.699	5.028	10.432	3.994	3.712	1.128	5.028	3.477	1.974	3.712	4.699	12.688	3.477	3.994	15.977
Ophiocomina_nigra	Ophiotomidae	C4	Shallow	Shallow	Shallow	Shallow	Shallow	ND2	63.41	36.59	0.303665	0.287009	22.605	40.805	12.739	23.851	12.033	5.081	6.759	7.862	4.075	5.753	1.726	6.759	4.458	2.972	5.753	5.081	11.122	4.458	4.075	12.033
Ophiomastix_mixta	Ophiocomidae	C4	Shallow	Shallow	Shallow	Shallow	Shallow	ND2	67.243	32.757	0.378299	0.388571	20.557	46.686	10.183	22.574	14.615	6.058	5.048	7.885	6.154	3.942	1.25	5.048	3.99	2.404	3.942	6.058	8.846	3.99	6.154	14.615
Ophiarachnella_gorgonia	Ophiodermatidae	C4	Shallow	Shallow	Shallow	Shallow	Shallow	ND2	67.148	32.852	0.507331	0.53802	15.511	51.638	8.092	24.759	16.152	7.04	4.388	5.979	6.123	4.87	1.061	4.388	3.857	0.675	4.87	7.04	7.425	3.857	6.123	16.152
Ophioplocus_incipiens	Hemieuryalidae	C3	Deep	DeepAnt	Deep	DeepAnt	Deep	ND2	64.583	35.417	0.363636	0.378299	20.076	44.508	11.269	24.148	13.223	5.071	6.398	7.583	4.597	5.498	1.232	6.398	4.408	2.749	5.498	5.071	10.047	4.408	4.597	13.223
Ophionotus_victoriae	Ophiuridae	C5	Deep	DeepAnt	Deep	DeepAnt	Deep	ND2	69.886	30.114	-0.09434	0.105691	31.25	38.636	16.477	13.636	13.412	4.313	6.019	11.185	5.261	2.938	0.853	6.019	5.735	2.085	2.938	4.313	10.521	5.735	5.261	13.412
Gorgonocephalus_chilensis	Gorgonocephalidae	C6	Deep	DeepAnt	Deep	DeepAnt	Deep	ND2	76.487	23.513	0.349398	0.301235	26.723	49.764	7.649	15.864	19.282	4.064	4.679	10.208	3.497	2.836	0.756	4.679	3.828	1.04	2.836	4.064	11.626	3.828	3.497	19.282
Astrohamma_tuberculatum	Gorgonocephalidae	C6	Shallow	DeepAnt	Shallow	DeepAnt	Antartic	ND2	78.659	21.341	0.415929	0.342137	25.873	52.786	6.232	15.109	18.715	3.781	4.915	11.909	3.214	2.174	0.378	4.915	4.159	0.567	2.174	3.781	13.233	4.159	3.214	18.715
Astrospartus_mediterraneus	Gorgonocephalidae	C6	Shallow	Shallow	Shallow	Shallow	Shallow	ND2	75.023	24.977	0.37594	0.319149	25.54	49.484	7.793	17.183	17.904	4.229	4.84	10.526	4.746	2.444	0.47	4.84	4.793	1.034	2.444	4.229	10.056	4.793	4.746	17.904
Astrotoma_agassizii2	Gorgonocephalidae	C6	Deep	DeepAnt	Deep	DeepAnt	Deep	ND2	76.733	23.267	0.387755	0.321782	26.021	50.712	7.123	16.144	18.251	4.183	4.8	11.122	3.85	2.614	0.38	4.8	4.087	0.76	2.614	4.183	12.167	4.087	3.85	18.251
Ophiosteira_antarctica	Ophiopyrgidae	C5	Shallow	DeepAnt	Shallow	DeepAnt	Antartic	ND2	73.219	26.781	-0.219858	0.027237	35.613	37.607	16.334	10.446	13.926	2.567	6.179	13.973	3.517	3.042	0.665	6.179	5.846	1.901	3.042	2.567	13.308	5.846	3.517	13.926
Ophiosteira_sp	Ophiopyrgidae	C5	Shallow	DeepAnt	Shallow	DeepAnt	Antartic	ND2	73.409	26.591	-0.078571	0.040103	35.233	38.177	14.34	12.251	14.306	2.852	5.798	13.783	3.66	3.279	0.57	5.798	5.703	1.426	3.279	2.852	13.023	5.703	3.66	14.306
Ophioplinthus_brevirima	Ophiopyrgidae	C5	Deep	DeepAnt	Deep	DeepAnt	Deep	ND2	72	28	-0.183673	-0.044974	37.619	34.381	16.571	11.429	13.155	2.908	5.672	14.299	4.337	3.622	0.381	5.672	5.529	1.907	3.622	2.908	12.965	5.529	4.337	13.155
Ophioplinthus_gelida	Ophiopyrgidae	C5	Deep	DeepAnt	Deep	DeepAnt	Deep	ND2	68.577	31.423	-0.094225	0.194986	27.603	40.974	17.192	14.231	12.715	4.541	6.453	10.612	4.111	4.207	0.956	6.453	4.35	2.581	4.207	4.541	13.098	4.35	4.111	12.715
Ophioplocus_japonicus	Hemieuryalidae	C3	Shallow	Shallow	Shallow	Shallow	Shallow	ND2	66.478	33.522	0.55618	0.526912	15.725	50.753	7.439	26.083	15.787	6.362	5.184	5.938	5.561	4.807	1.225	5.184	4.241	1.32	4.807	6.362	7.634	4.241	5.561	15.787
Ophiura_albida	Ophiuridae	C5	Shallow	Shallow	Shallow	Shallow	Shallow	ND2	73.295	26.705	0.042553	0.033592	35.417	37.879	12.784	13.92	14.645	3.602	5.545	12.891	3.981	2.891	0.948	5.545	5.213	1.611	2.891	3.602	12.796	5.213	3.981	14.645
Ophiuroglypha_kinbergi	Ophiopyrgidae	C5	Shallow	Shallow	Shallow	Shallow	Shallow	ND2	67.708	32.292	0.038123	0.174825	27.936	39.773	15.53	16.761	12.938	4.218	6.682	10.047	4.265	3.791	1.422	6.682	6.209	1.896	3.791	4.218	10.427	6.209	4.265	12.938
Ophiura_lutkeni	Ophiuridae	C5	Shallow	Shallow	Shallow	Shallow	Shallow	ND2	68.182	31.818	-0.065476	0.030556	33.049	35.133	16.951	14.867	12.891	3.697	6.114	11.374	4.645	3.744	1.422	6.114	5.735	2.749	3.744	3.697	10.806	5.735	4.645	12.891
Ophiura_sarsii	Ophiuridae	C5	Shallow	Shallow	Shallow	Shallow	Shallow	ND2	67.14	32.86	-0.008646	0.086037	30.682	36.458	16.572	16.288	13.128	4.265	6.398	9.763	4.36	3.791	1.896	6.398	5.735	2.654	3.791	4.265	10.332	5.735	4.36	13.128
Acanthaster_brevispinus	.	.	OG	OG	OG	OG	OG	ND3	54.701	45.299	-0.320755	0.020833	26.781	27.92	29.915	15.385	8.571	4.857	6.143	7.714	5.429	7.429	3.714	6.143	6.429	4	7.429	4.857	6.857	6.429	5.429	8.571
Amphiura_sp	Amphiuridae	C1	Deep	DeepAnt	Seep	Seep	Seep	ND3	60.833	39.167	-0.404255	0.013699	30	30.833	27.5	11.667	10.446	3.76	7.521	8.635	4.318	5.85	1.95	7.521	6.685	3.343	5.85	3.76	8.914	6.685	4.318	10.446
Amphiura_sp_JN-2020	Amphiuridae	C1	Deep	DeepAnt	Deep	DeepAnt	Antartic	ND3	62.5	37.5	-0.377778	0.146667	26.667	35.833	25.833	11.667	11.56	2.368	7.521	9.749	2.925	6.407	1.95	7.521	6.407	3.621	6.407	2.368	10.306	6.407	2.925	11.56
Amphioplus_laevis	Amphiuridae	C1	Shallow	Shallow	Shallow	Shallow	Shallow	ND3	63.611	36.389	-0.282443	0.20524	25.278	38.333	23.333	13.056	11.838	2.786	7.103	10.028	3.482	5.989	1.671	7.103	7.242	2.228	5.989	2.786	9.192	7.242	3.482	11.838
Amphipholis_squamata	Amphiuridae	C1	Shallow	Shallow	Shallow	Shallow	Shallow	ND3	69.444	30.556	-0.218182	0.176	28.611	40.833	18.611	11.944	12.396	2.786	7.521	11.978	3.343	3.064	1.393	7.521	7.521	1.95	3.064	2.786	11.421	7.521	3.343	12.396
Amphiura_digitula2	Amphiuridae	C1	Shallow	Shallow	Shallow	Shallow	Shallow	ND3	58.889	41.111	-0.310811	0.160377	24.722	34.167	26.944	14.167	8.357	4.178	8.496	8.357	3.621	5.989	2.507	8.496	6.267	4.178	5.989	4.178	11.142	6.267	3.621	8.357
Amphiura_sinicola	Amphiuridae	C1	Shallow	Shallow	Shallow	Shallow	Shallow	ND3	65.556	34.444	-0.274194	0.135593	28.333	37.222	21.944	12.5	12.117	3.203	7.103	10.306	3.343	5.153	1.671	7.103	6.128	2.786	5.153	3.203	11.142	6.128	3.343	12.117
Histampica_haimaensis	Ophiothamnidae	C2	Deep	DeepAnt	Seep	Seep	Seep	ND3	62.029	37.971	0.282443	0.401869	18.551	43.478	13.623	24.348	13.953	3.634	4.942	8.43	5.233	6.831	2.035	4.942	4.215	4.36	6.831	3.634	7.558	4.215	5.233	13.953
Ophiopholis_aculeata	Ophiopholidae	C2	Deep	DeepAnt	Deep	DeepAnt	Deep	ND3	69.275	30.725	-0.132075	0.079498	31.884	37.391	17.391	13.333	12.645	3.634	6.395	11.919	3.634	3.343	2.035	6.395	5.814	2.616	3.343	3.634	12.5	5.814	3.634	12.645
Ophiopholis_japonica2	Ophiopholidae	C2	Deep	DeepAnt	Deep	DeepAnt	Deep	ND3	68.421	31.579	-0.111111	0.08547	31.287	37.135	17.544	14.035	12.757	4.252	6.891	10.264	3.372	3.812	1.76	6.891	6.012	1.76	3.812	4.252	12.023	6.012	3.372	12.757
Ophiopholis_mirabilis	Ophiopholidae	C2	Shallow	Shallow	Shallow	Shallow	Shallow	ND3	65.797	34.203	-0.067797	0.057269	31.014	34.783	18.261	15.942	12.791	5.087	5.959	9.012	4.942	4.215	2.035	5.959	5.523	2.326	4.215	5.087	9.593	5.523	4.942	12.791
Ophiophthalmus_sp	Ophiacanthidae	C4	Deep	DeepAnt	Seep	Seep	Seep	ND3	74.644	25.356	-0.280899	0.091603	33.903	40.741	16.239	9.117	15.286	2.143	5	14.857	3.429	3.714	0.571	5	5.143	1.714	3.714	2.143	13.429	5.143	3.429	15.286
Ophiacantha_linea	Ophiacanthidae	C4	Deep	DeepAnt	Deep	DeepAnt	Deep	ND3	68.056	31.944	-0.2	0.061224	31.944	36.111	19.167	12.778	12.674	3.621	5.71	11.978	4.457	5.014	0.836	5.71	4.875	2.507	5.014	3.621	11.978	4.875	4.457	12.674
Ophiocomina_nigra	Ophiotomidae	C4	Shallow	Shallow	Shallow	Shallow	Shallow	ND3	57.062	42.938	-0.381579	0.039604	27.401	29.661	29.661	13.277	8.357	4.674	6.657	8.782	5.382	6.657	2.833	6.657	7.365	2.833	6.657	4.674	7.365	7.365	5.382	8.357
Ophiomastix_mixta	Ophiocomidae	C4	Shallow	Shallow	Shallow	Shallow	Shallow	ND3	59.195	40.805	-0.380282	-0.029126	30.46	28.736	28.161	12.644	8.646	5.187	7.061	8.646	5.043	6.628	1.729	7.061	5.764	2.882	6.628	5.187	10.086	5.764	5.043	8.646
Ophiarachnella_gorgonia	Ophiodermatidae	C4	Shallow	Shallow	Shallow	Shallow	Shallow	ND3	62.712	37.288	-0.348485	-0.189189	37.288	25.424	25.141	12.147	10.198	4.249	7.224	9.632	4.249	5.241	1.983	7.224	6.374	2.833	5.241	4.249	10.482	6.374	4.249	10.198
Ophioplocus_incipiens	Hemieuryalidae	C3	Deep	DeepAnt	Deep	DeepAnt	Deep	ND3	62.745	37.255	-0.293233	0.035714	30.252	32.493	24.09	13.165	11.376	2.528	8.006	9.551	2.949	6.039	1.685	8.006	6.882	3.09	6.039	2.528	10.112	6.882	2.949	11.376
Ophionotus_victoriae	Ophiuridae	C5	Deep	DeepAnt	Deep	DeepAnt	Deep	ND3	65.537	34.463	-0.180328	0.224138	25.424	40.113	20.339	14.124	12.606	4.108	6.091	9.915	5.382	4.958	0.85	6.091	5.666	2.55	4.958	4.108	9.065	5.666	5.382	12.606
Gorgonocephalus_chilensis	Gorgonocephalidae	C6	Deep	DeepAnt	Deep	DeepAnt	Deep	ND3	70.621	29.379	-0.384615	0.064	33.051	37.571	20.339	9.04	15.722	3.116	5.949	10.482	3.258	4.391	1.133	5.949	5.524	1.7	4.391	3.116	10.765	5.524	3.258	15.722
Astrohamma_tuberculatum	Gorgonocephalidae	C6	Shallow	DeepAnt	Shallow	DeepAnt	Antartic	ND3	71.751	28.249	-0.28	0.07874	33.051	38.701	18.079	10.169	15.864	3.824	6.516	9.632	3.399	3.399	0.85	6.516	5.524	1.416	3.399	3.824	11.048	5.524	3.399	15.864
Astrospartus_mediterraneus	Gorgonocephalidae	C6	Shallow	Shallow	Shallow	Shallow	Shallow	ND3	72.316	27.684	-0.285714	-0.039062	37.571	34.746	17.797	9.887	14.306	3.258	5.524	13.031	3.683	3.541	1.133	5.524	5.099	1.983	3.541	3.258	13.031	5.099	3.683	14.306
Astrotoma_agassizii2	Gorgonocephalidae	C6	Deep	DeepAnt	Deep	DeepAnt	Deep	ND3	70.621	29.379	-0.269231	0.064	33.051	37.571	18.644	10.734	15.581	4.108	5.666	9.915	4.108	4.108	0.85	5.666	5.666	0.85	4.108	4.108	9.915	5.666	4.108	15.581
Ophiosteira_antarctica	Ophiopyrgidae	C5	Shallow	DeepAnt	Shallow	DeepAnt	Antartic	ND3	65.819	34.181	-0.22314	0.150215	27.966	37.853	20.904	13.277	12.04	3.399	7.224	10.198	3.399	5.382	1.133	7.224	5.807	2.55	5.382	3.399	11.615	5.807	3.399	12.04
Ophiosteira_sp	Ophiopyrgidae	C5	Shallow	DeepAnt	Shallow	DeepAnt	Antartic	ND3	69.492	30.508	-0.222222	0.138211	29.944	39.548	18.644	11.864	13.031	3.399	5.241	13.031	3.966	5.241	0.85	5.241	5.524	1.133	5.241	3.399	12.181	5.524	3.966	13.031
Ophioplinthus_brevirima	Ophiopyrgidae	C5	Deep	DeepAnt	Deep	DeepAnt	Deep	ND3	69.774	30.226	-0.364486	0.08502	31.921	37.853	20.621	9.605	13.598	4.249	5.666	11.331	4.108	4.249	1.133	5.666	5.807	0.85	4.249	4.249	11.331	5.807	4.108	13.598
Ophioplinthus_gelida	Ophiopyrgidae	C5	Deep	DeepAnt	Deep	DeepAnt	Deep	ND3	64.672	35.328	-0.354839	0.259912	23.932	40.741	23.932	11.396	11.714	3.571	7.857	9.143	3.429	5.571	0.857	7.857	6.286	2.286	5.571	3.571	10.857	6.286	3.429	11.714
Ophioplocus_japonicus	Hemieuryalidae	C3	Shallow	Shallow	Shallow	Shallow	Shallow	ND3	62.712	37.288	-0.484848	-0.153153	36.158	26.554	27.684	9.605	10.198	4.249	6.374	10.482	4.391	6.516	1.416	6.374	6.232	1.7	6.516	4.249	10.482	6.232	4.391	10.198
Ophiura_albida	Ophiuridae	C5	Shallow	Shallow	Shallow	Shallow	Shallow	ND3	72.034	27.966	-0.191919	0.066667	33.616	38.418	16.667	11.299	14.731	4.249	5.949	11.048	3.541	3.116	1.416	5.949	4.958	1.7	3.116	4.249	12.748	4.958	3.541	14.731
Ophiuroglypha_kinbergi	Ophiopyrgidae	C5	Shallow	Shallow	Shallow	Shallow	Shallow	ND3	71.751	28.249	-0.1	0.149606	30.508	41.243	15.537	12.712	14.731	4.249	6.657	10.198	3.541	2.55	1.416	6.657	5.949	1.416	2.55	4.249	11.615	5.949	3.541	14.731
Ophiura_lutkeni	Ophiuridae	C5	Shallow	Shallow	Shallow	Shallow	Shallow	ND3	67.514	32.486	-0.286957	0.121339	29.661	37.853	20.904	11.582	14.023	3.966	4.674	11.048	5.524	4.674	1.416	4.674	5.949	1.7	4.674	3.966	8.215	5.949	5.524	14.023
Ophiura_sarsii	Ophiuridae	C5	Shallow	Shallow	Shallow	Shallow	Shallow	ND3	65.254	34.746	-0.252033	0.116883	28.814	36.441	21.751	12.994	13.173	4.674	5.949	8.782	4.958	4.249	2.266	5.949	5.666	2.833	4.249	4.674	8.782	5.666	4.958	13.173
Acanthaster_brevispinus	.	.	OG	OG	OG	OG	OG	ND4	56.327	43.673	-0.433775	-0.044929	29.429	26.898	31.309	12.364	7.923	5.174	6.766	8.321	5.427	7.2	2.46	6.766	5.318	4.124	7.2	5.174	9.479	5.318	5.427	7.923
Amphiura_sp	Amphiuridae	C1	Deep	DeepAnt	Seep	Seep	Seep	ND4	62.178	37.822	-0.377432	-0.069822	33.26	28.918	26.049	11.773	10.383	4.161	7.143	9.426	4.381	5.486	1.915	7.143	6.001	3.24	5.486	4.161	10.309	6.001	4.381	10.383
Amphiura_sp_JN-2020	Amphiuridae	C1	Deep	DeepAnt	Deep	DeepAnt	Antartic	ND4	61.295	38.705	-0.273764	-0.034814	31.714	29.581	24.65	14.054	10.199	4.934	7.327	8.174	4.713	5.854	1.473	7.327	5.339	3.24	5.854	4.934	10.383	5.339	4.713	10.199
Amphioplus_laevis	Amphiuridae	C1	Shallow	Shallow	Shallow	Shallow	Shallow	ND4	62.138	37.862	-0.266667	0.027479	30.215	31.923	23.979	13.883	11.218	4.718	7.318	7.801	4.606	5.386	1.634	7.318	6.241	2.6	5.386	4.718	8.99	6.241	4.606	11.218
Amphipholis_squamata	Amphiuridae	C1	Shallow	Shallow	Shallow	Shallow	Shallow	ND4	68.374	31.626	-0.253521	0.005429	34.001	34.373	19.822	11.804	12.221	3.492	6.575	11.887	4.421	3.789	1.04	6.575	6.092	2.452	3.789	3.492	11.441	6.092	4.421	12.221
Amphiura_digitula2	Amphiuridae	C1	Shallow	Shallow	Shallow	Shallow	Shallow	ND4	61.001	38.999	-0.362264	0.018094	29.948	31.052	26.564	12.436	10.383	4.271	7.143	8.689	4.492	5.965	1.915	7.143	6.186	3.093	5.965	4.271	9.426	6.186	4.492	10.383
Amphiura_sinicola	Amphiuridae	C1	Shallow	Shallow	Shallow	Shallow	Shallow	ND4	65.71	34.29	-0.304721	0.052632	31.126	34.584	22.369	11.921	12.334	4.381	6.627	9.499	4.455	4.455	1.62	6.627	5.67	2.651	4.455	4.381	10.383	5.67	4.455	12.334
Histampica_haimaensis	Ophiothamnidae	C2	Deep	DeepAnt	Seep	Seep	Seep	ND4	63.562	36.438	0.208925	0.302326	22.173	41.39	14.412	22.025	13.757	4.993	4.697	8.358	5.769	5.547	2.219	4.697	4.179	3.476	5.547	4.993	8.062	4.179	5.769	13.757
Ophiopholis_aculeata	Ophiopholidae	C2	Deep	DeepAnt	Deep	DeepAnt	Deep	ND4	62.693	37.307	-0.187377	-0.004695	31.494	31.199	22.149	15.158	10.862	5.007	6.775	8.689	5.081	4.676	2.135	6.775	5.67	3.314	4.676	5.007	9.72	5.67	5.081	10.862
Ophiopholis_japonica2	Ophiopholidae	C2	Deep	DeepAnt	Deep	DeepAnt	Deep	ND4	62.399	37.601	-0.170254	-0.033019	32.23	30.169	22.001	15.6	11.156	4.529	6.811	8.689	5.118	5.118	1.767	6.811	5.339	3.829	5.118	4.529	9.573	5.339	5.118	11.156
Ophiopholis_mirabilis	Ophiopholidae	C2	Shallow	Shallow	Shallow	Shallow	Shallow	ND4	60.633	39.367	-0.117757	0.009709	30.022	30.611	22.001	17.366	11.009	4.713	6.959	7.658	5.449	5.007	2.283	6.959	5.081	4.86	5.007	4.713	8.763	5.081	5.449	11.009
Ophiophthalmus_sp	Ophiacanthidae	C4	Deep	DeepAnt	Seep	Seep	Seep	ND4	72.003	27.997	-0.237598	0.013198	35.526	36.477	17.325	10.673	13.862	3.621	5.486	13.021	3.914	3.292	1.317	5.486	4.243	2.853	3.292	3.621	13.972	4.243	3.914	13.862
Ophiacantha_linea	Ophiacanthidae	C4	Deep	DeepAnt	Deep	DeepAnt	Deep	ND4	69.225	30.775	-0.206651	0.001056	34.576	34.649	18.567	12.208	13.606	3.584	6.218	11.192	4.097	3.767	1.317	6.218	4.828	3.219	3.767	3.584	12.07	4.828	4.097	13.606
Ophiocomina_nigra	Ophiotomidae	C4	Shallow	Shallow	Shallow	Shallow	Shallow	ND4	58.716	41.284	-0.212014	-0.03354	30.343	28.373	25.018	16.265	8.832	4.599	7.993	7.956	4.964	5	2.701	7.993	6.131	4.891	5	4.599	9.416	6.131	4.964	8.832
Ophiomastix_mixta	Ophiocomidae	C4	Shallow	Shallow	Shallow	Shallow	Shallow	ND4	60.866	39.134	-0.395872	-0.092883	33.26	27.606	27.313	11.821	10.507	4.372	7.017	8.523	4.849	5.952	1.763	7.017	6.172	3.086	5.952	4.372	8.891	6.172	4.849	10.507
Ophiarachnella_gorgonia	Ophiodermatidae	C4	Shallow	Shallow	Shallow	Shallow	Shallow	ND4	64.469	35.531	-0.356701	-0.306818	42.125	22.344	24.103	11.429	11.51	4.765	6.048	9.897	5.352	4.912	1.466	6.048	5.609	2.493	4.912	4.765	9.751	5.609	5.352	11.51
Ophioplocus_incipiens	Hemieuryalidae	C3	Deep	DeepAnt	Deep	DeepAnt	Deep	ND4	59.823	40.177	-0.347985	-0.050431	31.42	28.403	27.079	13.098	10.42	3.756	8.211	7.511	4.013	6.038	1.841	8.211	6.112	4.197	6.038	3.756	9.352	6.112	4.013	10.42
Ophionotus_victoriae	Ophiuridae	C5	Deep	DeepAnt	Deep	DeepAnt	Deep	ND4	65.492	34.508	-0.110638	0.091928	29.736	35.756	19.163	15.345	11.94	4.298	7.017	9.478	4.739	4.262	1.249	7.017	5.547	3.159	4.262	4.298	10.507	5.547	4.739	11.94
Gorgonocephalus_chilensis	Gorgonocephalidae	C6	Deep	DeepAnt	Deep	DeepAnt	Deep	ND4	73.407	26.593	-0.173554	-0.045908	38.388	35.018	15.604	10.989	15.652	3.702	5.755	11.584	3.922	2.456	1.173	5.755	5.169	1.979	2.456	3.702	11.95	5.169	3.922	15.652
Astrohamma_tuberculatum	Gorgonocephalidae	C6	Shallow	DeepAnt	Shallow	DeepAnt	Antartic	ND4	75.311	24.689	-0.115727	-0.081712	40.733	34.579	13.773	10.916	16.239	3.079	5.132	13.196	3.849	2.493	0.88	5.132	5.169	1.613	2.493	3.079	12.39	5.169	3.849	16.239
Astrospartus_mediterraneus	Gorgonocephalidae	C6	Shallow	Shallow	Shallow	Shallow	Shallow	ND4	72.416	27.584	-0.208443	-0.127638	40.83	31.587	16.667	10.917	15.186	4.079	5.608	11.362	4.516	2.586	1.092	5.608	5.208	1.894	2.586	4.079	11.289	5.208	4.516	15.186
Astrotoma_agassizii2	Gorgonocephalidae	C6	Deep	DeepAnt	Deep	DeepAnt	Deep	ND4	71.868	28.132	-0.171875	-0.139653	40.952	30.916	16.484	11.648	14.406	3.776	5.645	12.097	4.326	2.933	1.173	5.645	5.609	1.76	2.933	3.776	11.584	5.609	4.326	14.406
Ophiosteira_antarctica	Ophiopyrgidae	C5	Shallow	DeepAnt	Shallow	DeepAnt	Antartic	ND4	67.839	32.161	-0.198178	0.019438	33.26	34.579	19.267	12.894	12.683	3.226	6.745	11.29	3.922	3.959	1.466	6.745	5.865	3.006	3.959	3.226	11.437	5.865	3.922	12.683
Ophiosteira_sp	Ophiopyrgidae	C5	Shallow	DeepAnt	Shallow	DeepAnt	Antartic	ND4	67.474	32.526	-0.146727	0.022851	32.966	34.508	18.649	13.877	12.454	3.564	6.503	11.242	4.298	4.445	1.029	6.503	5.658	2.572	4.445	3.564	11.315	5.658	4.298	12.454
Ophioplinthus_brevirima	Ophiopyrgidae	C5	Deep	DeepAnt	Deep	DeepAnt	Deep	ND4	68.062	31.938	-0.227586	-0.022654	34.802	33.26	19.604	12.335	12.675	3.711	6.943	10.727	4.409	3.6	1.029	6.943	6.098	2.572	3.6	3.711	10.801	6.098	4.409	12.675
Ophioplinthus_gelida	Ophiopyrgidae	C5	Deep	DeepAnt	Deep	DeepAnt	Deep	ND4	64.762	35.238	-0.255717	0.140271	27.839	36.923	22.125	13.114	11.29	4.289	6.928	9.897	4.582	4.655	1.466	6.928	5.718	2.933	4.655	4.289	10.777	5.718	4.582	11.29
Ophioplocus_japonicus	Hemieuryalidae	C3	Shallow	Shallow	Shallow	Shallow	Shallow	ND4	61.527	38.473	-0.396947	-0.217184	37.445	24.082	26.872	11.601	10.507	4.372	7.127	8.744	4.445	6.135	1.543	7.127	5.878	2.866	6.135	4.372	9.919	5.878	4.445	10.507
Ophiura_albida	Ophiuridae	C5	Shallow	Shallow	Shallow	Shallow	Shallow	ND4	67.327	32.673	-0.110112	0.02072	32.966	34.361	18.135	14.537	12.564	4.225	6.466	10.434	4.372	3.894	1.616	6.466	5.18	3.012	3.894	4.225	11.536	5.18	4.372	12.564
Ophiuroglypha_kinbergi	Ophiopyrgidae	C5	Shallow	Shallow	Shallow	Shallow	Shallow	ND4	67.548	32.452	-0.036199	0.104348	30.25	37.298	16.814	15.639	13.519	4.041	6.429	9.772	4.115	3.857	1.837	6.429	5.327	3.012	3.857	4.041	10.801	5.327	4.115	13.519
Ophiura_lutkeni	Ophiuridae	C5	Shallow	Shallow	Shallow	Shallow	Shallow	ND4	66.446	33.554	-0.142232	0.001105	33.186	33.26	19.163	14.391	12.564	4.298	6.65	9.699	4.629	3.894	1.616	6.65	5.878	2.719	3.894	4.298	10.14	5.878	4.629	12.564
Ophiura_sarsii	Ophiuridae	C5	Shallow	Shallow	Shallow	Shallow	Shallow	ND4	66.006	33.994	-0.114471	0.058954	31.057	34.949	18.943	15.051	12.05	4.482	6.943	9.552	4.776	3.968	1.323	6.943	5.474	3.086	3.968	4.482	10.654	5.474	4.776	12.05
Acanthaster_brevispinus	.	.	OG	OG	OG	OG	OG	ND4L	61.616	38.384	-0.421053	-0.027322	31.65	29.966	27.273	11.111	9.291	5.236	7.77	8.446	4.73	4.73	2.027	7.77	5.236	4.054	4.73	5.236	11.486	5.236	4.73	9.291
Amphiura_sp	Amphiuridae	C1	Deep	DeepAnt	Seep	Seep	Seep	ND4L	65.986	34.014	-0.42	0.010309	32.653	33.333	24.15	9.864	11.775	3.754	9.215	8.191	3.072	3.413	1.365	9.215	7.509	2.389	3.413	3.754	10.58	7.509	3.072	11.775
Amphiura_sp_JN-2020	Amphiuridae	C1	Deep	DeepAnt	Deep	DeepAnt	Antartic	ND4L	64.31	35.69	-0.207547	0.026178	31.313	32.997	21.549	14.141	12.669	1.858	9.122	8.446	2.196	5.574	1.014	9.122	7.432	3.041	5.574	1.858	9.797	7.432	2.196	12.669
Amphioplus_laevis	Amphiuridae	C1	Shallow	Shallow	Shallow	Shallow	Shallow	ND4L	73.737	26.263	-0.205128	0.077626	34.007	39.731	15.825	10.438	15.372	2.872	7.432	11.149	2.872	2.534	0.338	7.432	5.743	2.027	2.534	2.872	12.838	5.743	2.872	15.372
Amphipholis_squamata	Amphiuridae	C1	Shallow	Shallow	Shallow	Shallow	Shallow	ND4L	73.401	26.599	-0.316456	0.091743	33.333	40.067	17.508	9.091	15.203	2.872	8.446	10.135	2.027	2.534	0.338	8.446	6.25	1.689	2.534	2.872	13.176	6.25	2.027	15.203
Amphiura_digitula2	Amphiuridae	C1	Shallow	Shallow	Shallow	Shallow	Shallow	ND4L	71.717	28.283	-0.333333	0.107981	31.987	39.731	18.855	9.428	15.034	2.534	7.432	10.811	2.703	3.041	1.014	7.432	6.588	2.027	3.041	2.534	11.486	6.588	2.703	15.034
Amphiura_sinicola	Amphiuridae	C1	Shallow	Shallow	Shallow	Shallow	Shallow	ND4L	74.747	25.253	-0.253333	0.108108	33.333	41.414	15.825	9.428	17.905	2.872	5.743	10.811	3.547	2.027	1.351	5.743	6.081	1.689	2.027	2.872	9.797	6.081	3.547	17.905
Histampica_haimaensis	Ophiothamnidae	C2	Deep	DeepAnt	Seep	Seep	Seep	ND4L	76.531	23.469	0.043478	0.173333	31.633	44.898	11.224	12.245	19.113	3.925	4.608	10.58	4.608	1.877	0.683	4.608	3.925	2.048	1.877	3.925	10.58	3.925	4.608	19.113
Ophiopholis_aculeata	Ophiopholidae	C2	Deep	DeepAnt	Deep	DeepAnt	Deep	ND4L	70.103	29.897	-0.241379	-0.147059	40.206	29.897	18.557	11.34	11.724	5.172	7.759	10.345	4.483	2.069	0.69	7.759	5.69	2.069	2.069	5.172	13.103	5.69	4.483	11.724
Ophiopholis_japonica2	Ophiopholidae	C2	Deep	DeepAnt	Deep	DeepAnt	Deep	ND4L	70.408	29.592	-0.149425	-0.014493	35.714	34.694	17.007	12.585	12.116	4.437	6.997	11.604	3.242	2.56	2.048	6.997	4.778	3.072	2.56	4.437	15.017	4.778	3.242	12.116
Ophiopholis_mirabilis	Ophiopholidae	C2	Shallow	Shallow	Shallow	Shallow	Shallow	ND4L	74.15	25.85	0	-0.055046	39.116	35.034	12.925	12.925	15.7	4.437	6.314	10.58	3.413	2.218	1.024	6.314	4.266	2.048	2.218	4.437	13.652	4.266	3.413	15.7
Ophiophthalmus_sp	Ophiacanthidae	C4	Deep	DeepAnt	Seep	Seep	Seep	ND4L	82.667	17.333	-0.153846	-0.016129	42	40.667	10	7.333	19.231	1.672	4.682	15.719	2.174	1.505	0.334	4.682	3.512	2.007	1.505	1.672	16.388	3.512	2.174	19.231
Ophiacantha_linea	Ophiacanthidae	C4	Deep	DeepAnt	Deep	DeepAnt	Deep	ND4L	79.125	20.875	-0.225806	0.046809	37.71	41.414	12.795	8.081	18.919	3.041	5.405	12.162	1.858	2.196	1.014	5.405	3.547	1.689	2.196	3.041	15.203	3.547	1.858	18.919
Ophiocomina_nigra	Ophiotomidae	C4	Shallow	Shallow	Shallow	Shallow	Shallow	ND4L	65.32	34.68	-0.165049	-0.010309	32.997	32.323	20.202	14.478	11.318	4.054	7.77	9.459	3.378	4.561	1.689	7.77	5.405	3.378	4.561	4.054	12.5	5.405	3.378	11.318
Ophiomastix_mixta	Ophiocomidae	C4	Shallow	Shallow	Shallow	Shallow	Shallow	ND4L	72.391	27.609	-0.390244	-0.051163	38.047	34.343	19.192	8.418	13.682	4.561	7.095	10.811	3.041	3.041	0.676	7.095	4.899	1.351	3.041	4.561	14.527	4.899	3.041	13.682
Ophiarachnella_gorgonia	Ophiodermatidae	C4	Shallow	Shallow	Shallow	Shallow	Shallow	ND4L	72.391	27.609	-0.487805	-0.162791	42.088	30.303	20.539	7.071	15.372	3.378	6.926	10.473	2.872	3.041	1.014	6.926	5.743	1.689	3.041	3.378	12.162	5.743	2.872	15.372
Ophioplocus_incipiens	Hemieuryalidae	C3	Deep	DeepAnt	Deep	DeepAnt	Deep	ND4L	65.32	34.68	-0.339806	0.020619	31.987	33.333	23.232	11.448	13.682	2.027	8.446	8.446	2.534	4.73	1.689	8.446	7.264	3.378	4.73	2.027	9.122	7.264	2.534	13.682
Ophionotus_victoriae	Ophiuridae	C5	Deep	DeepAnt	Deep	DeepAnt	Deep	ND4L	74.411	25.589	-0.289474	0.085973	34.007	40.404	16.498	9.091	15.034	3.209	6.757	12.162	3.378	2.027	0.676	6.757	5.574	2.027	2.027	3.209	13.176	5.574	3.378	15.034
Gorgonocephalus_chilensis	Gorgonocephalidae	C6	Deep	DeepAnt	Deep	DeepAnt	Deep	ND4L	81.145	18.855	-0.25	-0.103734	44.781	36.364	11.785	7.071	20.439	2.196	5.068	12.838	2.703	1.351	0.338	5.068	4.223	1.689	1.351	2.196	13.176	4.223	2.703	20.439
Astrohamma_tuberculatum	Gorgonocephalidae	C6	Shallow	DeepAnt	Shallow	DeepAnt	Antartic	ND4L	82.155	17.845	-0.169811	-0.065574	43.771	38.384	10.438	7.407	20.946	1.52	4.73	13.851	2.027	1.52	0.676	4.73	4.561	1.351	1.52	1.52	13.514	4.561	2.027	20.946
Astrospartus_mediterraneus	Gorgonocephalidae	C6	Shallow	Shallow	Shallow	Shallow	Shallow	ND4L	78.114	21.886	-0.507692	-0.103448	43.098	35.017	16.498	5.387	19.088	2.196	6.926	10.811	1.689	2.027	0.338	6.926	5.743	1.014	2.027	2.196	12.5	5.743	1.689	19.088
Astrotoma_agassizii2	Gorgonocephalidae	C6	Deep	DeepAnt	Deep	DeepAnt	Deep	ND4L	78.788	21.212	-0.333333	-0.179487	46.465	32.323	14.141	7.071	17.399	2.534	6.25	13.176	3.041	1.014	0.338	6.25	5.405	1.689	1.014	2.534	13.514	5.405	3.041	17.399
Ophiosteira_antarctica	Ophiopyrgidae	C5	Shallow	DeepAnt	Shallow	DeepAnt	Antartic	ND4L	78.451	21.549	-0.25	0.04721	37.374	41.077	13.468	8.081	18.243	2.027	6.757	12.162	1.689	1.689	0.676	6.757	4.73	2.365	1.689	2.027	14.527	4.73	1.689	18.243
Ophiosteira_sp	Ophiopyrgidae	C5	Shallow	DeepAnt	Shallow	DeepAnt	Antartic	ND4L	77.441	22.559	-0.373134	0.008696	38.384	39.057	15.488	7.071	18.074	1.858	6.25	12.5	2.365	1.689	1.014	6.25	5.068	2.703	1.689	1.858	13.176	5.068	2.365	18.074
Ophioplinthus_brevirima	Ophiopyrgidae	C5	Deep	DeepAnt	Deep	DeepAnt	Deep	ND4L	77.104	22.896	-0.294118	-0.030568	39.731	37.374	14.815	8.081	17.061	2.365	6.926	12.162	2.703	1.52	0.338	6.926	5.236	2.365	1.52	2.365	13.514	5.236	2.703	17.061
Ophioplinthus_gelida	Ophiopyrgidae	C5	Deep	DeepAnt	Deep	DeepAnt	Deep	ND4L	74.747	25.253	-0.44	0.216216	29.293	45.455	18.182	7.071	15.203	2.196	7.432	12.5	2.703	2.196	0.338	7.432	5.236	3.041	2.196	2.196	14.189	5.236	2.703	15.203
Ophioplocus_japonicus	Hemieuryalidae	C3	Shallow	Shallow	Shallow	Shallow	Shallow	ND4L	71.044	28.956	-0.511628	-0.203791	42.761	28.283	21.886	7.071	14.696	3.378	7.264	10.135	2.027	4.223	1.014	7.264	5.574	1.351	4.223	3.378	13.176	5.574	2.027	14.696
Ophiura_albida	Ophiuridae	C5	Shallow	Shallow	Shallow	Shallow	Shallow	ND4L	81.818	18.182	-0.185185	0.053498	38.721	43.098	10.774	7.407	18.412	1.858	6.081	14.527	2.196	0.507	0.338	6.081	5.068	1.689	0.507	1.858	15.203	5.068	2.196	18.412
Ophiuroglypha_kinbergi	Ophiopyrgidae	C5	Shallow	Shallow	Shallow	Shallow	Shallow	ND4L	80.471	19.529	-0.172414	0.029289	39.057	41.414	11.448	8.081	17.905	2.027	5.405	14.865	2.703	1.351	0.338	5.405	4.392	2.027	1.351	2.027	15.203	4.392	2.703	17.905
Ophiura_lutkeni	Ophiuridae	C5	Shallow	Shallow	Shallow	Shallow	Shallow	ND4L	76.768	23.232	-0.217391	0	38.384	38.384	14.141	9.091	17.061	3.209	5.236	12.838	3.716	1.351	1.351	5.236	5.068	2.027	1.351	3.209	12.5	5.068	3.716	17.061
Ophiura_sarsii	Ophiuridae	C5	Shallow	Shallow	Shallow	Shallow	Shallow	ND4L	77.778	22.222	-0.30303	-0.056277	41.077	36.7	14.478	7.744	18.243	2.703	6.081	11.824	3.378	1.014	0.676	6.081	5.405	2.027	1.014	2.703	11.824	5.405	3.378	18.243
Acanthaster_brevispinus	.	.	OG	OG	OG	OG	OG	ND5	56.309	43.691	-0.311673	-0.105509	31.125	25.184	28.654	15.037	8.469	5.129	6.865	7.68	6.234	6.286	2.472	6.865	6.234	4.208	6.286	5.129	7.207	6.234	6.234	8.469
Amphiura_sp	Amphiuridae	C1	Deep	DeepAnt	Seep	Seep	Seep	ND5	62.812	37.188	-0.195122	0.045126	29.989	32.823	22.222	14.966	11.429	4.169	7.317	8.508	4.935	4.651	1.702	7.317	6.183	3.573	4.651	4.169	8.849	6.183	4.935	11.429
Amphiura_sp_JN-2020	Amphiuridae	C1	Deep	DeepAnt	Deep	DeepAnt	Antartic	ND5	58.375	41.625	-0.248663	-0.058151	30.885	27.49	25.988	15.637	8.992	4.594	7.461	8.129	5.457	6.013	1.893	7.461	6.264	3.953	6.013	4.594	8.463	6.264	5.457	8.992
Amphioplus_laevis	Amphiuridae	C1	Shallow	Shallow	Shallow	Shallow	Shallow	ND5	59.017	40.983	-0.106267	0.169347	24.511	34.506	22.669	18.314	10.754	4.358	8.212	6.201	4.358	6.089	1.844	8.212	6.397	3.631	6.089	4.358	7.989	6.397	4.358	10.754
Amphipholis_squamata	Amphiuridae	C1	Shallow	Shallow	Shallow	Shallow	Shallow	ND5	67.058	32.942	-0.111864	0.112406	29.76	37.298	18.314	14.629	12.626	3.799	7.458	9.665	4.19	3.715	1.117	7.458	5.419	3.52	3.715	3.799	11.285	5.419	4.19	12.626
Amphiura_digitula2	Amphiuridae	C1	Shallow	Shallow	Shallow	Shallow	Shallow	ND5	65.264	34.736	-0.169628	0.205503	25.926	39.338	20.314	14.422	14.402	3.846	7.412	6.962	3.79	4.604	1.572	7.412	5.39	3.537	4.604	3.846	9.04	5.39	3.79	14.402
Amphiura_sinicola	Amphiuridae	C1	Shallow	Shallow	Shallow	Shallow	Shallow	ND5	64.278	35.722	-0.200622	0.076923	29.667	34.611	21.444	14.278	11.812	4.225	7.171	8.949	4.808	4.391	1.501	7.171	5.225	4.002	4.391	4.225	10.283	5.225	4.808	11.812
Histampica_haimaensis	Ophiothamnidae	C2	Deep	DeepAnt	Seep	Seep	Seep	ND5	62.382	37.618	0.304734	0.252453	23.317	39.065	13.077	24.541	12.138	4.844	4.677	9.521	5.317	6.264	2.561	4.677	4.371	3.341	6.264	4.844	9.354	4.371	5.317	12.138
Ophiopholis_aculeata	Ophiopholidae	C2	Deep	DeepAnt	Deep	DeepAnt	Deep	ND5	62.346	37.654	-0.14456	0.015302	30.696	31.65	21.549	16.105	10.556	4.716	6.878	9.04	5.278	4.829	1.853	6.878	4.885	4.38	4.829	4.716	10.444	4.885	5.278	10.556
Ophiopholis_japonica2	Ophiopholidae	C2	Deep	DeepAnt	Deep	DeepAnt	Deep	ND5	61.064	38.936	-0.099281	0.040367	29.3	31.765	21.401	17.535	11.295	4.4	6.726	8.128	5.101	5.241	2.41	6.726	5.101	4.709	5.241	4.4	9.025	5.101	5.101	11.295
Ophiopholis_mirabilis	Ophiopholidae	C2	Shallow	Shallow	Shallow	Shallow	Shallow	ND5	58.824	41.176	-0.145578	0.112381	26.106	32.717	23.585	17.591	11.043	4.68	6.811	6.895	5.101	5.381	3.307	6.811	5.633	4.877	5.381	4.68	7.623	5.633	5.101	11.043
Ophiophthalmus_sp	Ophiacanthidae	C4	Deep	DeepAnt	Seep	Seep	Seep	ND5	70.918	29.082	-0.173489	0.032774	34.297	36.621	17.063	12.018	13.897	3.8	6.183	11.571	4.027	3.261	1.078	6.183	4.878	2.609	3.261	3.8	12.649	4.878	4.027	13.897
Ophiacantha_linea	Ophiacanthidae	C4	Deep	DeepAnt	Deep	DeepAnt	Deep	ND5	67.845	32.155	-0.211169	0.012407	33.502	34.343	19.473	12.682	13.7	4.127	6.485	9.601	4.239	4.239	1.123	6.485	4.632	3.088	4.239	4.127	11.342	4.632	4.239	13.7
Ophiocomina_nigra	Ophiotomidae	C4	Shallow	Shallow	Shallow	Shallow	Shallow	ND5	62.312	37.688	-0.081481	0.0681	29.034	33.277	20.38	17.309	11.536	5.112	6.676	7.821	5.475	4.86	1.844	6.676	4.916	3.966	4.86	5.112	9.218	4.916	5.475	11.536
Ophiomastix_mixta	Ophiocomidae	C4	Shallow	Shallow	Shallow	Shallow	Shallow	ND5	63.255	36.745	-0.245053	0.073386	29.306	33.949	22.875	13.87	11.64	4.785	6.799	8.394	5.568	4.113	1.903	6.799	5.008	4.477	4.113	4.785	9.401	5.008	5.568	11.64
Ophiarachnella_gorgonia	Ophiodermatidae	C4	Shallow	Shallow	Shallow	Shallow	Shallow	ND5	64.643	35.357	-0.284579	-0.125217	36.369	28.274	22.709	12.648	12.458	4.387	6.693	8.774	4.781	4.865	1.35	6.693	5.793	2.643	4.865	4.387	9.28	5.793	4.781	12.458
Ophioplocus_incipiens	Hemieuryalidae	C3	Deep	DeepAnt	Deep	DeepAnt	Deep	ND5	61.491	38.509	-0.182081	0.067873	28.659	32.832	22.76	15.748	11.748	3.536	7.739	7.739	4.092	5.568	1.837	7.739	5.846	4.287	5.568	3.536	9.076	5.846	4.092	11.748
Ophionotus_victoriae	Ophiuridae	C5	Deep	DeepAnt	Deep	DeepAnt	Deep	ND5	65.831	34.169	-0.099511	0.055038	31.104	34.727	18.785	15.385	12.103	3.737	6.302	10.764	5.494	3.793	1.506	6.302	4.992	4.573	3.793	3.737	10.318	4.992	5.494	12.103
Gorgonocephalus_chilensis	Gorgonocephalidae	C6	Deep	DeepAnt	Deep	DeepAnt	Deep	ND5	71.171	28.829	-0.164062	0.037975	34.234	36.937	16.779	12.05	15.239	3.746	5.887	10.704	4.056	3.127	1.352	5.887	5.014	2.535	3.127	3.746	11.268	5.014	4.056	15.239
Astrohamma_tuberculatum	Gorgonocephalidae	C6	Shallow	DeepAnt	Shallow	DeepAnt	Antartic	ND5	74.329	25.671	-0.150327	0.017306	36.521	37.808	14.765	10.906	15.277	3.525	6.156	12.199	4.085	2.098	0.504	6.156	4.98	2.238	2.098	3.525	12.815	4.98	4.085	15.277
Astrospartus_mediterraneus	Gorgonocephalidae	C6	Shallow	Shallow	Shallow	Shallow	Shallow	ND5	71.243	28.757	-0.229862	0.015067	35.085	36.158	17.684	11.073	15.659	3.872	6.246	9.836	4.296	2.996	0.848	6.246	5.54	1.979	2.996	3.872	10.119	5.54	4.296	15.659
Astrotoma_agassizii2	Gorgonocephalidae	C6	Deep	DeepAnt	Deep	DeepAnt	Deep	ND5	72.072	27.928	-0.173387	-0.0125	36.486	35.586	16.385	11.543	15.183	3.944	6.085	10.817	4.225	2.986	0.676	6.085	4.958	2.085	2.986	3.944	11.662	4.958	4.225	15.183
Ophiosteira_antarctica	Ophiopyrgidae	C5	Shallow	DeepAnt	Shallow	DeepAnt	Antartic	ND5	70.569	29.431	-0.127072	0.030722	34.201	36.369	16.585	12.846	13.286	3.118	6.209	12.69	3.932	3.498	1.085	6.209	5.098	2.983	3.498	3.118	12.961	5.098	3.932	13.286
Ophiosteira_sp	Ophiopyrgidae	C5	Shallow	DeepAnt	Shallow	DeepAnt	Antartic	ND5	70.178	29.822	-0.091589	0.008737	34.783	35.396	16.276	13.545	13.581	3.486	5.968	12.047	4.267	3.848	0.837	5.968	4.35	3.235	3.848	3.486	12.883	4.35	4.267	13.581
Ophioplinthus_brevirima	Ophiopyrgidae	C5	Deep	DeepAnt	Deep	DeepAnt	Deep	ND5	69.529	30.471	-0.186004	-0.057304	36.756	32.772	18.07	12.402	13.083	3.93	5.952	11.791	4.913	3.65	0.73	5.952	4.801	2.864	3.65	3.93	11.96	4.801	4.913	13.083
Ophioplinthus_gelida	Ophiopyrgidae	C5	Deep	DeepAnt	Deep	DeepAnt	Deep	ND5	64.27	35.73	-0.269891	0.082394	29.487	34.783	22.687	13.043	11.517	4.099	6.525	9.983	4.434	5.131	1.785	6.525	4.964	3.681	5.131	4.099	11.21	4.964	4.434	11.517
Ophioplocus_japonicus	Hemieuryalidae	C3	Shallow	Shallow	Shallow	Shallow	Shallow	ND5	62.895	37.105	-0.306428	-0.068783	33.611	29.285	24.237	12.867	11.238	4.218	7.492	8.491	4.329	5.244	1.498	7.492	5.882	3.219	5.244	4.218	9.989	5.882	4.329	11.238
Ophiura_albida	Ophiuridae	C5	Shallow	Shallow	Shallow	Shallow	Shallow	ND5	68.568	31.432	-0.088968	-0.044046	35.794	32.774	17.114	14.318	12.731	4.393	6.295	10.856	4.896	3.358	1.175	6.295	5.344	2.63	3.358	4.393	11.304	5.344	4.896	12.731
Ophiuroglypha_kinbergi	Ophiopyrgidae	C5	Shallow	Shallow	Shallow	Shallow	Shallow	ND5	65.535	34.465	-0.014778	0.1019	29.428	36.106	17.487	16.978	12.373	4.473	6.512	9.4	4.983	4.332	1.416	6.512	5.379	3.058	4.332	4.473	10.023	5.379	4.983	12.373
Ophiura_lutkeni	Ophiuridae	C5	Shallow	Shallow	Shallow	Shallow	Shallow	ND5	63.768	36.232	-0.129231	-0.026224	32.72	31.048	20.457	15.775	11.656	4.155	7.027	9.035	5.326	3.988	1.785	7.027	6.525	3.458	3.988	4.155	8.366	6.525	5.326	11.656
Ophiura_sarsii	Ophiuridae	C5	Shallow	Shallow	Shallow	Shallow	Shallow	ND5	63.712	36.288	-0.099846	0.04287	30.491	33.222	19.955	16.332	11.573	4.099	6.972	9.202	4.629	4.657	1.896	6.972	5.884	3.514	4.657	4.099	9.76	5.884	4.629	11.573
Acanthaster_brevispinus	.	.	OG	OG	OG	OG	OG	ND6	55.828	44.172	0.444444	0.487179	14.315	41.513	12.27	31.902	10.348	6.455	5.635	5.533	6.148	8.299	2.049	5.635	3.381	3.893	8.299	6.455	7.992	3.381	6.148	10.348
Amphiura_sp	Amphiuridae	C1	Deep	DeepAnt	Seep	Seep	Seep	ND6	64.375	35.625	0.380117	0.449838	17.708	46.667	11.042	24.583	15.553	4.28	5.219	7.098	5.01	5.115	2.505	5.219	4.489	3.967	5.115	4.28	7.098	4.489	5.01	15.553
Amphiura_sp_JN-2020	Amphiuridae	C1	Deep	DeepAnt	Deep	DeepAnt	Antartic	ND6	58.542	41.458	0.18593	0.395018	17.708	40.833	16.875	24.583	10.23	5.01	7.411	6.681	4.489	6.263	2.505	7.411	5.219	4.175	6.263	5.01	9.395	5.219	4.489	10.23
Amphioplus_laevis	Amphiuridae	C1	Shallow	Shallow	Shallow	Shallow	Shallow	ND6	61.875	38.125	0.322404	0.407407	18.333	43.542	12.917	25.208	12.422	5.01	6.785	6.681	5.637	5.428	1.253	6.785	5.532	3.132	5.428	5.01	7.307	5.532	5.637	12.422
Amphipholis_squamata	Amphiuridae	C1	Shallow	Shallow	Shallow	Shallow	Shallow	ND6	67.49	32.51	0.329114	0.335366	22.428	45.062	10.905	21.605	12.371	4.124	6.495	10.722	4.33	3.814	1.649	6.495	5.67	2.68	3.814	4.124	11.34	5.67	4.33	12.371
Amphiura_digitula2	Amphiuridae	C1	Shallow	Shallow	Shallow	Shallow	Shallow	ND6	65.424	34.576	0.42515	0.291139	23.188	42.236	9.938	24.638	13.797	4.772	5.705	8.506	5.083	5.083	1.452	5.705	4.461	2.905	5.083	4.772	9.336	4.461	5.083	13.797
Amphiura_sinicola	Amphiuridae	C1	Shallow	Shallow	Shallow	Shallow	Shallow	ND6	66.042	33.958	0.337423	0.268139	24.167	41.875	11.25	22.708	13.257	5.115	5.637	8.977	4.906	5.01	1.461	5.637	4.175	2.714	5.01	5.115	10.647	4.175	4.906	13.257
Histampica_haimaensis	Ophiothamnidae	C2	Deep	DeepAnt	Seep	Seep	Seep	ND6	64.182	35.818	0.317919	0.432258	18.219	45.963	12.215	23.602	14.938	4.668	4.149	8.299	5.602	5.705	2.49	4.149	3.631	3.942	5.705	4.668	7.884	3.631	5.602	14.938
Ophiopholis_aculeata	Ophiopholidae	C2	Deep	DeepAnt	Deep	DeepAnt	Deep	ND6	65.417	34.583	0.240964	0.477707	17.083	48.333	13.125	21.458	14.405	5.115	6.472	6.681	4.906	4.906	1.044	6.472	5.01	2.296	4.906	5.115	8.351	5.01	4.906	14.405
Ophiopholis_japonica2	Ophiopholidae	C2	Deep	DeepAnt	Deep	DeepAnt	Deep	ND6	59.792	40.208	0.150259	0.505226	14.792	45	17.083	23.125	12.422	5.01	7.411	5.01	5.01	5.219	2.505	7.411	4.906	5.01	5.219	5.01	7.516	4.906	5.01	12.422
Ophiopholis_mirabilis	Ophiopholidae	C2	Shallow	Shallow	Shallow	Shallow	Shallow	ND6	60.417	39.583	0.284211	0.503448	15	45.417	14.167	25.417	12.63	5.741	5.532	6.263	6.576	5.219	2.505	5.532	4.906	3.967	5.219	5.741	6.054	4.906	6.576	12.63
Ophiophthalmus_sp	Ophiacanthidae	C4	Deep	DeepAnt	Seep	Seep	Seep	ND6	74.28	25.72	0.248	0.191136	30.041	44.239	9.671	16.049	18.557	3.299	4.021	11.34	4.433	3.608	0.825	4.021	3.608	2.268	3.608	3.299	10.515	3.608	4.433	18.557
Ophiacantha_linea	Ophiacanthidae	C4	Deep	DeepAnt	Deep	DeepAnt	Deep	ND6	69.167	30.833	0.297297	0.307229	23.958	45.208	10.833	20	16.284	3.862	5.532	8.977	4.175	4.28	1.461	5.532	4.697	2.505	4.28	3.862	9.395	4.697	4.175	16.284
Ophiocomina_nigra	Ophiotomidae	C4	Shallow	Shallow	Shallow	Shallow	Shallow	ND6	62.092	37.908	0.057471	0.319298	21.133	40.959	17.865	20.044	11.245	4.803	6.441	8.515	5.131	4.803	2.62	6.441	5.677	3.712	4.803	4.803	8.952	5.677	5.131	11.245
Ophiomastix_mixta	Ophiocomidae	C4	Shallow	Shallow	Shallow	Shallow	Shallow	ND6	64.417	35.583	0.425287	0.434921	18.2	46.217	10.225	25.358	13.525	5.533	5.533	7.582	5.84	4.816	1.639	5.533	3.791	3.689	4.816	5.533	9.016	3.791	5.84	13.525
Ophiarachnella_gorgonia	Ophiodermatidae	C4	Shallow	Shallow	Shallow	Shallow	Shallow	ND6	64.182	35.818	0.398844	0.529032	15.114	49.068	10.766	25.052	15.456	5.187	5.809	5.602	5.809	4.772	1.452	5.809	4.253	3.734	4.772	5.187	6.639	4.253	5.809	15.456
Ophioplocus_incipiens	Hemieuryalidae	C3	Deep	DeepAnt	Deep	DeepAnt	Deep	ND6	63.561	36.439	0.284091	0.407166	18.841	44.72	13.043	23.395	14.004	4.668	6.432	6.639	4.564	5.705	1.452	6.432	5.187	2.697	5.705	4.668	8.091	5.187	4.564	14.004
Ophionotus_victoriae	Ophiuridae	C5	Deep	DeepAnt	Deep	DeepAnt	Deep	ND6	67.083	32.917	0.367089	0.354037	21.667	45.417	10.417	22.5	13.048	6.472	5.95	8.142	5.219	4.489	0.835	5.95	3.758	1.67	4.489	6.472	11.482	3.758	5.219	13.048
Gorgonocephalus_chilensis	Gorgonocephalidae	C6	Deep	DeepAnt	Deep	DeepAnt	Deep	ND6	71.667	28.333	0.397059	0.319767	24.375	47.292	8.542	19.792	15.866	4.802	5.637	9.603	4.489	3.653	0.418	5.637	3.967	1.67	3.653	4.802	11.482	3.967	4.489	15.866
Astrohamma_tuberculatum	Gorgonocephalidae	C6	Shallow	DeepAnt	Shallow	DeepAnt	Antartic	ND6	74.792	25.208	0.454545	0.337047	24.792	50	6.875	18.333	16.806	4.071	5.428	11.065	3.967	2.818	0.418	5.428	4.489	1.253	2.818	4.071	12.109	4.489	3.967	16.806
Astrospartus_mediterraneus	Gorgonocephalidae	C6	Shallow	Shallow	Shallow	Shallow	Shallow	ND6	72.708	27.292	0.450382	0.455587	19.792	52.917	7.5	19.792	17.85	4.802	5.428	8.351	5.115	2.505	0.626	5.428	4.593	1.67	2.505	4.802	8.768	4.593	5.115	17.85
Astrotoma_agassizii2	Gorgonocephalidae	C6	Deep	DeepAnt	Deep	DeepAnt	Deep	ND6	69.583	30.417	0.39726	0.347305	22.708	46.875	9.167	21.25	15.449	4.697	5.637	8.977	4.906	4.28	0.418	5.637	4.593	1.67	4.28	4.697	9.812	4.593	4.906	15.449
Ophiosteira_antarctica	Ophiopyrgidae	C5	Shallow	DeepAnt	Shallow	DeepAnt	Antartic	ND6	72.024	27.976	0.347518	0.278237	25.992	46.032	9.127	18.849	15.01	3.678	5.368	11.928	4.274	3.579	0.795	5.368	4.97	1.789	3.579	3.678	11.73	4.97	4.274	15.01
Ophiosteira_sp	Ophiopyrgidae	C5	Shallow	DeepAnt	Shallow	DeepAnt	Antartic	ND6	68.675	31.325	0.333333	0.333333	22.892	45.783	10.442	20.884	13.783	4.728	6.338	9.457	4.628	4.326	0.402	6.338	4.427	2.213	4.326	4.728	11.469	4.427	4.628	13.783
Ophioplinthus_brevirima	Ophiopyrgidae	C5	Deep	DeepAnt	Deep	DeepAnt	Deep	ND6	65.591	34.409	0.4625	0.462295	17.634	47.957	9.247	25.161	14.332	5.927	5.603	6.897	5.603	5.172	0.862	5.603	3.556	2.586	5.172	5.927	9.267	3.556	5.603	14.332
Ophioplinthus_gelida	Ophiopyrgidae	C5	Deep	DeepAnt	Deep	DeepAnt	Deep	ND6	62.472	37.528	0.329412	0.413428	18.322	44.15	12.583	24.945	13.274	5.863	5.088	7.08	5.752	5.752	2.212	5.088	3.982	3.097	5.752	5.863	8.186	3.982	5.752	13.274
Ophioplocus_japonicus	Hemieuryalidae	C3	Shallow	Shallow	Shallow	Shallow	Shallow	ND6	61.284	38.716	0.518717	0.554054	13.665	47.619	9.317	29.4	13.174	5.705	6.017	5.809	5.913	6.639	0.83	6.017	4.461	2.49	6.639	5.705	7.054	4.461	5.913	13.174
Ophiura_albida	Ophiuridae	C5	Shallow	Shallow	Shallow	Shallow	Shallow	ND6	65.401	34.599	0.304878	0.367742	20.675	44.726	12.025	22.574	11.628	5.391	7.505	8.245	4.545	4.228	1.057	7.505	5.92	1.691	4.228	5.391	10.571	5.92	4.545	11.628
Ophiuroglypha_kinbergi	Ophiopyrgidae	C5	Shallow	Shallow	Shallow	Shallow	Shallow	ND6	63.125	36.875	0.096045	0.287129	22.5	40.625	16.667	20.208	11.482	4.384	7.933	7.724	4.28	4.175	2.088	7.933	6.159	3.758	4.175	4.384	9.603	6.159	4.28	11.482
Ophiura_lutkeni	Ophiuridae	C5	Shallow	Shallow	Shallow	Shallow	Shallow	ND6	66.042	33.958	0.386503	0.394322	20	46.042	10.417	23.542	14.405	5.741	6.889	6.054	4.384	4.071	1.67	6.889	4.802	2.296	4.071	5.741	9.395	4.802	4.384	14.405
Ophiura_sarsii	Ophiuridae	C5	Shallow	Shallow	Shallow	Shallow	Shallow	ND6	65.208	34.792	0.377246	0.456869	17.708	47.5	10.833	23.958	15.449	5.428	5.741	6.054	5.637	4.384	1.67	5.741	5.01	2.505	4.384	5.428	6.472	5.01	5.637	15.449
Acanthaster_brevispinus	.	.	OG	OG	OG	OG	OG	rrnL	55.34	44.66	0.327536	0.104094	24.79	30.55	15.016	29.644	9.035	5.894	6.703	6.023	5.602	6.218	3.821	6.703	5.894	4.339	6.218	5.894	7.124	5.894	5.602	9.035
Amphiura_sp	Amphiuridae	C1	Deep	DeepAnt	Seep	Seep	Seep	rrnL	65.612	34.388	0.200837	-0.046053	34.317	31.295	13.741	20.647	13.391	4.392	7.199	7.775	4.176	4.032	1.8	7.199	5.4	3.384	4.032	4.392	9.863	5.4	4.176	13.391
Amphiura_sp_JN-2020	Amphiuridae	C1	Deep	DeepAnt	Deep	DeepAnt	Antartic	rrnL	68.107	31.893	0.106095	-0.054968	35.925	32.181	14.255	17.639	13.869	4.899	6.952	8.357	4.251	3.134	1.585	6.952	4.575	3.314	3.134	4.899	11.383	4.575	4.251	13.869
Amphioplus_laevis	Amphiuridae	C1	Shallow	Shallow	Shallow	Shallow	Shallow	rrnL	68.398	31.602	0.173516	-0.040084	35.57	32.828	13.059	18.543	14.296	4.874	6.859	8.159	3.863	3.357	1.733	6.859	4.982	2.599	3.357	4.874	11.047	4.982	3.863	14.296
Amphipholis_squamata	Amphiuridae	C1	Shallow	Shallow	Shallow	Shallow	Shallow	rrnL	70.029	29.971	0.155131	-0.078652	37.768	32.26	12.661	17.31	14.674	4.402	6.8	9.162	3.758	2.863	1.575	6.8	4.939	2.792	2.863	4.402	11.596	4.939	3.758	14.674
Amphiura_digitula2	Amphiuridae	C1	Shallow	Shallow	Shallow	Shallow	Shallow	rrnL	70.27	29.73	0.207459	-0.047337	36.798	33.472	11.781	17.949	15.326	4.404	6.276	9.154	3.606	3.398	1.595	6.276	4.577	2.497	3.398	4.404	11.581	4.577	3.606	15.326
Amphiura_sinicola	Amphiuridae	C1	Shallow	Shallow	Shallow	Shallow	Shallow	rrnL	70.87	29.13	0.164557	-0.050989	37.242	33.628	12.168	16.962	15.24	4.649	6.162	9.373	3.801	2.915	1.697	6.162	4.428	2.583	2.915	4.649	11.956	4.428	3.801	15.24
Histampica_haimaensis	Ophiothamnidae	C2	Deep	DeepAnt	Seep	Seep	Seep	rrnL	63.938	36.062	0.165644	0.044983	30.531	33.407	15.044	21.018	12.362	4.982	6.531	8.118	4.465	4.465	2.583	6.531	4.797	3.764	4.465	4.982	10.332	4.797	4.465	12.362
Ophiopholis_aculeata	Ophiopholidae	C2	Deep	DeepAnt	Deep	DeepAnt	Deep	rrnL	67.653	32.347	0.163399	0.070833	31.431	36.223	13.531	18.816	14.175	5.113	6.206	8.322	4.619	3.138	2.186	6.206	4.831	3.103	3.138	5.113	10.226	4.831	4.619	14.175
Ophiopholis_japonica2	Ophiopholidae	C2	Deep	DeepAnt	Deep	DeepAnt	Deep	rrnL	65.319	34.681	0.149284	0.053203	30.922	34.397	14.752	19.929	12.775	5.465	6.565	7.807	4.897	3.549	2.342	6.565	4.791	3.549	3.549	5.465	10.22	4.791	4.897	12.775
Ophiopholis_mirabilis	Ophiopholidae	C2	Shallow	Shallow	Shallow	Shallow	Shallow	rrnL	66.596	33.404	0.147679	0.073016	30.867	35.729	14.235	19.168	13.611	5.43	6.523	7.687	4.654	3.491	2.045	6.523	4.69	3.103	3.491	5.43	10.367	4.69	4.654	13.611
Ophiophthalmus_sp	Ophiacanthidae	C4	Deep	DeepAnt	Seep	Seep	Seep	rrnL	71.731	28.269	0.255814	-0.065173	38.203	33.528	10.519	17.75	14.62	4.24	5.811	11.184	3.582	2.997	1.754	5.811	4.642	2.266	2.997	4.24	13.012	4.642	3.582	14.62
Ophiacantha_linea	Ophiacanthidae	C4	Deep	DeepAnt	Deep	DeepAnt	Deep	rrnL	71.877	28.123	0.263959	-0.032771	37.116	34.761	10.35	17.773	15.5	4.179	5.607	10.643	3.286	3.036	2.143	5.607	4.357	2.5	3.036	4.179	12.786	4.357	3.286	15.5
Ophiocomina_nigra	Ophiotomidae	C4	Shallow	Shallow	Shallow	Shallow	Shallow	rrnL	66.063	33.937	0.166324	-0.042194	34.425	31.638	14.146	19.791	13.354	5.3	7.218	7.183	4.568	3.173	2.022	7.218	5.091	3.417	3.173	5.3	9.972	5.091	4.568	13.354
Ophiomastix_mixta	Ophiocomidae	C4	Shallow	Shallow	Shallow	Shallow	Shallow	rrnL	67.957	32.043	0.333333	0.018987	33.333	34.624	10.681	21.362	13.845	5.416	6.636	8.106	4.627	3.192	1.578	6.636	5.057	2.367	3.192	5.416	10.402	5.057	4.627	13.845
Ophiarachnella_gorgonia	Ophiodermatidae	C4	Shallow	Shallow	Shallow	Shallow	Shallow	rrnL	67.153	32.847	0.357294	0.110651	29.861	37.292	10.556	22.292	14.315	5.281	6.081	7.922	4.795	3.753	1.807	6.081	5.455	1.946	3.753	5.281	8.965	5.455	4.795	14.315
Ophioplocus_incipiens	Hemieuryalidae	C3	Deep	DeepAnt	Deep	DeepAnt	Deep	rrnL	66.3	33.7	0.263617	0.089701	30.176	36.123	12.408	21.292	13.813	4.776	6.98	7.568	3.968	3.711	2.204	6.98	5.658	2.719	3.711	4.776	9.699	5.658	3.968	13.813
Ophionotus_victoriae	Ophiuridae	C5	Deep	DeepAnt	Deep	DeepAnt	Deep	rrnL	70.468	29.532	0.148515	-0.093361	38.523	31.944	12.573	16.959	14.557	4.279	5.962	10.461	3.877	3.146	1.756	5.962	5.121	2.195	3.146	4.279	11.704	5.121	3.877	14.557
Gorgonocephalus_chilensis	Gorgonocephalidae	C6	Deep	DeepAnt	Deep	DeepAnt	Deep	rrnL	75.298	24.702	0.1875	-0.012116	38.105	37.193	10.035	14.667	17.662	3.687	5.126	11.166	3.301	2.528	1.404	5.126	4.389	1.756	2.528	3.687	12.289	4.389	3.301	17.662
Astrohamma_tuberculatum	Gorgonocephalidae	C6	Shallow	DeepAnt	Shallow	DeepAnt	Antartic	rrnL	75.93	24.07	0.241983	0.009242	37.614	38.316	9.123	14.947	17.837	4.108	5.126	10.885	3.511	2.142	1.264	5.126	4.389	1.404	2.142	4.108	12.219	4.389	3.511	17.837
Astrospartus_mediterraneus	Gorgonocephalidae	C6	Shallow	Shallow	Shallow	Shallow	Shallow	rrnL	75	25	0.284553	-0.017164	38.144	36.856	8.943	16.057	17.492	3.797	5.186	11.051	3.729	2.305	1.288	5.186	4.949	1.424	2.305	3.797	11.322	4.949	3.729	17.492
Astrotoma_agassizii2	Gorgonocephalidae	C6	Deep	DeepAnt	Deep	DeepAnt	Deep	rrnL	74.784	25.216	0.242165	0.004803	37.213	37.572	9.555	15.661	17.649	3.99	5.176	10.568	3.702	2.301	1.438	5.176	4.601	1.725	2.301	3.99	11.431	4.601	3.702	17.649
Ophiosteira_antarctica	Ophiopyrgidae	C5	Shallow	DeepAnt	Shallow	DeepAnt	Antartic	rrnL	70.935	29.065	0.250633	-0.03112	36.571	34.364	10.89	18.175	14.359	4.197	6.112	10.751	3.976	2.982	1.473	6.112	5.155	2.209	2.982	4.197	12.003	5.155	3.976	14.359
Ophiosteira_sp	Ophiopyrgidae	C5	Shallow	DeepAnt	Shallow	DeepAnt	Antartic	rrnL	69.778	30.222	0.235294	-0.021231	35.63	34.148	11.556	18.667	14.122	4.077	6.004	10.675	3.929	3.484	1.705	6.004	5.263	2.298	3.484	4.077	11.564	5.263	3.929	14.122
Ophioplinthus_brevirima	Ophiopyrgidae	C5	Deep	DeepAnt	Deep	DeepAnt	Deep	rrnL	69.494	30.506	0.258537	0.006424	34.524	34.97	11.31	19.196	14.78	4.095	5.882	9.978	4.319	3.462	1.564	5.882	5.473	2.234	3.462	4.095	10.201	5.473	4.319	14.78
Ophioplinthus_gelida	Ophiopyrgidae	C5	Deep	DeepAnt	Deep	DeepAnt	Deep	rrnL	68.903	31.097	0.201856	-0.032461	35.57	33.333	12.41	18.687	13.935	4.152	6.462	9.892	4.188	3.105	1.805	6.462	5.487	2.816	3.105	4.152	10.83	5.487	4.188	13.935
Ophioplocus_japonicus	Hemieuryalidae	C3	Shallow	Shallow	Shallow	Shallow	Shallow	rrnL	65.398	34.602	0.348269	0.142241	28.048	37.35	11.276	23.326	13.999	4.901	6.417	7.405	4.337	4.443	2.116	6.417	5.43	2.539	4.443	4.901	8.886	5.43	4.337	13.999
Ophiura_albida	Ophiuridae	C5	Shallow	Shallow	Shallow	Shallow	Shallow	rrnL	73.148	26.852	0.177719	-0.074976	39.316	33.832	11.04	15.812	16.572	4.063	5.702	10.264	3.279	2.851	1.568	5.702	4.312	2.21	2.851	4.063	12.402	4.312	3.279	16.572
Ophiuroglypha_kinbergi	Ophiopyrgidae	C5	Shallow	Shallow	Shallow	Shallow	Shallow	rrnL	71.602	28.398	0.123426	-0.096903	39.27	32.332	12.446	15.951	14.961	4.188	5.691	10.952	4.331	2.613	1.575	5.691	5.261	2.147	2.613	4.188	11.238	5.261	4.331	14.961
Ophiura_lutkeni	Ophiuridae	C5	Shallow	Shallow	Shallow	Shallow	Shallow	rrnL	69.204	30.796	0.116705	-0.09165	37.773	31.431	13.601	17.195	14.739	3.984	6.206	9.661	3.738	3.279	2.186	6.206	5.254	2.891	3.279	3.984	10.86	5.254	3.738	14.739
Ophiura_sarsii	Ophiuridae	C5	Shallow	Shallow	Shallow	Shallow	Shallow	rrnL	69.04	30.96	0.109489	-0.065466	36.78	32.26	13.785	17.175	14.782	4.494	6.218	9.045	3.787	3.505	1.979	6.218	5.314	2.148	3.505	4.494	10.627	5.314	3.787	14.782
Acanthaster_brevispinus	.	.	OG	OG	OG	OG	OG	rrnS	53.548	46.452	-0.180556	-0.2249	32.796	20.753	27.419	19.032	7.75	5.92	7.212	5.92	6.028	6.566	3.445	7.212	5.382	5.382	6.566	5.92	7.535	5.382	6.028	7.75
Amphiura_sp	Amphiuridae	C1	Deep	DeepAnt	Seep	Seep	Seep	rrnS	58.843	41.157	0.27027	-0.005671	29.588	29.255	15.017	26.14	10.078	5.624	6.236	7.461	5.234	5.568	3.563	6.236	5.735	3.675	5.568	5.624	8.352	5.735	5.234	10.078
Amphiura_sp_JN-2020	Amphiuridae	C1	Deep	DeepAnt	Deep	DeepAnt	Antartic	rrnS	63.739	36.261	0.192547	-0.053004	33.559	30.18	14.64	21.622	12.345	5.073	6.032	8.343	4.566	4.622	2.931	6.032	4.284	4.171	4.622	5.073	10.71	4.284	4.566	12.345
Amphioplus_laevis	Amphiuridae	C1	Shallow	Shallow	Shallow	Shallow	Shallow	rrnS	62.626	37.374	0.237237	-0.035842	32.435	30.191	14.254	23.12	11.91	5.562	6.629	7.191	4.157	4.944	2.921	6.629	4.944	3.258	4.944	5.562	10.337	4.944	4.157	11.91
Amphipholis_squamata	Amphiuridae	C1	Shallow	Shallow	Shallow	Shallow	Shallow	rrnS	66.555	33.445	0.210702	-0.055462	35.123	31.432	13.199	20.246	12.486	5.319	6.103	9.295	3.975	3.639	3.024	6.103	4.647	3.135	3.639	5.319	12.206	4.647	3.975	12.486
Amphiura_digitula2	Amphiuridae	C1	Shallow	Shallow	Shallow	Shallow	Shallow	rrnS	64.111	35.889	0.244582	-0.081456	34.667	29.444	13.556	22.333	12.625	5.562	5.84	8.009	4.171	4.839	3.115	5.84	4.171	3.337	4.839	5.562	11.123	4.171	4.171	12.625
Amphiura_sinicola	Amphiuridae	C1	Shallow	Shallow	Shallow	Shallow	Shallow	rrnS	65.208	34.792	0.23871	-0.025818	33.446	31.762	13.244	21.549	12.697	5.281	6.517	8.09	4.213	4.101	2.584	6.517	4.27	3.708	4.101	5.281	11.461	4.27	4.213	12.697
Histampica_haimaensis	Ophiothamnidae	C2	Deep	DeepAnt	Seep	Seep	Seep	rrnS	54.955	45.045	0.21	-0.036885	28.491	26.464	17.793	27.252	7.892	5.75	6.877	6.99	5.975	5.862	3.833	6.877	5.242	5.637	5.862	5.75	8.343	5.242	5.975	7.892
Ophiopholis_aculeata	Ophiopholidae	C2	Deep	DeepAnt	Deep	DeepAnt	Deep	rrnS	60.678	39.322	0.183908	-0.01676	30.847	29.831	16.045	23.277	10.803	5.882	7.014	6.674	5.09	4.299	3.281	7.014	5.147	4.299	4.299	5.882	9.276	5.147	5.09	10.803
Ophiopholis_japonica2	Ophiopholidae	C2	Deep	DeepAnt	Deep	DeepAnt	Deep	rrnS	61.356	38.644	0.157895	0.023941	29.944	31.412	16.271	22.373	10.747	5.995	7.07	6.787	4.864	4.355	3.054	7.07	4.921	4.072	4.355	5.995	10.181	4.921	4.864	10.747
Ophiopholis_mirabilis	Ophiopholidae	C2	Shallow	Shallow	Shallow	Shallow	Shallow	rrnS	60.291	39.709	0.166197	0.005566	29.978	30.313	16.555	23.154	10.694	5.711	6.439	7.279	5.375	4.647	3.359	6.439	4.815	4.703	4.647	5.711	9.295	4.815	5.375	10.694
Ophiophthalmus_sp	Ophiacanthidae	C4	Deep	DeepAnt	Seep	Seep	Seep	rrnS	65.775	34.225	0.2443	-0.094915	36.009	29.766	12.932	21.293	11.719	5.246	5.859	10.045	4.464	4.129	2.679	5.859	4.855	2.902	4.129	5.246	11.83	4.855	4.464	11.719
Ophiacantha_linea	Ophiacanthidae	C4	Deep	DeepAnt	Deep	DeepAnt	Deep	rrnS	67.68	32.32	0.303136	-0.088186	36.824	30.856	11.261	21.059	12.57	4.397	5.581	11.274	4.171	3.777	2.593	5.581	4.735	3.269	3.777	4.397	12.401	4.735	4.171	12.57
Ophiocomina_nigra	Ophiotomidae	C4	Shallow	Shallow	Shallow	Shallow	Shallow	rrnS	61.94	38.06	0.19888	-0.025818	31.77	30.171	15.245	22.814	11.046	5.016	6.67	8.218	4.589	4.803	2.988	6.67	4.963	4.269	4.803	5.016	10.352	4.963	4.589	11.046
Ophiomastix_mixta	Ophiocomidae	C4	Shallow	Shallow	Shallow	Shallow	Shallow	rrnS	61.462	38.538	0.321839	-0.001802	30.786	30.676	13.068	25.471	11.308	5.266	7.262	6.874	4.878	4.601	2.55	7.262	5.543	3.88	4.601	5.266	8.98	5.543	4.878	11.308
Ophiarachnella_gorgonia	Ophiodermatidae	C4	Shallow	Shallow	Shallow	Shallow	Shallow	rrnS	62.636	37.364	0.376093	0.057391	29.521	33.115	11.656	25.708	11.559	5.071	6.543	8.07	4.798	4.962	2.399	6.543	5.834	2.835	4.962	5.071	9.16	5.834	4.798	11.559
Ophioplocus_incipiens	Hemieuryalidae	C3	Deep	DeepAnt	Deep	DeepAnt	Deep	rrnS	60.115	39.885	0.210375	-0.086042	32.644	27.471	15.747	24.138	10.357	5.293	7.077	7.365	4.833	4.776	3.222	7.077	5.926	3.913	4.776	5.293	8.976	5.926	4.833	10.357
Ophionotus_victoriae	Ophiuridae	C5	Deep	DeepAnt	Deep	DeepAnt	Deep	rrnS	66.667	33.333	0.208054	-0.097315	36.577	30.089	13.199	20.134	12.99	4.367	5.935	10.078	4.367	3.863	2.464	5.935	5.655	2.8	3.863	4.367	10.302	5.655	4.367	12.99
Gorgonocephalus_chilensis	Gorgonocephalidae	C6	Deep	DeepAnt	Deep	DeepAnt	Deep	rrnS	71.572	28.428	0.247059	-0.009346	36.12	35.452	10.702	17.726	15.681	3.85	5.692	10.603	3.571	2.79	2.121	5.692	4.688	2.902	2.79	3.85	11.83	4.688	3.571	15.681
Astrohamma_tuberculatum	Gorgonocephalidae	C6	Shallow	DeepAnt	Shallow	DeepAnt	Antartic	rrnS	72.166	27.834	0.298387	-0.063764	38.384	33.782	9.764	18.07	15	4.438	6.011	10.674	3.315	2.697	1.91	6.011	4.607	2.135	2.697	4.438	13.146	4.607	3.315	15
Astrospartus_mediterraneus	Gorgonocephalidae	C6	Shallow	Shallow	Shallow	Shallow	Shallow	rrnS	69.911	30.089	0.226766	-0.0624	37.136	32.774	11.633	18.456	14.782	4.311	5.879	9.966	3.863	3.08	2.24	5.879	5.151	2.464	3.08	4.311	11.198	5.151	3.863	14.782
Astrotoma_agassizii2	Gorgonocephalidae	C6	Deep	DeepAnt	Deep	DeepAnt	Deep	rrnS	70.358	29.642	0.313208	-0.046105	36.801	33.557	10.179	19.463	14.614	4.591	5.879	10.078	3.975	3.08	1.904	5.879	5.151	2.016	3.08	4.591	11.422	5.151	3.975	14.614
Ophiosteira_antarctica	Ophiopyrgidae	C5	Shallow	DeepAnt	Shallow	DeepAnt	Antartic	rrnS	64.198	35.802	0.278997	-0.034965	33.221	30.976	12.907	22.896	10.562	5.112	6.573	9.888	4.607	4.382	2.36	6.573	5.899	2.472	4.382	5.112	11.011	5.899	4.607	10.562
Ophiosteira_sp	Ophiopyrgidae	C5	Shallow	DeepAnt	Shallow	DeepAnt	Antartic	rrnS	65.878	34.122	0.247525	-0.022222	33.671	32.207	12.838	21.284	12.063	4.848	5.806	10.259	4.566	4.171	2.48	5.806	5.355	2.706	4.171	4.848	10.936	5.355	4.566	12.063
Ophioplinthus_brevirima	Ophiopyrgidae	C5	Deep	DeepAnt	Deep	DeepAnt	Deep	rrnS	65.766	34.234	0.25	-0.044521	34.347	31.419	12.838	21.396	11.218	5.299	6.37	10.034	4.961	3.664	2.142	6.37	5.806	2.368	3.664	5.299	10.823	5.806	4.961	11.218
Ophioplinthus_gelida	Ophiopyrgidae	C5	Deep	DeepAnt	Deep	DeepAnt	Deep	rrnS	65.775	34.225	0.237785	-0.074576	35.34	30.435	13.043	21.182	11.663	5.078	6.473	9.71	4.408	3.795	2.455	6.473	5.58	2.679	3.795	5.078	11.161	5.58	4.408	11.663
Ophioplocus_japonicus	Hemieuryalidae	C3	Shallow	Shallow	Shallow	Shallow	Shallow	rrnS	62.222	37.778	0.288235	0.010714	30.778	31.444	13.444	24.333	11.012	5.506	7.23	7.341	4.894	4.561	2.225	7.23	5.729	3.115	4.561	5.506	9.455	5.729	4.894	11.012
Ophiura_albida	Ophiuridae	C5	Shallow	Shallow	Shallow	Shallow	Shallow	rrnS	66.556	33.444	0.189369	-0.128548	37.556	29	13.556	19.889	13.459	4.505	5.451	9.9	4.394	4.004	2.892	5.451	5.172	3.003	4.004	4.505	10.234	5.172	4.394	13.459
Ophiuroglypha_kinbergi	Ophiopyrgidae	C5	Shallow	Shallow	Shallow	Shallow	Shallow	rrnS	65.991	34.009	0.178808	-0.088737	35.923	30.068	13.964	20.045	12.965	4.622	5.806	9.583	4.679	3.608	2.931	5.806	5.75	3.044	3.608	4.622	9.583	5.75	4.679	12.965
Ophiura_lutkeni	Ophiuridae	C5	Shallow	Shallow	Shallow	Shallow	Shallow	rrnS	65.217	34.783	0.205128	-0.090598	35.563	29.654	13.824	20.959	12.612	4.408	6.027	9.598	4.408	4.185	2.79	6.027	5.58	3.237	4.185	4.408	9.933	5.58	4.408	12.612
Ophiura_sarsii	Ophiuridae	C5	Shallow	Shallow	Shallow	Shallow	Shallow	rrnS	64.206	35.794	0.175	-0.10453	35.459	28.747	14.765	21.029	11.926	4.535	6.215	9.406	4.255	4.199	3.247	6.215	5.935	3.247	4.199	4.535	9.966	5.935	4.255	11.926
Acanthaster_brevispinus	.	.	OG	OG	OG	OG	OG	cds	55.947	44.053	-0.175588	0.062519	26.225	29.722	25.894	18.159	8.524	5.483	6.742	7.23	5.932	6.747	2.622	6.742	5.841	3.963	6.747	5.483	7.648	5.841	5.932	8.524
Amphiura_sp	Amphiuridae	C1	Deep	DeepAnt	Seep	Seep	Seep	cds	61.886	38.114	-0.090449	0.104181	27.719	34.167	20.781	17.333	11.223	4.606	6.349	8.764	5.238	5.296	2.195	6.349	5.704	3.451	5.296	4.606	8.756	5.704	5.238	11.223
Amphiura_sp_JN-2020	Amphiuridae	C1	Deep	DeepAnt	Deep	DeepAnt	Antartic	cds	60.534	39.466	-0.120628	0.081421	27.803	32.732	22.113	17.352	10.281	4.797	6.941	8.248	5.138	5.878	1.79	6.941	5.475	3.588	5.878	4.797	9.355	5.475	5.138	10.281
Amphioplus_laevis	Amphiuridae	C1	Shallow	Shallow	Shallow	Shallow	Shallow	cds	61.129	38.871	-0.060154	0.162496	25.598	35.531	20.605	18.267	11.137	4.757	7.102	7.568	4.924	5.619	1.813	7.102	5.94	3.124	5.619	4.757	8.536	5.94	4.924	11.137
Amphipholis_squamata	Amphiuridae	C1	Shallow	Shallow	Shallow	Shallow	Shallow	cds	67.132	32.868	-0.049679	0.124624	29.383	37.749	17.25	15.618	12.133	4.192	6.627	10.599	4.834	3.753	1.239	6.627	5.603	2.9	3.753	4.192	10.977	5.603	4.834	12.133
Amphiura_digitula2	Amphiuridae	C1	Shallow	Shallow	Shallow	Shallow	Shallow	cds	63.032	36.968	-0.092377	0.15376	26.67	36.362	20.191	16.776	11.9	4.838	6.332	8.437	5.014	5.216	1.942	6.332	5.427	3.015	5.216	4.838	9.149	5.427	5.014	11.9
Amphiura_sinicola	Amphiuridae	C1	Shallow	Shallow	Shallow	Shallow	Shallow	cds	65.441	34.559	-0.062755	0.139701	28.15	37.292	18.364	16.195	12.511	4.541	6.302	9.356	5	4.47	1.527	6.302	5.216	3.063	4.47	4.541	9.974	5.216	5	12.511
Histampica_haimaensis	Ophiothamnidae	C2	Deep	DeepAnt	Seep	Seep	Seep	cds	62.549	37.451	0.171589	0.25586	23.273	39.277	15.512	21.938	12.419	4.623	4.856	9.387	5.722	5.805	2.347	4.856	4.526	3.77	5.805	4.623	8.596	4.526	5.722	12.419
Ophiopholis_aculeata	Ophiopholidae	C2	Deep	DeepAnt	Deep	DeepAnt	Deep	cds	63.315	36.685	-0.048553	0.114191	28.042	35.272	19.233	17.452	11.455	4.985	6.404	8.811	5.42	4.651	1.889	6.404	5.314	3.4	4.651	4.985	9.443	5.314	5.42	11.455
Ophiopholis_japonica2	Ophiopholidae	C2	Deep	DeepAnt	Deep	DeepAnt	Deep	cds	63.339	36.661	-0.013614	0.124689	27.721	35.619	18.58	18.081	11.834	4.944	6.456	8.433	5.378	4.672	1.841	6.456	5.128	3.594	4.672	4.944	9.309	5.128	5.378	11.834
Ophiopholis_mirabilis	Ophiopholidae	C2	Shallow	Shallow	Shallow	Shallow	Shallow	cds	61.069	38.931	-0.032853	0.132693	26.483	34.586	20.105	18.826	11.397	5.201	6.494	7.437	5.644	4.933	2.412	6.494	5.21	4.131	4.933	5.201	8.262	5.21	5.644	11.397
Ophiophthalmus_sp	Ophiacanthidae	C4	Deep	DeepAnt	Seep	Seep	Seep	cds	71.078	28.922	-0.129568	0.021015	34.792	36.286	16.335	12.587	13.848	3.852	5.418	12.409	4.368	3.511	1.181	5.418	4.591	2.519	3.511	3.852	12.715	4.591	4.368	13.848
Ophiacantha_linea	Ophiacanthidae	C4	Deep	DeepAnt	Deep	DeepAnt	Deep	cds	68.266	31.734	-0.027548	0.106928	30.483	37.783	16.304	15.43	13.762	4.245	5.763	10.362	4.564	4.166	1.383	5.763	4.726	2.739	4.166	4.245	11.062	4.726	4.564	13.762
Ophiocomina_nigra	Ophiotomidae	C4	Shallow	Shallow	Shallow	Shallow	Shallow	cds	60.409	39.591	-0.050773	0.08912	27.513	32.896	20.801	18.79	10.066	5.21	6.698	8.225	5.416	5.259	2.441	6.698	5.543	3.789	5.259	5.21	9.161	5.543	5.416	10.066
Ophiomastix_mixta	Ophiocomidae	C4	Shallow	Shallow	Shallow	Shallow	Shallow	cds	61.81	38.19	-0.115702	0.119716	27.205	34.605	21.305	16.886	11.336	5.205	6.342	8.005	5.767	5.086	1.922	6.342	5.372	3.449	5.086	5.205	8.409	5.372	5.767	11.336
Ophiarachnella_gorgonia	Ophiodermatidae	C4	Shallow	Shallow	Shallow	Shallow	Shallow	cds	62.98	37.02	-0.096988	0.018121	30.919	32.06	20.306	16.715	12.168	5.304	6.13	7.875	5.59	5.084	1.723	6.13	5.471	2.663	5.084	5.304	8.244	5.471	5.59	12.168
Ophioplocus_incipiens	Hemieuryalidae	C3	Deep	DeepAnt	Deep	DeepAnt	Deep	cds	60.564	39.436	-0.108792	0.134596	26.206	34.358	21.863	17.573	11.071	4.151	7.113	7.942	4.663	5.943	2.007	7.113	5.667	3.962	5.943	4.151	8.871	5.667	4.663	11.071
Ophionotus_victoriae	Ophiuridae	C5	Deep	DeepAnt	Deep	DeepAnt	Deep	cds	65.104	34.896	-0.078039	0.111945	28.908	36.196	18.809	16.086	11.858	4.483	6.344	9.857	5.378	4.286	1.459	6.344	5.352	3.338	4.286	4.483	9.944	5.352	5.378	11.858
Gorgonocephalus_chilensis	Gorgonocephalidae	C6	Deep	DeepAnt	Deep	DeepAnt	Deep	cds	71.45	28.55	-0.036514	0.071849	33.158	38.292	14.796	13.754	15.361	4.091	5.587	10.674	4.398	3.197	1.105	5.587	5.017	1.982	3.197	4.091	10.937	5.017	4.398	15.361
Astrohamma_tuberculatum	Gorgonocephalidae	C6	Shallow	DeepAnt	Shallow	DeepAnt	Antartic	cds	73.349	26.651	0.000328	0.075146	33.919	39.43	13.321	13.33	15.557	3.769	5.571	11.771	4.145	2.829	0.796	5.571	5.077	1.662	2.829	3.769	11.876	5.077	4.145	15.557
Astrospartus_mediterraneus	Gorgonocephalidae	C6	Shallow	Shallow	Shallow	Shallow	Shallow	cds	70.564	29.436	-0.067539	0.057714	33.246	37.318	15.712	13.724	15.015	4.454	5.752	10.057	4.792	3.095	1.096	5.752	5.41	1.762	3.095	4.454	10.048	5.41	4.792	15.015
Astrotoma_agassizii2	Gorgonocephalidae	C6	Deep	DeepAnt	Deep	DeepAnt	Deep	cds	71.232	28.768	-0.035029	0.043671	34.061	37.171	14.888	13.88	14.927	4.062	5.54	11.071	4.575	3.303	0.983	5.54	5.229	1.807	3.303	4.062	10.869	5.229	4.575	14.927
Ophiosteira_antarctica	Ophiopyrgidae	C5	Shallow	DeepAnt	Shallow	DeepAnt	Antartic	cds	68.291	31.709	-0.130411	0.053556	32.317	35.974	17.922	13.787	12.576	3.466	6.271	11.828	4.409	4.018	1.174	6.271	5.566	2.809	4.018	3.466	11.576	5.566	4.409	12.576
Ophiosteira_sp	Ophiopyrgidae	C5	Shallow	DeepAnt	Shallow	DeepAnt	Antartic	cds	68.186	31.814	-0.087565	0.054303	32.242	35.944	17.3	14.514	12.703	3.79	5.967	11.628	4.621	4.297	1.04	5.967	5.263	2.562	4.297	3.79	11.488	5.263	4.621	12.703
Ophioplinthus_brevirima	Ophiopyrgidae	C5	Deep	DeepAnt	Deep	DeepAnt	Deep	cds	68.044	31.956	-0.146623	0.008124	33.746	34.298	18.321	13.635	12.575	4.045	6.25	11.147	4.989	3.913	0.843	6.25	5.499	2.53	3.913	4.045	10.936	5.499	4.989	12.575
Ophioplinthus_gelida	Ophiopyrgidae	C5	Deep	DeepAnt	Deep	DeepAnt	Deep	cds	64.384	35.616	-0.182446	0.148663	27.406	36.978	21.057	14.559	11.424	4.382	6.602	9.785	4.756	4.985	1.477	6.602	5.336	3.103	4.985	4.382	10.664	5.336	4.756	11.424
Ophioplocus_japonicus	Hemieuryalidae	C3	Shallow	Shallow	Shallow	Shallow	Shallow	cds	62.208	37.792	-0.105518	0.054285	29.415	32.792	20.89	16.902	11.558	5.045	6.596	7.897	5.22	5.53	1.572	6.596	5.539	2.795	5.53	5.045	8.762	5.539	5.22	11.558
Ophiura_albida	Ophiuridae	C5	Shallow	Shallow	Shallow	Shallow	Shallow	cds	67.576	32.424	-0.039914	0.052536	32.013	35.563	16.859	15.565	12.466	4.53	6.189	10.601	4.929	3.668	1.444	6.189	5.336	2.679	3.668	4.53	11.039	5.336	4.929	12.466
Ophiuroglypha_kinbergi	Ophiopyrgidae	C5	Shallow	Shallow	Shallow	Shallow	Shallow	cds	66.526	33.474	-0.009434	0.118407	29.325	37.202	16.895	16.579	12.563	4.43	6.481	9.783	4.826	3.873	1.572	6.481	5.651	2.793	3.873	4.43	10.205	5.651	4.826	12.563
Ophiura_lutkeni	Ophiuridae	C5	Shallow	Shallow	Shallow	Shallow	Shallow	cds	65.003	34.997	-0.095072	0.036312	31.321	33.682	19.162	15.835	11.999	4.556	6.322	9.618	5.136	4.343	1.718	6.322	5.746	2.869	4.343	4.556	9.592	5.746	5.136	11.999
Ophiura_sarsii	Ophiuridae	C5	Shallow	Shallow	Shallow	Shallow	Shallow	cds	64.632	35.368	-0.073086	0.08661	29.517	35.115	18.977	16.392	12.183	4.625	6.443	9.058	5.01	4.376	1.871	6.443	5.692	3.008	4.376	4.625	9.407	5.692	5.01	12.183
Acanthaster_brevispinus	.	.	OG	OG	OG	OG	OG	rrn	54.667	45.333	0.131907	-0.016999	27.798	26.869	19.677	25.657	8.552	5.904	6.894	5.985	5.762	6.349	3.68	6.894	5.702	4.731	6.349	5.904	7.279	5.702	5.762	8.552
Amphiura_sp	Amphiuridae	C1	Deep	DeepAnt	Seep	Seep	Seep	rrn	62.953	37.047	0.231132	-0.031228	32.46	30.494	14.242	22.805	12.09	4.875	6.821	7.652	4.591	4.635	2.492	6.821	5.531	3.498	4.635	4.875	9.27	5.531	4.591	12.09
Amphiura_sp_JN-2020	Amphiuridae	C1	Deep	DeepAnt	Deep	DeepAnt	Antartic	rrn	66.403	33.597	0.142484	-0.054233	35.002	31.401	14.405	19.192	13.275	4.967	6.593	8.352	4.374	3.714	2.11	6.593	4.462	3.648	3.714	4.967	11.121	4.462	4.374	13.275
Amphioplus_laevis	Amphiuridae	C1	Shallow	Shallow	Shallow	Shallow	Shallow	rrn	66.14	33.86	0.201038	-0.038513	34.343	31.796	13.527	20.334	13.363	5.143	6.769	7.78	3.978	3.978	2.198	6.769	4.967	2.857	3.978	5.143	10.769	4.967	3.978	13.363
Amphipholis_squamata	Amphiuridae	C1	Shallow	Shallow	Shallow	Shallow	Shallow	rrn	68.674	31.326	0.178273	-0.069886	36.736	31.937	12.871	18.455	13.821	4.76	6.528	9.214	3.843	3.166	2.14	6.528	4.825	2.926	3.166	4.76	11.834	4.825	3.843	13.821
Amphiura_digitula2	Amphiuridae	C1	Shallow	Shallow	Shallow	Shallow	Shallow	rrn	67.904	32.096	0.223404	-0.059711	35.98	31.925	12.463	19.633	14.289	4.848	6.109	8.714	3.823	3.951	2.179	6.109	4.421	2.819	3.951	4.848	11.405	4.421	3.823	14.289
Amphiura_sinicola	Amphiuridae	C1	Shallow	Shallow	Shallow	Shallow	Shallow	rrn	68.625	31.375	0.197163	-0.041505	35.737	32.888	12.595	18.781	14.232	4.9	6.303	8.864	3.964	3.385	2.049	6.303	4.365	3.029	3.385	4.9	11.759	4.365	3.964	14.232
Histampica_haimaensis	Ophiothamnidae	C2	Deep	DeepAnt	Seep	Seep	Seep	rrn	60.383	39.617	0.185602	0.015498	29.724	30.66	16.132	23.485	10.593	5.285	6.668	7.672	5.062	5.018	3.078	6.668	4.973	4.505	5.018	5.285	9.545	4.973	5.062	10.593
Ophiopholis_aculeata	Ophiopholidae	C2	Deep	DeepAnt	Deep	DeepAnt	Deep	rrn	64.974	35.026	0.172243	0.039412	31.207	33.767	14.497	20.53	12.88	5.408	6.516	7.689	4.8	3.584	2.606	6.516	4.952	3.562	3.584	5.408	9.861	4.952	4.8	12.88
Ophiopholis_japonica2	Ophiopholidae	C2	Deep	DeepAnt	Deep	DeepAnt	Deep	rrn	63.791	36.209	0.152828	0.04235	30.545	33.246	15.338	20.871	11.993	5.669	6.76	7.414	4.884	3.86	2.617	6.76	4.841	3.751	3.86	5.669	10.205	4.841	4.884	11.993
Ophiopholis_mirabilis	Ophiopholidae	C2	Shallow	Shallow	Shallow	Shallow	Shallow	rrn	64.159	35.841	0.155609	0.048518	30.523	33.636	15.132	20.709	12.484	5.539	6.491	7.529	4.933	3.938	2.553	6.491	4.738	3.721	3.938	5.539	9.952	4.738	4.933	12.484
Ophiophthalmus_sp	Ophiacanthidae	C4	Deep	DeepAnt	Seep	Seep	Seep	rrn	69.373	30.627	0.25072	-0.076336	37.335	32.039	11.474	19.153	13.472	4.638	5.83	10.733	3.931	3.445	2.12	5.83	4.726	2.518	3.445	4.638	12.544	4.726	3.931	13.472
Ophiacantha_linea	Ophiacanthidae	C4	Deep	DeepAnt	Deep	DeepAnt	Deep	rrn	70.249	29.751	0.28047	-0.053483	37.003	33.246	10.703	19.048	14.364	4.263	5.597	10.888	3.629	3.323	2.317	5.597	4.504	2.798	3.323	4.263	12.637	4.504	3.629	14.364
Ophiocomina_nigra	Ophiotomidae	C4	Shallow	Shallow	Shallow	Shallow	Shallow	rrn	64.433	35.567	0.180095	-0.035971	33.375	31.058	14.581	20.986	12.442	5.188	7.001	7.592	4.576	3.817	2.404	7.001	5.04	3.754	3.817	5.188	10.122	5.04	4.576	12.442
Ophiomastix_mixta	Ophiocomidae	C4	Shallow	Shallow	Shallow	Shallow	Shallow	rrn	65.405	34.595	0.328302	0.011311	32.332	33.072	11.619	22.977	12.848	5.357	6.882	7.622	4.726	3.746	1.96	6.882	5.248	2.962	3.746	5.357	9.843	5.248	4.726	12.848
Ophiarachnella_gorgonia	Ophiodermatidae	C4	Shallow	Shallow	Shallow	Shallow	Shallow	rrn	65.394	34.606	0.365196	0.090791	29.729	35.666	10.984	23.622	13.243	5.199	6.261	7.98	4.796	4.223	2.037	6.261	5.603	2.292	4.223	5.199	9.041	5.603	4.796	13.243
Ophioplocus_incipiens	Hemieuryalidae	C3	Deep	DeepAnt	Deep	DeepAnt	Deep	rrn	63.889	36.111	0.240695	0.025245	31.138	32.751	13.71	22.401	12.466	4.978	7.018	7.489	4.305	4.126	2.601	7.018	5.762	3.184	4.126	4.978	9.417	5.762	4.305	12.466
Ophionotus_victoriae	Ophiuridae	C5	Deep	DeepAnt	Deep	DeepAnt	Deep	rrn	68.966	31.034	0.173789	-0.094872	37.754	31.211	12.821	18.214	13.938	4.314	5.951	10.31	4.071	3.429	2.035	5.951	5.332	2.434	3.429	4.314	11.15	5.332	4.071	13.938
Gorgonocephalus_chilensis	Gorgonocephalidae	C6	Deep	DeepAnt	Deep	DeepAnt	Deep	rrn	73.859	26.141	0.212521	-0.011079	37.339	36.52	10.293	15.848	16.897	3.75	5.345	10.948	3.405	2.629	1.681	5.345	4.504	2.198	2.629	3.75	12.112	4.504	3.405	16.897
Astrohamma_tuberculatum	Gorgonocephalidae	C6	Shallow	DeepAnt	Shallow	DeepAnt	Antartic	rrn	74.482	25.518	0.265651	-0.017971	37.91	36.572	9.37	16.149	16.746	4.235	5.467	10.804	3.436	2.355	1.513	5.467	4.473	1.685	2.355	4.235	12.576	4.473	3.436	16.746
Astrospartus_mediterraneus	Gorgonocephalidae	C6	Shallow	Shallow	Shallow	Shallow	Shallow	rrn	73.08	26.92	0.260188	-0.033487	37.764	35.316	9.958	16.962	16.47	3.991	5.448	10.642	3.78	2.597	1.647	5.448	5.025	1.816	2.597	3.991	11.275	5.025	3.78	16.47
Astrotoma_agassizii2	Gorgonocephalidae	C6	Deep	DeepAnt	Deep	DeepAnt	Deep	rrn	73.053	26.947	0.272727	-0.014371	37.052	36.002	9.799	17.148	16.462	4.225	5.451	10.377	3.809	2.605	1.62	5.451	4.816	1.839	2.605	4.225	11.427	4.816	3.809	16.462
Ophiosteira_antarctica	Ophiopyrgidae	C5	Shallow	DeepAnt	Shallow	DeepAnt	Antartic	rrn	68.267	31.733	0.263305	-0.032552	35.244	33.022	11.689	20.044	12.856	4.56	6.294	10.409	4.226	3.536	1.824	6.294	5.449	2.313	3.536	4.56	11.61	5.449	4.226	12.856
Ophiosteira_sp	Ophiopyrgidae	C5	Shallow	DeepAnt	Shallow	DeepAnt	Antartic	rrn	68.231	31.769	0.240506	-0.021611	34.853	33.378	12.064	19.705	13.305	4.383	5.926	10.51	4.182	3.757	2.013	5.926	5.3	2.46	3.757	4.383	11.315	5.3	4.182	13.305
Ophioplinthus_brevirima	Ophiopyrgidae	C5	Deep	DeepAnt	Deep	DeepAnt	Deep	rrn	68.011	31.989	0.254902	-0.013175	34.453	33.557	11.918	20.072	13.363	4.574	6.076	10	4.574	3.543	1.794	6.076	5.605	2.287	3.543	4.574	10.448	5.605	4.574	13.363
Ophioplinthus_gelida	Ophiopyrgidae	C5	Deep	DeepAnt	Deep	DeepAnt	Deep	rrn	67.674	32.326	0.216802	-0.048544	35.48	32.194	12.659	19.667	13.043	4.516	6.466	9.82	4.274	3.376	2.06	6.466	5.524	2.762	3.376	4.516	10.96	5.524	4.274	13.043
Ophioplocus_japonicus	Hemieuryalidae	C3	Shallow	Shallow	Shallow	Shallow	Shallow	rrn	64.166	35.834	0.323706	0.092742	29.107	35.058	12.117	23.717	12.84	5.136	6.733	7.38	4.553	4.489	2.158	6.733	5.546	2.762	4.489	5.136	9.107	5.546	4.553	12.84
Ophiura_albida	Ophiuridae	C5	Shallow	Shallow	Shallow	Shallow	Shallow	rrn	70.573	29.427	0.182891	-0.094711	38.628	31.944	12.023	17.405	15.356	4.235	5.604	10.122	3.714	3.301	2.085	5.604	4.648	2.52	3.301	4.235	11.555	4.648	3.714	15.356
Ophiuroglypha_kinbergi	Ophiopyrgidae	C5	Shallow	Shallow	Shallow	Shallow	Shallow	rrn	69.423	30.577	0.147353	-0.093888	37.97	31.452	13.036	17.542	14.186	4.356	5.736	10.42	4.466	2.999	2.102	5.736	5.451	2.496	2.999	4.356	10.595	5.451	4.466	14.186
Ophiura_lutkeni	Ophiuridae	C5	Shallow	Shallow	Shallow	Shallow	Shallow	rrn	67.66	32.34	0.153538	-0.091257	36.917	30.743	13.687	18.653	13.915	4.149	6.137	9.637	3.997	3.63	2.42	6.137	5.38	3.025	3.63	4.149	10.501	5.38	3.997	13.915
Ophiura_sarsii	Ophiuridae	C5	Shallow	Shallow	Shallow	Shallow	Shallow	rrn	67.417	32.583	0.133641	-0.077951	36.336	31.081	14.114	18.468	13.824	4.508	6.217	9.166	3.944	3.738	2.404	6.217	5.522	2.517	3.738	4.508	10.406	5.522	3.944	13.824
Acanthaster_brevispinus	.	.	OG	OG	OG	OG	OG	trn	0	0	-1	-1	0	0	0	0	0	0	0	0	0	0	0	0	0	0	0	0	0	0	0	0
Amphiura_sp	Amphiuridae	C1	Deep	DeepAnt	Seep	Seep	Seep	trn	0	0	-1	-1	0	0	0	0	0	0	0	0	0	0	0	0	0	0	0	0	0	0	0	0
Amphiura_sp_JN-2020	Amphiuridae	C1	Deep	DeepAnt	Deep	DeepAnt	Antartic	trn	0	0	-1	-1	0	0	0	0	0	0	0	0	0	0	0	0	0	0	0	0	0	0	0	0
Amphioplus_laevis	Amphiuridae	C1	Shallow	Shallow	Shallow	Shallow	Shallow	trn	0	0	-1	-1	0	0	0	0	0	0	0	0	0	0	0	0	0	0	0	0	0	0	0	0
Amphipholis_squamata	Amphiuridae	C1	Shallow	Shallow	Shallow	Shallow	Shallow	trn	0	0	-1	-1	0	0	0	0	0	0	0	0	0	0	0	0	0	0	0	0	0	0	0	0
Amphiura_digitula2	Amphiuridae	C1	Shallow	Shallow	Shallow	Shallow	Shallow	trn	0	0	-1	-1	0	0	0	0	0	0	0	0	0	0	0	0	0	0	0	0	0	0	0	0
Amphiura_sinicola	Amphiuridae	C1	Shallow	Shallow	Shallow	Shallow	Shallow	trn	0	0	-1	-1	0	0	0	0	0	0	0	0	0	0	0	0	0	0	0	0	0	0	0	0
Histampica_haimaensis	Ophiothamnidae	C2	Deep	DeepAnt	Seep	Seep	Seep	trn	0	0	-1	-1	0	0	0	0	0	0	0	0	0	0	0	0	0	0	0	0	0	0	0	0
Ophiopholis_aculeata	Ophiopholidae	C2	Deep	DeepAnt	Deep	DeepAnt	Deep	trn	0	0	-1	-1	0	0	0	0	0	0	0	0	0	0	0	0	0	0	0	0	0	0	0	0
Ophiopholis_japonica2	Ophiopholidae	C2	Deep	DeepAnt	Deep	DeepAnt	Deep	trn	0	0	-1	-1	0	0	0	0	0	0	0	0	0	0	0	0	0	0	0	0	0	0	0	0
Ophiopholis_mirabilis	Ophiopholidae	C2	Shallow	Shallow	Shallow	Shallow	Shallow	trn	0	0	-1	-1	0	0	0	0	0	0	0	0	0	0	0	0	0	0	0	0	0	0	0	0
Ophiophthalmus_sp	Ophiacanthidae	C4	Deep	DeepAnt	Seep	Seep	Seep	trn	0	0	-1	-1	0	0	0	0	0	0	0	0	0	0	0	0	0	0	0	0	0	0	0	0
Ophiacantha_linea	Ophiacanthidae	C4	Deep	DeepAnt	Deep	DeepAnt	Deep	trn	0	0	-1	-1	0	0	0	0	0	0	0	0	0	0	0	0	0	0	0	0	0	0	0	0
Ophiocomina_nigra	Ophiotomidae	C4	Shallow	Shallow	Shallow	Shallow	Shallow	trn	0	0	-1	-1	0	0	0	0	0	0	0	0	0	0	0	0	0	0	0	0	0	0	0	0
Ophiomastix_mixta	Ophiocomidae	C4	Shallow	Shallow	Shallow	Shallow	Shallow	trn	0	0	-1	-1	0	0	0	0	0	0	0	0	0	0	0	0	0	0	0	0	0	0	0	0
Ophiarachnella_gorgonia	Ophiodermatidae	C4	Shallow	Shallow	Shallow	Shallow	Shallow	trn	0	0	-1	-1	0	0	0	0	0	0	0	0	0	0	0	0	0	0	0	0	0	0	0	0
Ophioplocus_incipiens	Hemieuryalidae	C3	Deep	DeepAnt	Deep	DeepAnt	Deep	trn	0	0	-1	-1	0	0	0	0	0	0	0	0	0	0	0	0	0	0	0	0	0	0	0	0
Ophionotus_victoriae	Ophiuridae	C5	Deep	DeepAnt	Deep	DeepAnt	Deep	trn	0	0	-1	-1	0	0	0	0	0	0	0	0	0	0	0	0	0	0	0	0	0	0	0	0
Gorgonocephalus_chilensis	Gorgonocephalidae	C6	Deep	DeepAnt	Deep	DeepAnt	Deep	trn	0	0	-1	-1	0	0	0	0	0	0	0	0	0	0	0	0	0	0	0	0	0	0	0	0
Astrohamma_tuberculatum	Gorgonocephalidae	C6	Shallow	DeepAnt	Shallow	DeepAnt	Antartic	trn	0	0	-1	-1	0	0	0	0	0	0	0	0	0	0	0	0	0	0	0	0	0	0	0	0
Astrospartus_mediterraneus	Gorgonocephalidae	C6	Shallow	Shallow	Shallow	Shallow	Shallow	trn	0	0	-1	-1	0	0	0	0	0	0	0	0	0	0	0	0	0	0	0	0	0	0	0	0
Astrotoma_agassizii2	Gorgonocephalidae	C6	Deep	DeepAnt	Deep	DeepAnt	Deep	trn	0	0	-1	-1	0	0	0	0	0	0	0	0	0	0	0	0	0	0	0	0	0	0	0	0
Ophiosteira_antarctica	Ophiopyrgidae	C5	Shallow	DeepAnt	Shallow	DeepAnt	Antartic	trn	0	0	-1	-1	0	0	0	0	0	0	0	0	0	0	0	0	0	0	0	0	0	0	0	0
Ophiosteira_sp	Ophiopyrgidae	C5	Shallow	DeepAnt	Shallow	DeepAnt	Antartic	trn	0	0	-1	-1	0	0	0	0	0	0	0	0	0	0	0	0	0	0	0	0	0	0	0	0
Ophioplinthus_brevirima	Ophiopyrgidae	C5	Deep	DeepAnt	Deep	DeepAnt	Deep	trn	0	0	-1	-1	0	0	0	0	0	0	0	0	0	0	0	0	0	0	0	0	0	0	0	0
Ophioplinthus_gelida	Ophiopyrgidae	C5	Deep	DeepAnt	Deep	DeepAnt	Deep	trn	0	0	-1	-1	0	0	0	0	0	0	0	0	0	0	0	0	0	0	0	0	0	0	0	0
Ophioplocus_japonicus	Hemieuryalidae	C3	Shallow	Shallow	Shallow	Shallow	Shallow	trn	0	0	-1	-1	0	0	0	0	0	0	0	0	0	0	0	0	0	0	0	0	0	0	0	0
Ophiura_albida	Ophiuridae	C5	Shallow	Shallow	Shallow	Shallow	Shallow	trn	0	0	-1	-1	0	0	0	0	0	0	0	0	0	0	0	0	0	0	0	0	0	0	0	0
Ophiuroglypha_kinbergi	Ophiopyrgidae	C5	Shallow	Shallow	Shallow	Shallow	Shallow	trn	0	0	-1	-1	0	0	0	0	0	0	0	0	0	0	0	0	0	0	0	0	0	0	0	0
Ophiura_lutkeni	Ophiuridae	C5	Shallow	Shallow	Shallow	Shallow	Shallow	trn	0	0	-1	-1	0	0	0	0	0	0	0	0	0	0	0	0	0	0	0	0	0	0	0	0
Ophiura_sarsii	Ophiuridae	C5	Shallow	Shallow	Shallow	Shallow	Shallow	trn	0	0	-1	-1	0	0	0	0	0	0	0	0	0	0	0	0	0	0	0	0	0	0	0	0
Acanthaster_brevispinus	.	.	OG	OG	OG	OG	OG	all	56.374	43.626	-0.29883	-0.12103	31.598	24.775	28.331	15.295	8.9	5.473	6.845	6.971	5.75	6.513	2.707	6.845	5.75	4.079	6.513	5.473	7.783	5.75	5.75	8.9
Amphiura_sp	Amphiuridae	C1	Deep	DeepAnt	Seep	Seep	Seep	all	62.036	37.964	-0.284502	-0.086553	33.703	28.333	24.382	13.581	11.365	4.679	6.599	8.374	5.001	5.178	2.205	6.599	5.769	3.357	5.178	4.679	8.881	5.769	5.001	11.365
Amphiura_sp_JN-2020	Amphiuridae	C1	Deep	DeepAnt	Deep	DeepAnt	Antartic	all	61.661	38.339	-0.183935	-0.062218	32.749	28.912	22.695	15.643	10.915	4.92	6.958	8.036	4.969	5.457	1.786	6.958	5.26	3.533	5.457	4.92	9.686	5.26	4.969	10.915
Amphioplus_laevis	Amphiuridae	C1	Shallow	Shallow	Shallow	Shallow	Shallow	all	61.763	38.237	-0.170732	-0.023555	31.609	30.154	22.382	15.854	11.413	4.893	7.082	7.492	4.707	5.419	1.909	7.082	5.736	3.072	5.419	4.893	9.028	5.736	4.707	11.413
Amphipholis_squamata	Amphiuridae	C1	Shallow	Shallow	Shallow	Shallow	Shallow	all	66.757	33.243	-0.171174	-0.024278	34.189	32.568	19.466	13.776	12.432	4.463	6.797	9.684	4.475	3.869	1.479	6.797	5.437	2.851	3.869	4.463	11.039	5.437	4.475	12.432
Amphiura_digitula2	Amphiuridae	C1	Shallow	Shallow	Shallow	Shallow	Shallow	all	63.63	36.37	-0.26346	-0.028941	32.736	30.894	22.976	13.394	12.195	4.942	6.44	8.238	4.745	5.086	1.915	6.44	5.218	2.94	5.086	4.942	9.656	5.218	4.745	12.195
Amphiura_sinicola	Amphiuridae	C1	Shallow	Shallow	Shallow	Shallow	Shallow	all	66.106	33.894	-0.209919	-0.017347	33.627	32.48	20.504	13.389	12.885	4.613	6.356	9.2	4.783	4.261	1.544	6.356	5.037	3.036	4.261	4.613	10.347	5.037	4.783	12.885
Histampica_haimaensis	Ophiothamnidae	C2	Deep	DeepAnt	Seep	Seep	Seep	all	61.501	38.499	0.18477	0.176434	25.325	36.176	15.693	22.806	11.743	4.763	5.375	8.872	5.531	5.816	2.526	5.375	4.725	3.947	5.816	4.763	8.751	4.725	5.531	11.743
Ophiopholis_aculeata	Ophiopholidae	C2	Deep	DeepAnt	Deep	DeepAnt	Deep	all	63.647	36.353	-0.172679	-0.119802	35.636	28.011	21.315	15.038	11.863	5.082	6.423	8.457	5.188	4.544	2.022	6.423	5.112	3.436	4.544	5.082	9.659	5.112	5.188	11.863
Ophiopholis_japonica2	Ophiopholidae	C2	Deep	DeepAnt	Deep	DeepAnt	Deep	all	62.798	37.202	-0.13561	-0.103123	34.637	28.161	21.124	16.079	11.808	5.052	6.6	7.938	5.135	4.734	2.134	6.6	5.11	3.707	4.734	5.052	9.344	5.11	5.135	11.808
Ophiopholis_mirabilis	Ophiopholidae	C2	Shallow	Shallow	Shallow	Shallow	Shallow	all	61.178	38.822	-0.124097	-0.07177	32.784	28.394	21.82	17.002	11.594	5.208	6.58	7.209	5.327	4.97	2.531	6.58	5.147	4.086	4.97	5.208	8.52	5.147	5.327	11.594
Ophiophthalmus_sp	Ophiacanthidae	C4	Deep	DeepAnt	Seep	Seep	Seep	all	71.417	28.583	-0.144114	0.015761	35.145	36.271	16.351	12.232	13.737	4.066	5.638	12.27	4.099	3.318	1.24	5.638	4.5	2.401	3.318	4.066	13.372	4.5	4.099	13.737
Ophiacantha_linea	Ophiacanthidae	C4	Deep	DeepAnt	Deep	DeepAnt	Deep	all	68.577	31.423	-0.202651	-0.05577	36.201	32.376	18.896	12.528	13.838	4.289	5.917	10.244	4.248	4.046	1.502	5.917	4.683	2.695	4.046	4.289	11.519	4.683	4.248	13.838
Ophiocomina_nigra	Ophiotomidae	C4	Shallow	Shallow	Shallow	Shallow	Shallow	all	60.576	39.424	-0.167372	-0.077873	32.647	27.93	23.011	16.413	10.356	5.181	6.766	7.985	5.172	5.391	2.382	6.766	5.385	3.757	5.391	5.181	9.378	5.385	5.172	10.356
Ophiomastix_mixta	Ophiocomidae	C4	Shallow	Shallow	Shallow	Shallow	Shallow	all	62.176	37.824	-0.298926	-0.111739	34.562	27.614	24.565	13.259	11.756	5.25	6.508	7.572	5.405	4.908	2.092	6.508	5.299	3.456	4.908	5.25	8.627	5.299	5.405	11.756
Ophiarachnella_gorgonia	Ophiodermatidae	C4	Shallow	Shallow	Shallow	Shallow	Shallow	all	63.274	36.726	-0.319447	-0.242493	39.309	23.965	24.229	12.497	12.385	5.311	6.283	7.657	5.314	4.96	1.806	6.283	5.515	2.577	4.96	5.311	8.422	5.515	5.314	12.385
Ophioplocus_incipiens	Hemieuryalidae	C3	Deep	DeepAnt	Deep	DeepAnt	Deep	all	60.513	39.487	-0.233566	-0.103404	33.385	27.128	24.355	15.132	10.922	4.446	7.13	7.754	4.686	5.691	2.237	7.13	5.642	3.966	5.691	4.446	9.008	5.642	4.686	10.922
Ophionotus_victoriae	Ophiuridae	C5	Deep	DeepAnt	Deep	DeepAnt	Deep	all	66.301	33.699	-0.107841	0.077913	30.567	35.733	18.667	15.033	12.444	4.413	6.286	10.006	4.965	4.074	1.525	6.286	5.276	3.088	4.074	4.413	10.464	5.276	4.965	12.444
Gorgonocephalus_chilensis	Gorgonocephalidae	C6	Deep	DeepAnt	Deep	DeepAnt	Deep	all	72.068	27.932	-0.198687	-0.084217	39.069	32.999	16.741	11.191	15.844	4.056	5.672	10.458	4.059	3.038	1.198	5.672	4.93	1.944	3.038	4.056	11.204	4.93	4.059	15.844
Astrohamma_tuberculatum	Gorgonocephalidae	C6	Shallow	DeepAnt	Shallow	DeepAnt	Antartic	all	73.659	26.341	-0.201848	-0.097456	40.419	33.24	15.829	10.512	15.9	3.897	5.667	11.365	3.854	2.677	0.973	5.667	4.992	1.606	2.677	3.897	12.082	4.992	3.854	15.9
Astrospartus_mediterraneus	Gorgonocephalidae	C6	Shallow	Shallow	Shallow	Shallow	Shallow	all	71.24	28.76	-0.270664	-0.111169	39.58	31.66	18.272	10.488	15.459	4.333	5.82	10.008	4.36	2.972	1.226	5.82	5.346	1.731	2.972	4.333	10.458	5.346	4.36	15.459
Astrotoma_agassizii2	Gorgonocephalidae	C6	Deep	DeepAnt	Deep	DeepAnt	Deep	all	71.902	28.098	-0.228707	-0.114884	40.081	31.821	17.262	10.836	15.438	4.097	5.597	10.818	4.249	3.128	1.075	5.597	5.069	1.755	3.128	4.097	11.195	5.069	4.249	15.438
Ophiosteira_antarctica	Ophiopyrgidae	C5	Shallow	DeepAnt	Shallow	DeepAnt	Antartic	all	69.368	30.632	-0.170929	0.030056	33.642	35.726	17.934	12.698	13.055	3.702	6.146	11.78	4.261	3.731	1.178	6.146	5.404	2.48	3.731	3.702	11.963	5.404	4.261	13.055
Ophiosteira_sp	Ophiopyrgidae	C5	Shallow	DeepAnt	Shallow	DeepAnt	Antartic	all	68.885	31.115	-0.140212	0.028138	33.473	35.412	17.739	13.376	13.086	3.91	5.968	11.481	4.375	4.135	1.08	5.968	5.17	2.341	4.135	3.91	11.811	5.17	4.375	13.086
Ophioplinthus_brevirima	Ophiopyrgidae	C5	Deep	DeepAnt	Deep	DeepAnt	Deep	all	68.429	31.571	-0.185082	-0.019403	34.878	33.55	18.707	12.864	12.868	4.159	6.257	10.929	4.726	3.843	0.958	6.257	5.437	2.349	3.843	4.159	11.186	5.437	4.726	12.868
Ophioplinthus_gelida	Ophiopyrgidae	C5	Deep	DeepAnt	Deep	DeepAnt	Deep	all	65.987	34.013	-0.165654	0.063381	30.902	35.085	19.824	14.189	12.023	4.479	6.5	9.991	4.62	4.441	1.447	6.5	5.281	2.806	4.441	4.479	11.068	5.281	4.62	12.023
Ophioplocus_japonicus	Hemieuryalidae	C3	Shallow	Shallow	Shallow	Shallow	Shallow	all	62.401	37.599	-0.334761	-0.216796	37.965	24.436	25.093	12.506	11.776	5.052	6.734	7.638	4.977	5.337	1.753	6.734	5.581	2.831	5.337	5.052	8.865	5.581	4.977	11.776
Ophiura_albida	Ophiuridae	C5	Shallow	Shallow	Shallow	Shallow	Shallow	all	68.486	31.514	-0.080191	0.04236	32.793	35.694	17.021	14.493	13.249	4.503	6.146	10.344	4.515	3.559	1.538	6.146	5.175	2.521	3.559	4.503	11.303	5.175	4.515	13.249
Ophiuroglypha_kinbergi	Ophiopyrgidae	C5	Shallow	Shallow	Shallow	Shallow	Shallow	all	66.745	33.255	-0.052785	0.085336	30.525	36.221	17.505	15.75	12.666	4.519	6.432	9.758	4.655	3.798	1.743	6.432	5.584	2.724	3.798	4.519	10.466	5.584	4.655	12.666
Ophiura_lutkeni	Ophiuridae	C5	Shallow	Shallow	Shallow	Shallow	Shallow	all	65.872	34.128	-0.126818	0.005169	32.766	33.106	19.228	14.9	12.791	4.501	6.38	9.262	4.623	4.314	1.749	6.38	5.491	2.759	4.314	4.501	10.03	5.491	4.623	12.791
Ophiura_sarsii	Ophiuridae	C5	Shallow	Shallow	Shallow	Shallow	Shallow	all	65.253	34.747	-0.109031	0.049289	31.018	34.235	19.268	15.479	12.432	4.671	6.526	8.999	4.692	4.174	1.982	6.526	5.647	2.879	4.174	4.671	9.854	5.647	4.692	12.432
