# Supplementary material for: Strategy of micro-environmental adaptation to cold seep among different brittle stars’ colonization
Source: Frontiers journal article supplement (doi:10.3389/fevo.2022.1027139), 2022-11-23
Supplement: Table_2.XLSX [file Table_2.XLSX]

## Sheet: Amphiura
ID	A. laevis	A. squamata	A. digitula	A. sinicola	Amphiura sp. JN-2020	Amphiura sp.
Ophiopholis_japonica2	0.362861	0.351066	0.359264	0.363614	0.371727	0.364534
Ophiopholis_aculeata	0.365788	0.356587	0.365872	0.37524	0.37248	0.365286
Ophiopholis_mirabilis	0.361188	0.361439	0.364032	0.373484	0.374822	0.369302
Histampica_haimaensis	0.388624	0.379005	0.387788	0.391552	0.399833	0.396989

## Sheet: Ophiophthalmus
ID	O. nigra	O. linea	Ophiophthalmus sp.
Ophiarachnella_gorgonia	0.324049	0.328064	0.368381
Ophiomastix_mixta	0.356169	0.358427	0.387871

## Sheet: Histampica
ID	O. mirabilis	O. japonica	O. aculeata	H. haimaensis
Amphioplus_laevis	0.361188	0.362861	0.365788	0.388624
Amphipholis_squamata	0.361439	0.351066	0.356587	0.379005
Amphiura_digitula2	0.364032	0.359264	0.365872	0.387788
Amphiura_sinicola	0.373484	0.363614	0.37524	0.391552
Amphiura_sp_JN-2020	0.374822	0.371727	0.37248	0.399833
Amphiura_sp	0.369302	0.364534	0.365286	0.396989
